# Supplementary material for: Molecular insights into the effect of small molecule impurities in the ring-opening polymerization of [PCl2N]3 using quantum mechanical analysis
Source: Royal Society of Chemistry journal article supplement (doi:10.1039/d5cp05068e), 2026-06-04
Supplement: d5cp05068e1.pdf [file d5cp05068e1.pdf]

# Molecular Insights into the Effect of Small Molecule Impurities in the Ring-Opening Polymerization of $[\text{PCl}_2\text{N}]_3$ using Quantum Mechanical Analysis

## Supplemental Information

Yuan Xue,<sup>1,2\*</sup> Carrie R. Salmon,<sup>3</sup> Valentin Gogonea,<sup>4,5,6</sup>

<sup>1</sup>Department of Chemistry and Biochemistry, The University of Mississippi, University, MS, 38677, United States.

<sup>2</sup>Department of Chemistry and Biochemistry, Oberlin College, Oberlin, OH, 44074, United States.

<sup>3</sup>Department of Natural & Social Sciences, State College of Florida, Manatee-Sarasota Venice Campus, Venice, FL, 34293, United States.

<sup>4</sup>Department of Chemistry, Cleveland State University, Cleveland, OH, 44115, United States.

<sup>5</sup>Department of Blood, Lung, and Kidney Research, Cleveland Clinic, Cleveland, OH, 44195, United States.

<sup>6</sup>Center for Microbiome & Human Health, Cleveland Clinic, Cleveland, OH, 44195, United States.

**\* Correspondence:**

Yuan Xue

yxue@olemiss.edu

**A friendly reminder:**

**Please check how long this document is before printing.**

# Table of Contents

|                                                                                                                                                                                                                                                                                                                      |    |
|----------------------------------------------------------------------------------------------------------------------------------------------------------------------------------------------------------------------------------------------------------------------------------------------------------------------|----|
| <b>Section 1. Selected paths and activation energies for critical steps in the reaction of chlorophosphazene with H<sub>2</sub>O and HCl determined at different levels of QM theories and their accuracy when compared to the results at the CCSD(T)/aTZ  MP2/aTZ level of theory</b> .....                         | 15 |
| <b>Table S1.</b> The activation energy ( $E_a$ , in kJ/mol) for the hydrolysis and tautomerization catalyzed by HCl, determined at different DFT levels of theory, the MP2/aXZ levels of theory where X = D, T and Q and the CCSD(T)/aTZ level of theory. ....                                                       | 15 |
| <b>Table S2.</b> The activation energy ( $E_a$ , in kJ/mol) for the tautomerization reaction without interference, determined at different DFT levels of theory, the MP2/aXZ levels of theory where X = D, T and Q and the CCSD(T)/aTZ level of theory. ....                                                         | 15 |
| <b>Table S3.</b> The activation energy ( $E_a$ , in kJ/mol) for the ring-opening reaction initiated by HCl, determined at different DFT levels of theory, the MP2/aXZ levels of theory where X = D, T and Q and the CCSD(T)/aTZ level of theory. ....                                                                | 15 |
| <b>Table S4.</b> The percent of energy deviation (%) of hydrolysis and tautomerization catalyzed by HCl, determined at different DFT levels of theory, the MP2/aXZ levels of theory where X = D, T and Q compared with the results obtained at the CCSD(T)/aTZ  MP2/aTZ level of theory..                            | 16 |
| <b>Table S5.</b> The percent of energy deviation (%) of the tautomerization reaction without interference, determined at different DFT levels of theory, the MP2/aXZ levels of theory where X = D, T and Q compared with the results obtained at the CCSD(T)/aTZ  MP2/aTZ level of theory. ....                      | 16 |
| <b>Table S6.</b> The percent of energy deviation (%) of the ring-opening reaction initiated by HCl, determined at different DFT levels of theory, the MP2/aXZ levels of theory where X = D, T and Q compared with the results obtained at the CCSD(T)/aTZ  MP2/aTZ level of theory. ....                             | 16 |
| <b>Scheme S1.</b> The stationary point for the hydrolysis reaction characterized at (a). the B3LYP/6-311+G(d,p) level of theory* and the (b). M06-2X/6-311+G(d,p) level of theory. ....                                                                                                                              | 17 |
| <b>Section 2. Harmonic vibrational frequencies (<math>\omega</math> in cm<sup>-1</sup>) and infrared intensities (IR in km mol<sup>-1</sup>) for the pivotal energy minima in the reaction mechanisms</b> .....                                                                                                      | 18 |
| <b>Table S7.</b> Harmonic vibrational frequencies ( $\omega$ in cm <sup>-1</sup> ) and infrared intensities (IR intensity in km mol <sup>-1</sup> ) for the reactants ( <b>R</b> ) for the hydrolysis reaction fully optimized at the MP2/aTZ and the B3LYP/6-311+G(d,p) level of theory. ....                       | 18 |
| <b>Table S8.</b> Harmonic vibrational frequencies ( $\omega$ in cm <sup>-1</sup> ) and infrared intensities (IR intensity in km mol <sup>-1</sup> ) for the product with 1 hydrogen bond ( <b>P_1HB</b> ) for the hydrolysis reaction fully optimized at the MP2/aTZ and the B3LYP/6-311+G(d,p) level of theory..... | 19 |

|                                                                                                                                                                                                                                                                                                                                          |    |
|------------------------------------------------------------------------------------------------------------------------------------------------------------------------------------------------------------------------------------------------------------------------------------------------------------------------------------------|----|
| <b>Table S9.</b> Harmonic vibrational frequencies ( $\omega$ in $\text{cm}^{-1}$ ) and infrared intensities (IR intensity in $\text{km mol}^{-1}$ ) for the product with 2 hydrogen bonds ( <b>P_2HB</b> ) for the hydrolysis reaction fully optimized at the MP2/aTZ and the B3LYP/6-311+G(d,p) level of theory.....                    | 20 |
| <b>Table S10.</b> Harmonic vibrational frequencies ( $\omega$ in $\text{cm}^{-1}$ ) and infrared intensities (IR intensity in $\text{km mol}^{-1}$ ) for the products ( <b>P</b> ) for the hydrolysis reaction fully optimized at the MP2/aTZ and the B3LYP/6-311+G(d,p) level of theory. ....                                           | 21 |
| <b>Table S11.</b> Harmonic vibrational frequencies ( $\omega$ in $\text{cm}^{-1}$ ) and infrared intensities (IR intensity in $\text{km mol}^{-1}$ ) for the reactants ( <b>R'</b> ) for the HCl-initiated ring-opening reaction fully optimized at the MP2/aTZ and the B3LYP/6-311+G(d,p) level of theory.....                          | 22 |
| <b>Table S12.</b> Harmonic vibrational frequencies ( $\omega$ in $\text{cm}^{-1}$ ) and infrared intensities (IR intensity in $\text{km mol}^{-1}$ ) for the intermediate ( <b>Int'</b> ) for the HCl-initiated ring-opening reaction fully optimized at the MP2/aTZ and the B3LYP/6-311+G(d,p) level of theory. ....                    | 23 |
| <b>Table S13.</b> Harmonic vibrational frequencies ( $\omega$ in $\text{cm}^{-1}$ ) and infrared intensities (IR intensity in $\text{km mol}^{-1}$ ) for the product ( <b>P'</b> ) for the HCl-initiated ring-opening reaction fully optimized at the MP2/aTZ and the B3LYP/6-311+G(d,p) level of theory.....                            | 24 |
| <b>Table S14.</b> Harmonic vibrational frequencies ( $\omega$ in $\text{cm}^{-1}$ ) and infrared intensities (IR intensity in $\text{km mol}^{-1}$ ) for the reactant of the tautomerization reaction without the interferences of HCl ( <b>Tauto_R</b> ) fully optimized at the MP2/aTZ and the B3LYP/6-311+G(d,p) level of theory. ... | 25 |
| <b>Table S15.</b> Harmonic vibrational frequencies ( $\omega$ in $\text{cm}^{-1}$ ) and infrared intensities (IR intensity in $\text{km mol}^{-1}$ ) for the product of the tautomerization reaction without the interferences of HCl ( <b>Tauto_P</b> ) fully optimized at the MP2/aTZ and the B3LYP/6-311+G(d,p) level of theory.....  | 26 |
| <b>Section 3. Bond lengths for chemical species appearing in the ring-opening reaction at the MP2/aTZ level of theory</b> .....                                                                                                                                                                                                          | 27 |
| <b>Table S16.</b> Bond lengths (in Angstrom, $\text{\AA}$ ) of the reactants ( <b>R'</b> ) for the HCl-initiated ring-opening reaction fully optimized at the MP2/aTZ level of theory. ....                                                                                                                                              | 27 |
| <b>Table S17.</b> Bond lengths (in Angstrom, $\text{\AA}$ ) of the first transition state ( <b>TS1</b> ) for the HCl-initiated ring-opening reaction fully optimized at the MP2/aTZ level of theory. ....                                                                                                                                | 27 |
| <b>Table S18.</b> Bond lengths (in Angstrom, $\text{\AA}$ ) of the intermediate ( <b>Int'</b> ) for the HCl-initiated ring-opening reaction fully optimized at the MP2/aTZ level of theory.....                                                                                                                                          | 28 |
| <b>Table S19.</b> Bond lengths (in Angstrom, $\text{\AA}$ ) of the second transition state ( <b>TS2</b> ) for the HCl-initiated ring-opening reaction fully optimized at the MP2/aTZ level of theory. ....                                                                                                                               | 28 |
| <b>Table S20.</b> Bond lengths (in Angstrom, $\text{\AA}$ ) of the products ( <b>P'</b> ) for the HCl-initiated ring-opening reaction fully optimized at the MP2/aTZ level of theory. ....                                                                                                                                               | 29 |
| <b>Section 4. The energies and shapes of the frontier molecular orbitals of selected structures</b> .....                                                                                                                                                                                                                                | 29 |

|                                                                                                                                                                                                                                 |    |
|---------------------------------------------------------------------------------------------------------------------------------------------------------------------------------------------------------------------------------|----|
| <b>Table S21.</b> The energy (in Hartree) of selected frontier molecular orbitals of the reactant ( <b>R</b> ) and transition state ( <b>TS1'</b> ) in the ring-opening reaction at the MP2/aTZ level of theory .....           | 29 |
| <b>Figure S1.</b> The shape of the selected frontier molecular orbitals of the reactant ( <b>R</b> ) and transition state ( <b>TS1'</b> ) in the ring-opening reaction at the MP2/aTZ level of theory .....                     | 30 |
| <b>Section 5. Cartesian Coordinates</b> .....                                                                                                                                                                                   | 31 |
| Section 5.1 Electronic structures fully optimized at the MP2/aTZ level of theory .....                                                                                                                                          | 31 |
| Section 5.1.1. Cartesian Coordinates for the pivotal structure of the hydrolysis reaction followed by HCl-catalyzed tautomerization calculated at the MP2/aTZ level of theory .....                                             | 31 |
| <b>Table S22.</b> Cartesian coordinates (in Angstrom, Å) of the reactants ( <b>R</b> ) for the hydrolysis reaction fully optimized at the MP2/aTZ level of theory. ....                                                         | 31 |
| <b>Table S23.</b> Cartesian coordinates (in Angstrom, Å) of the transition state ( <b>TS</b> ) for the hydrolysis reaction fully optimized at the MP2/aTZ level of theory.....                                                  | 31 |
| <b>Table S24.</b> Cartesian coordinates (in Angstrom, Å) of the products ( <b>P_1HB</b> ) for the hydrolysis reaction fully optimized at the MP2/aTZ level of theory.....                                                       | 32 |
| <b>Table S25.</b> Cartesian coordinates (in Angstrom, Å) of the product with two hydrogen bonds ( <b>P_2HB</b> ) for the hydrolysis reaction fully optimized at the MP2/aTZ level of theory. ....                               | 32 |
| <b>Table S26.</b> Cartesian coordinates (in Angstrom, Å) of the synchronous proton transfer transition state ( <b>SPT_TS</b> ) after the hydrolysis reaction fully optimized at the MP2/aTZ level of theory.....                | 33 |
| <b>Table S27.</b> Cartesian coordinates (in Angstrom, Å) of the final product ( <b>P</b> fully optimized at the MP2/aTZ level of theory) after the HCl-catalyzed tautomerization.....                                           | 33 |
| Section 5.1.2. Cartesian coordinates for chemical species appearing in tautomerization reaction in the absence of HCl interference calculated at the MP2/aTZ level of theory .....                                              | 34 |
| <b>Table S28.</b> Cartesian coordinates (in Angstrom, Å) of the reactants in the tautomerization reaction occurring in the absence of HCl interferences ( <b>Tauto_R</b> ) fully optimized at the MP2/aTZ level of theory. .... | 34 |
| <b>Table S29.</b> Cartesian coordinates (in Angstrom, Å) of the tautomerization transition state without HCl interferences ( <b>Tauto_TS</b> ) fully optimized at the MP2/aTZ level of theory.....                              | 34 |
| <b>Table S30.</b> Cartesian coordinates (in Angstrom, Å) of the product of the tautomerization reaction without HCl interferences ( <b>Tauto_P</b> ) fully optimized at the MP2/aTZ level of theory. ....                       | 35 |
| Section 5.1.3. Cartesian Coordinates for chemical species appearing in the ring-opening reaction at the MP2/aTZ level of theory.....                                                                                            | 35 |
| <b>Table S31.</b> Cartesian coordinates (in Angstrom, Å) of the reactants ( <b>R'</b> ) for the HCl-initiated ring-opening reaction fully optimized at the MP2/aTZ level of theory.....                                         | 35 |

|                                                                                                                                                                                                                                  |    |
|----------------------------------------------------------------------------------------------------------------------------------------------------------------------------------------------------------------------------------|----|
| <b>Table S32.</b> Cartesian coordinates (in Angstrom, Å) of the transition state ( <b>TS1'</b> ) for the HCl-initiated ring-opening reaction fully optimized at the MP2/aTZ level of theory. ....                                | 36 |
| <b>Table S33.</b> Cartesian coordinates (in Angstrom, Å) of the intermediate ( <b>Int'</b> ) for the HCl-initiated ring-opening reaction fully optimized at the MP2/aTZ level of theory. ....                                    | 36 |
| <b>Table S34.</b> Cartesian coordinates (in Angstrom, Å) of the transition state ( <b>TS2'</b> ) for the HCl-initiated ring-opening reaction fully optimized at the MP2/aTZ level of theory. ....                                | 37 |
| <b>Table S35.</b> Cartesian coordinates (in Angstrom, Å) of the products ( <b>P'</b> ) for the HCl-initiated ring-opening reaction fully optimized at the MP2/aTZ level of theory. ....                                          | 37 |
| Section 5.2 Coordinates for the electronic structures fully optimized at the B3LYP/6-311+G(d,p) level of theory .....                                                                                                            | 38 |
| Section 5.2.1. Cartesian Coordinates for the pivotal structure in the hydrolysis reaction followed by HCl-catalyzed tautomerization at the B3LYP/6-311+G(d,p) level of theory.....                                               | 38 |
| <b>Table S36.</b> Cartesian coordinates (in Angstrom, Å) of the reactants ( <b>R</b> ) for the hydrolysis reaction fully optimized at the B3LYP/6-311+G(d,p) level of theory. ....                                               | 38 |
| <b>Table S37.</b> Cartesian coordinates (in Angstrom, Å) of the transition state ( <b>TS</b> ) for the hydrolysis reaction fully optimized at the B3LYP/6-311+G(d,p) level of theory.....                                        | 38 |
| <b>Table S38.</b> Cartesian coordinates (in Angstrom, Å) of the products with one hydrogen bond ( <b>P_1HB</b> ) for the hydrolysis reaction fully optimized at the B3LYP/6-311+G(d,p) level of theory. ....                     | 39 |
| <b>Table S39.</b> Cartesian coordinates (in Angstrom, Å) of the hydrogen bond configuration change transition state ( <b>TS_HB</b> ) for the hydrolysis reaction fully optimized at the B3LYP/6-311+G(d,p) level of theory. .... | 39 |
| <b>Table S40.</b> Cartesian coordinates (in Angstrom, Å) of the products with two hydrogen bonds ( <b>P_2HB</b> ) for the hydrolysis reaction fully optimized at the B3LYP/6-311+G(d,p) level of theory. ....                    | 40 |
| <b>Table S41.</b> Cartesian coordinates (in Angstrom, Å) of the synchronous proton transfer transition state ( <b>SPT_TS</b> ) after the hydrolysis reaction fully optimized at the B3LYP/6-311+G(d,p) level of theory. ....     | 40 |
| <b>Table S42.</b> Cartesian coordinates (in Angstrom, Å) of the final product ( <b>P</b> ) after the HCl-catalyzed tautomerization fully optimized at the B3LYP/6-311+G(d,p) level of theory. ....                               | 41 |
| Section 5.2.2. Cartesian Coordinates for chemical species appearing in the tautomerization reaction without the interference from HCl at the B3LYP/6-311+G(d,p) level of theory .....                                            | 41 |
| <b>Table S43.</b> Cartesian coordinates (in Angstrom, Å) of the reactants of the tautomerization reaction without the interferences of HCl ( <b>Tauto_R</b> ) fully optimized at the B3LYP/6-311+G(d,p) level of theory. ....    | 41 |

|                                                                                                                                                                                                                                     |    |
|-------------------------------------------------------------------------------------------------------------------------------------------------------------------------------------------------------------------------------------|----|
| <b>Table S44.</b> Cartesian coordinates (in Angstrom, Å) of the tautomerization transition state without the interferences ( <b>Tauto_TS</b> ) fully optimized at the B3LYP/6-311+G(d,p) of theory.<br>.....                        | 42 |
| <b>Table S45.</b> Cartesian coordinates (in Angstrom, Å) of the product of the tautomerization reaction without the interferences ( <b>Tauto_P</b> ) fully optimized at the B3LYP/6-311+G(d,p) level of theory. ....                | 42 |
| Section 5.2.3. Cartesian Coordinates for chemical species appearing in the ring-opening reaction at B3LYP/6-311+G(d,p) level of theory.....                                                                                         | 43 |
| <b>Table S46.</b> Cartesian coordinates (in Angstrom, Å) of the reactants ( <b>R'</b> ) for the HCl-initiated ring-opening reaction fully optimized at the B3LYP/6-311+G(d,p) level of theory.....                                  | 43 |
| <b>Table S47.</b> Cartesian coordinates (in Angstrom, Å) of the transition state ( <b>TS1</b> ) for the HCl-initiated ring-opening reaction fully optimized at the B3LYP/6-311+G(d,p) level of theory...                            | 43 |
| <b>Table S48.</b> Cartesian coordinates (in Angstrom, Å) of the intermediate ( <b>Int</b> ) for the HCl-initiated ring-opening reaction fully optimized at the B3LYP/6-311+G(d,p) level of theory...                                | 44 |
| <b>Table S49.</b> Cartesian coordinates (in Angstrom, Å) of the transition state ( <b>TS2</b> ) for the HCl-initiated ring-opening reaction fully optimized at the B3LYP/6-311+G(d,p) level of theory...                            | 44 |
| <b>Table S50.</b> Cartesian coordinates (in Angstrom, Å) of the products ( <b>P'</b> ) for the HCl-initiated ring-opening reaction fully optimized at the B3LYP/6-311+G(d,p) level of theory.....                                   | 45 |
| Section 5.3 Electronic structures fully optimized at the B3LYP-D3/6-311+G(d,p) level of theory<br>.....                                                                                                                             | 45 |
| Section 5.3.1. Cartesian Coordinates for the pivotal structure in the hydrolysis reaction followed by HCl-catalyzed tautomerization at the B3LYP-D3/6-311+G(d,p) level of theory .....                                              | 45 |
| <b>Table S51.</b> Cartesian coordinates (in Angstrom, Å) of the reactants ( <b>R</b> ) for the hydrolysis reaction fully optimized at the B3LYP-D3/6-311+G(d,p) level of theory. ....                                               | 45 |
| <b>Table S52.</b> Cartesian coordinates (in Angstrom, Å) of the transition state ( <b>TS</b> ) for the hydrolysis reaction fully optimized at the B3LYP-D3/6-311+G(d,p) level of theory. ....                                       | 46 |
| <b>Table S53.</b> Cartesian coordinates (in Angstrom, Å) of the products with one hydrogen bond ( <b>P_1HB</b> ) for the hydrolysis reaction fully optimized at the B3LYP-D3/6-311+G(d,p) level of theory. ....                     | 46 |
| <b>Table S54.</b> Cartesian coordinates (in Angstrom, Å) of the hydrogen bond configuration change transition state ( <b>TS_HB</b> ) for the hydrolysis reaction fully optimized at the B3LYP-D3/6-311+G(d,p) level of theory. .... | 47 |
| <b>Table S55.</b> Cartesian coordinates (in Angstrom, Å) of the products with two hydrogen bonds ( <b>P_2HB</b> ) for the hydrolysis reaction fully optimized at the B3LYP-D3/6-311+G(d,p) level of theory. ....                    | 47 |

|                                                                                                                                                                                                                                  |    |
|----------------------------------------------------------------------------------------------------------------------------------------------------------------------------------------------------------------------------------|----|
| <b>Table S56.</b> Cartesian coordinates (in Angstrom, Å) of the synchronous proton transfer transition state ( <b>SPT_TS</b> ) after the hydrolysis reaction fully optimized at the B3LYP-D3/6-311+G(d,p) level of theory. ....  | 48 |
| <b>Table S57.</b> Cartesian coordinates (in Angstrom, Å) of the final product ( <b>P</b> ) after the HCl-catalyzed tautomerization fully optimized at the B3LYP-D3/6-311+G(d,p) level of theory. ....                            | 48 |
| Section 5.3.2. Cartesian Coordinates for chemical species appearing in the tautomerization reaction without the interference from HCl at the B3LYP-D3/6-311+G(d,p) level of theory .....                                         | 49 |
| <b>Table S58.</b> Cartesian coordinates (in Angstrom, Å) of the reactants of the tautomerization reaction without the interferences of HCl ( <b>Tauto_R</b> ) fully optimized at the B3LYP-D3/6-311+G(d,p) level of theory. .... | 49 |
| <b>Table S59.</b> Cartesian coordinates (in Angstrom, Å) of the tautomerization transition state without the interferences ( <b>Tauto_TS</b> ) fully optimized at the B3LYP-D3/6-311+G(d,p) of theory. ....                      | 49 |
| <b>Table S60.</b> Cartesian coordinates (in Angstrom, Å) of the product of the tautomerization reaction without the interferences ( <b>Tauto_P</b> ) fully optimized at the B3LYP-D3/6-311+G(d,p) level of theory. ....          | 50 |
| Section 5.3.3. Cartesian Coordinates for chemical species appearing in the ring-opening reaction at the B3LYP-D3/6-311+G(d,p) level of theory.....                                                                               | 50 |
| <b>Table S61.</b> Cartesian coordinates (in Angstrom, Å) of the reactants ( <b>R'</b> ) for the HCl-initiated ring-opening reaction fully optimized at the B3LYP-D3/6-311+G(d,p) level of theory. ....                           | 50 |
| <b>Table S62.</b> Cartesian coordinates (in Angstrom, Å) of the transition state ( <b>TS1</b> ) for the HCl-initiated ring-opening reaction fully optimized at the B3LYP-D3/6-311+G(d,p) level of theory. ....                   | 51 |
| <b>Table S63.</b> Cartesian coordinates (in Angstrom, Å) of the intermediate ( <b>Int</b> ) for the HCl-initiated ring-opening reaction fully optimized at the B3LYP-D3/6-311+G(d,p) level of theory. ....                       | 51 |
| <b>Table S64.</b> Cartesian coordinates (in Angstrom, Å) of the transition state ( <b>TS2</b> ) for the HCl-initiated ring-opening reaction fully optimized at the B3LYP-D3/6-311+G(d,p) level of theory. ....                   | 52 |
| <b>Table S65.</b> Cartesian coordinates (in Angstrom, Å) of the products ( <b>P'</b> ) for the HCl-initiated ring-opening reaction fully optimized at the B3LYP-D3/6-311+G(d,p) level of theory. ....                            | 52 |
| Section 5.4 Electronic structures fully optimized at the B3LYP/aTZ level of theory .....                                                                                                                                         | 53 |
| Section 5.4.1. Cartesian Coordinates for the pivotal structure in the hydrolysis reaction followed by HCl-catalyzed tautomerization at the B3LYP/aTZ level of theory .....                                                       | 53 |
| <b>Table S66.</b> Cartesian coordinates (in Angstrom, Å) of the reactants ( <b>R</b> ) for the hydrolysis reaction fully optimized at the B3LYP/aTZ level of theory.....                                                         | 53 |

|                                                                                                                                                                                                                         |    |
|-------------------------------------------------------------------------------------------------------------------------------------------------------------------------------------------------------------------------|----|
| <b>Table S67.</b> Cartesian coordinates (in Angstrom, Å) of the transition state ( <b>TS</b> ) for the hydrolysis reaction fully optimized at the B3LYP/aTZ level of theory. ....                                       | 53 |
| <b>Table S68.</b> Cartesian coordinates (in Angstrom, Å) of the products with one hydrogen bond ( <b>P_1HB</b> ) for the hydrolysis reaction fully optimized at the B3LYP/aTZ level of theory. ....                     | 54 |
| <b>Table S69.</b> Cartesian coordinates (in Angstrom, Å) of the hydrogen bond configuration change transition state ( <b>TS_HB</b> ) for the hydrolysis reaction fully optimized at the B3LYP/aTZ level of theory. .... | 54 |
| <b>Table S70.</b> Cartesian coordinates (in Angstrom, Å) of the products with two hydrogen bonds ( <b>P_2HB</b> ) for the hydrolysis reaction fully optimized at the B3LYP/aTZ level of theory. ....                    | 55 |
| <b>Table S71.</b> Cartesian coordinates (in Angstrom, Å) of the synchronous proton transfer transition state ( <b>SPT_TS</b> ) after the hydrolysis reaction fully optimized at the B3LYP/aTZ level of theory. ....     | 55 |
| <b>Table S72.</b> Cartesian coordinates (in Angstrom, Å) of the final product ( <b>P</b> ) after the HCl-catalyzed tautomerization fully optimized at the B3LYP/aTZ level of theory. ....                               | 56 |
| Section 5.4.2. Cartesian Coordinates for chemical species appearing in the tautomerization reaction without the interference from HCl at the B3LYP/aTZ level of theory. ....                                            | 56 |
| <b>Table S73.</b> Cartesian coordinates (in Angstrom, Å) of the reactants of the tautomerization reaction without the interferences of HCl ( <b>Tauto_R</b> ) fully optimized at the B3LYP/aTZ level of theory. ....    | 56 |
| <b>Table S74.</b> Cartesian coordinates (in Angstrom, Å) of the tautomerization transition state without the interferences ( <b>Tauto_TS</b> ) fully optimized at the B3LYP/aTZ of theory. ....                         | 57 |
| <b>Table S75.</b> Cartesian coordinates (in Angstrom, Å) of the product of the tautomerization reaction without the interferences ( <b>Tauto_P</b> ) fully optimized at the B3LYP/aTZ level of theory. ....             | 57 |
| Section 5.4.3. Cartesian Coordinates for chemical species appearing in the ring-opening reaction at the B3LYP/aTZ level of theory. ....                                                                                 | 58 |
| <b>Table S76.</b> Cartesian coordinates (in Angstrom, Å) of the reactants ( <b>R'</b> ) for the HCl-initiated ring-opening reaction fully optimized at the B3LYP/aTZ level of theory. ....                              | 58 |
| <b>Table S77.</b> Cartesian coordinates (in Angstrom, Å) of the transition state ( <b>TS1</b> ) for the HCl-initiated ring-opening reaction fully optimized at the B3LYP/aTZ level of theory. ....                      | 58 |
| <b>Table S78.</b> Cartesian coordinates (in Angstrom, Å) of the intermediate ( <b>Int</b> ) for the HCl-initiated ring-opening reaction fully optimized at the B3LYP/aTZ level of theory. ....                          | 59 |
| <b>Table S79.</b> Cartesian coordinates (in Angstrom, Å) of the transition state ( <b>TS2</b> ) for the HCl-initiated ring-opening reaction fully optimized at the B3LYP/aTZ level of theory. ....                      | 59 |

|                                                                                                                                                                                                                                   |    |
|-----------------------------------------------------------------------------------------------------------------------------------------------------------------------------------------------------------------------------------|----|
| <b>Table S80.</b> Cartesian coordinates (in Angstrom, Å) of the products ( <b>P'</b> ) for the HCl-initiated ring-opening reaction fully optimized at the B3LYP/aTZ level of theory. ....                                         | 60 |
| Section 5.5 Electronic structures fully optimized at the B3PW91/6-311+G(d,p) level of theory.                                                                                                                                     | 60 |
| Section 5.5.1. Cartesian Coordinates for the pivotal structure in the hydrolysis reaction followed by HCl-catalyzed tautomerization at the B3PW91/6-311+G(d,p) level of theory .....                                              | 60 |
| <b>Table S81.</b> Cartesian coordinates (in Angstrom, Å) of the reactants ( <b>R</b> ) for the hydrolysis reaction fully optimized at the B3PW91/6-311+G(d,p) level of theory. ....                                               | 60 |
| <b>Table S82.</b> Cartesian coordinates (in Angstrom, Å) of the transition state ( <b>TS</b> ) for the hydrolysis reaction fully optimized at the B3PW91/6-311+G(d,p) level of theory. ....                                       | 61 |
| <b>Table S83.</b> Cartesian coordinates (in Angstrom, Å) of the products with one hydrogen bond ( <b>P_1HB</b> ) for the hydrolysis reaction fully optimized at the B3PW91/6-311+G(d,p) level of theory. ....                     | 61 |
| <b>Table S84.</b> Cartesian coordinates (in Angstrom, Å) of the hydrogen bond configuration change transition state ( <b>TS_HB</b> ) for the hydrolysis reaction fully optimized at the B3PW91/6-311+G(d,p) level of theory. .... | 62 |
| <b>Table S85.</b> Cartesian coordinates (in Angstrom, Å) of the products with two hydrogen bonds ( <b>P_2HB</b> ) for the hydrolysis reaction fully optimized at the B3PW91/6-311+G(d,p) level of theory. ....                    | 62 |
| <b>Table S86.</b> Cartesian coordinates (in Angstrom, Å) of the synchronous proton transfer transition state ( <b>SPT_TS</b> ) after the hydrolysis reaction fully optimized at the B3PW91/6-311+G(d,p) level of theory. ....     | 63 |
| <b>Table S87.</b> Cartesian coordinates (in Angstrom, Å) of the final product ( <b>P</b> ) after the HCl-catalyzed tautomerization fully optimized at the B3PW91/6-311+G(d,p) level of theory.....                                | 63 |
| Section 5.5.2. Cartesian Coordinates for chemical species appearing in the tautomerization reaction without the interference from HCl at the B3PW91/6-311+G(d,p) level of theory .....                                            | 64 |
| <b>Table S88.</b> Cartesian coordinates (in Angstrom, Å) of the reactants of the tautomerization reaction without the interferences of HCl ( <b>Tauto_R</b> ) fully optimized at the B3PW91/6-311+G(d,p) level of theory. ....    | 64 |
| <b>Table S89.</b> Cartesian coordinates (in Angstrom, Å) of the tautomerization transition state without the interferences ( <b>Tauto_TS</b> ) fully optimized at the B3PW91/6-311+G(d,p) of theory. ....                         | 64 |
| <b>Table S90.</b> Cartesian coordinates (in Angstrom, Å) of the product of the tautomerization reaction without the interferences ( <b>Tauto_P</b> ) fully optimized at the B3PW91/6-311+G(d,p) level of theory. ....             | 65 |
| Section 5.5.3. Cartesian Coordinates for chemical species appearing in the ring-opening reaction at the B3PW91/6-311+G(d,p) level of theory .....                                                                                 | 65 |

|                                                                                                                                                                                                                                            |    |
|--------------------------------------------------------------------------------------------------------------------------------------------------------------------------------------------------------------------------------------------|----|
| <b>Table S91.</b> Cartesian coordinates (in Angstrom, Å) of the reactants ( <b>R'</b> ) for the HCl-initiated ring-opening reaction fully optimized at the B3PW91/6-311+G(d,p) level of theory. ....                                       | 65 |
| <b>Table S92.</b> Cartesian coordinates (in Angstrom, Å) of the transition state ( <b>TS1</b> ) for the HCl-initiated ring-opening reaction fully optimized at the B3PW91/6-311+G(d,p) level of theory. ....                               | 66 |
| <b>Table S93.</b> Cartesian coordinates (in Angstrom, Å) of the intermediate ( <b>Int</b> ) for the HCl-initiated ring-opening reaction fully optimized at the B3PW91/6-311+G(d,p) level of theory. ....                                   | 66 |
| <b>Table S94.</b> Cartesian coordinates (in Angstrom, Å) of the transition state ( <b>TS2</b> ) for the HCl-initiated ring-opening reaction fully optimized at the B3PW91/6-311+G(d,p) level of theory. ....                               | 67 |
| <b>Table S95.</b> Cartesian coordinates (in Angstrom, Å) of the products ( <b>P'</b> ) for the HCl-initiated ring-opening reaction fully optimized at the B3PW91/6-311+G(d,p) level of theory. ....                                        | 67 |
| Section 5.6 Electronic structures fully optimized at the $\omega$ B97X-D/6-311+G(d,p) level of theory .....                                                                                                                                | 68 |
| Section 5.6.1. Cartesian Coordinates for the pivotal structure in the hydrolysis reaction followed by HCl-catalyzed tautomerization at the $\omega$ B97X-D /6-311+G(d,p) level of theory .....                                             | 68 |
| <b>Table S96.</b> Cartesian coordinates (in Angstrom, Å) of the reactants ( <b>R</b> ) for the hydrolysis reaction fully optimized at the $\omega$ B97X-D/6-311+G(d,p) level of theory. ....                                               | 68 |
| <b>Table S97.</b> Cartesian coordinates (in Angstrom, Å) of the transition state ( <b>TS</b> ) for the hydrolysis reaction fully optimized at the $\omega$ B97X-D/6-311+G(d,p) level of theory. ....                                       | 68 |
| <b>Table S98.</b> Cartesian coordinates (in Angstrom, Å) of the products with one hydrogen bond ( <b>P_1HB</b> ) for the hydrolysis reaction fully optimized at the $\omega$ B97X-D/6-311+G(d,p) level of theory. ....                     | 69 |
| <b>Table S99.</b> Cartesian coordinates (in Angstrom, Å) of the hydrogen bond configuration change transition state ( <b>TS_HB</b> ) for the hydrolysis reaction fully optimized at the $\omega$ B97X-D/6-311+G(d,p) level of theory. .... | 69 |
| <b>Table S100.</b> Cartesian coordinates (in Angstrom, Å) of the products with two hydrogen bonds ( <b>P_2HB</b> ) for the hydrolysis reaction fully optimized at the $\omega$ B97X-D/6-311+G(d,p) level of theory. ....                   | 70 |
| <b>Table S101.</b> Cartesian coordinates (in Angstrom, Å) of the synchronous proton transfer transition state ( <b>SPT_TS</b> ) after the hydrolysis reaction fully optimized at the $\omega$ B97X-D/6-311+G(d,p) level of theory. ....    | 70 |
| <b>Table S102.</b> Cartesian coordinates (in Angstrom, Å) of the final product ( <b>P</b> ) after the HCl-catalyzed tautomerization fully optimized at the $\omega$ B97X-D/6-311+G(d,p) level of theory. ....                              | 71 |

|                                                                                                                                                                                                                                          |    |
|------------------------------------------------------------------------------------------------------------------------------------------------------------------------------------------------------------------------------------------|----|
| Section 5.6.2. Cartesian Coordinates for chemical species appearing in the tautomerization reaction without the interference from HCl at the $\omega$ B97X-D/6-311+G(d,p) level of theory .....                                          | 71 |
| <b>Table S103.</b> Cartesian coordinates (in Angstrom, Å) of the reactants of the tautomerization reaction without the interferences of HCl ( <b>Tauto_R</b> ) fully optimized at the $\omega$ B97X-D/6-311+G(d,p) level of theory. .... | 71 |
| <b>Table S104.</b> Cartesian coordinates (in Angstrom, Å) of the tautomerization transition state without the interferences ( <b>Tauto_TS</b> ) fully optimized at the $\omega$ B97X-D/6-311+G(d,p) of theory. ....                      | 72 |
| <b>Table S105.</b> Cartesian coordinates (in Angstrom, Å) of the product of the tautomerization reaction without the interferences ( <b>Tauto_P</b> ) fully optimized at the $\omega$ B97X-D/6-311+G(d,p) level of theory. ....          | 72 |
| Section 5.6.3. Cartesian Coordinates for chemical species appearing in the ring-opening reaction at the $\omega$ B97X-D/6-311+G(d,p) level of theory .....                                                                               | 73 |
| <b>Table S106.</b> Cartesian coordinates (in Angstrom, Å) of the reactants ( <b>R'</b> ) for the HCl-initiated ring-opening reaction fully optimized at the $\omega$ B97X-D/6-311+G(d,p) level of theory. ....                           | 73 |
| <b>Table S107.</b> Cartesian coordinates (in Angstrom, Å) of the transition state ( <b>TS1</b> ) for the HCl-initiated ring-opening reaction fully optimized at the $\omega$ B97X-D/6-311+G(d,p) level of theory. ....                   | 73 |
| <b>Table S108.</b> Cartesian coordinates (in Angstrom, Å) of the intermediate ( <b>Int</b> ) for the HCl-initiated ring-opening reaction fully optimized at the $\omega$ B97X-D/6-311+G(d,p) level of theory. ....                       | 74 |
| <b>Table S109.</b> Cartesian coordinates (in Angstrom, Å) of the transition state ( <b>TS2</b> ) for the HCl-initiated ring-opening reaction fully optimized at the $\omega$ B97X-D/6-311+G(d,p) level of theory. ....                   | 74 |
| <b>Table S110.</b> Cartesian coordinates (in Angstrom, Å) of the products ( <b>P'</b> ) for the HCl-initiated ring-opening reaction fully optimized at the $\omega$ B97X-D/6-311+G(d,p) level of theory. ....                            | 75 |
| Section 5.7 Electronic structures fully optimized at the M06-2X/6-311+G(d,p) level of theory ..                                                                                                                                          | 75 |
| Section 5.7.1. Cartesian Coordinates for the pivotal structure in the hydrolysis reaction followed by HCl-catalyzed tautomerization at the M06-2X/6-311+G(d,p) level of theory .....                                                     | 75 |
| <b>Table S111.</b> Cartesian coordinates (in Angstrom, Å) of the reactants ( <b>R</b> ) for the hydrolysis reaction fully optimized at the M06-2X/6-311+G(d,p) level of theory. ....                                                     | 75 |
| <b>Table S112.</b> Cartesian coordinates (in Angstrom, Å) of the transition state ( <b>TS*</b> ) for the hydrolysis reaction fully optimized at the M06-2X/6-311+G(d,p) level of theory. ....                                            | 76 |
| <b>Table S113.</b> Cartesian coordinates (in Angstrom, Å) of the products with one hydrogen bond ( <b>P_1HB*</b> ) for the hydrolysis reaction fully optimized at the M06-2X/6-311+G(d,p) level of theory. ....                          | 76 |

|                                                                                                                                                                                                                                    |    |
|------------------------------------------------------------------------------------------------------------------------------------------------------------------------------------------------------------------------------------|----|
| <b>Table S114.</b> Cartesian coordinates (in Angstrom, Å) of the hydrogen bond configuration change transition state ( <b>TS_HB</b> ) for the hydrolysis reaction fully optimized at the M06-2X/6-311+G(d,p) level of theory. .... | 77 |
| <b>Table S115.</b> Cartesian coordinates (in Angstrom, Å) of the products with two hydrogen bonds ( <b>P_2HB</b> ) for the hydrolysis reaction fully optimized at the M06-2X/6-311+G(d,p) level of theory. ....                    | 77 |
| <b>Table S116.</b> Cartesian coordinates (in Angstrom, Å) of the synchronous proton transfer transition state ( <b>SPT_TS</b> ) after the hydrolysis reaction fully optimized at the M06-2X/6-311+G(d,p) level of theory. ....     | 78 |
| <b>Table S117.</b> Cartesian coordinates (in Angstrom, Å) of the final product ( <b>P</b> ) after the HCl-catalyzed tautomerization fully optimized at the M06-2X/6-311+G(d,p) level of theory. ....                               | 78 |
| Section 5.7.2. Cartesian Coordinates for chemical species appearing in the tautomerization reaction without the interference from HCl at the M06-2X/6-311+G(d,p) level of theory.....                                              | 79 |
| <b>Table S118.</b> Cartesian coordinates (in Angstrom, Å) of the reactants of the tautomerization reaction without the interferences of HCl ( <b>Tauto_R</b> ) fully optimized at the M06-2X/6-311+G(d,p) level of theory. ....    | 79 |
| <b>Table S119.</b> Cartesian coordinates (in Angstrom, Å) of the tautomerization transition state without the interferences ( <b>Tauto_TS</b> ) fully optimized at the M06-2X/6-311+G(d,p) of theory. ....                         | 79 |
| <b>Table S120.</b> Cartesian coordinates (in Angstrom, Å) of the product of the tautomerization reaction without the interferences ( <b>Tauto_P</b> ) fully optimized at the M06-2X/6-311+G(d,p) level of theory. ....             | 80 |
| Section 5.7.3. Cartesian Coordinates for chemical species appearing in the ring-opening reaction at the M06-2X/6-311+G(d,p) level of theory .....                                                                                  | 80 |
| <b>Table S121.</b> Cartesian coordinates (in Angstrom, Å) of the reactants ( <b>R'</b> ) for the HCl-initiated ring-opening reaction fully optimized at the M06-2X/6-311+G(d,p) level of theory. ....                              | 80 |
| <b>Table S122.</b> Cartesian coordinates (in Angstrom, Å) of the transition state ( <b>TS1</b> ) for the HCl-initiated ring-opening reaction fully optimized at the M06-2X/6-311+G(d,p) level of theory. ....                      | 81 |
| <b>Table S123.</b> Cartesian coordinates (in Angstrom, Å) of the intermediate ( <b>Int</b> ) for the HCl-initiated ring-opening reaction fully optimized at the M06-2X/6-311+G(d,p) level of theory. ....                          | 81 |
| <b>Table S124.</b> Cartesian coordinates (in Angstrom, Å) of the transition state ( <b>TS2</b> ) for the HCl-initiated ring-opening reaction fully optimized at the M06-2X/6-311+G(d,p) level of theory. ....                      | 82 |
| <b>Table S125.</b> Cartesian coordinates (in Angstrom, Å) of the products ( <b>P'</b> ) for the HCl-initiated ring-opening reaction fully optimized at the M06-2X/6-311+G(d,p) level of theory. ....                               | 82 |
| Section 5.8 Electronic structures fully optimized at the cam-B3LYP/6-311+G(d,p) level of theory .....                                                                                                                              | 83 |

Section 5.8.1. Cartesian Coordinates for the pivotal structure in the hydrolysis reaction followed by HCl-catalyzed tautomerization at the cam-B3LYP/6-311+G(d,p) level of theory.....83

**Table S126.** Cartesian coordinates (in Angstrom, Å) of the reactants (**R**) for the hydrolysis reaction fully optimized at the cam-B3LYP/6-311+G(d,p) level of theory. ....83

**Table S127.** Cartesian coordinates (in Angstrom, Å) of the transition state (**TS**) for the hydrolysis reaction fully optimized at the cam-B3LYP/6-311+G(d,p) level of theory.....83

**Table S128.** Cartesian coordinates (in Angstrom, Å) of the products with one hydrogen bond (**P\_1HB**) for the hydrolysis reaction fully optimized at the cam-B3LYP/6-311+G(d,p) level of theory. ....84

**Table S129.** Cartesian coordinates (in Angstrom, Å) of the hydrogen bond configuration change transition state (**TS\_HB**) for the hydrolysis reaction fully optimized at the cam-B3LYP/6-311+G(d,p) level of theory.....84

**Table S130.** Cartesian coordinates (in Angstrom, Å) of the products with two hydrogen bonds (**P\_2HB**) for the hydrolysis reaction fully optimized at the cam-B3LYP/6-311+G(d,p) level of theory. ....85

**Table S131.** Cartesian coordinates (in Angstrom, Å) of the synchronous proton transfer transition state (**SPT\_TS**) after the hydrolysis reaction fully optimized at the cam-B3LYP/6-311+G(d,p) level of theory. ....85

**Table S132.** Cartesian coordinates (in Angstrom, Å) of the final product (**P**) after the HCl-catalyzed tautomerization fully optimized at the cam-B3LYP/6-311+G(d,p) level of theory. .86

Section 5.8.2. Cartesian Coordinates for chemical species appearing in the tautomerization reaction without the interference from HCl at the cam-B3LYP/6-311+G(d,p) level of theory ....86

**Table S133.** Cartesian coordinates (in Angstrom, Å) of the reactants of the tautomerization reaction without the interferences of HCl (**Tauto\_R**) fully optimized at the cam-B3LYP/6-311+G(d,p) level of theory. ....86

**Table S134.** Cartesian coordinates (in Angstrom, Å) of the tautomerization transition state without the interferences (**Tauto\_TS**) fully optimized at the cam-B3LYP/6-311+G(d,p) of theory. ....87

**Table S135.** Cartesian coordinates (in Angstrom, Å) of the product of the tautomerization reaction without the interferences (**Tauto\_P**) fully optimized at the cam-B3LYP/6-311+G(d,p) level of theory. ....87

Section 5.8.3. Cartesian Coordinates for chemical species appearing in the ring-opening reaction at the cam-B3LYP/6-311+G(d,p) level of theory .....88

**Table S136.** Cartesian coordinates (in Angstrom, Å) of the reactants (**R'**) for the HCl-initiated ring-opening reaction fully optimized at the cam-B3LYP/6-311+G(d,p) level of theory.....88

|                                                                                                                                                                                                                                  |    |
|----------------------------------------------------------------------------------------------------------------------------------------------------------------------------------------------------------------------------------|----|
| <b>Table S137.</b> Cartesian coordinates (in Angstrom, Å) of the transition state ( <b>TS1</b> ) for the HCl-initiated ring-opening reaction fully optimized at the cam-B3LYP/6-311+G(d,p) level of theory. ....                 | 88 |
| <b>Table S138.</b> Cartesian coordinates (in Angstrom, Å) of the intermediate ( <b>Int</b> ) for the HCl-initiated ring-opening reaction fully optimized at the cam-B3LYP/6-311+G(d,p) level of theory. ....                     | 89 |
| <b>Table S139.</b> Cartesian coordinates (in Angstrom, Å) of the transition state ( <b>TS2</b> ) for the HCl-initiated ring-opening reaction fully optimized at the cam-B3LYP/6-311+G(d,p) level of theory. ....                 | 89 |
| <b>Table S140.</b> Cartesian coordinates (in Angstrom, Å) of the products ( <b>P'</b> ) for the HCl-initiated ring-opening reaction fully optimized at the cam-B3LYP/6-311+G(d,p) level of theory. ....                          | 90 |
| Section 5.9 Electronic structures fully optimized at the PBE0/6-311+G(d,p) level of theory .....                                                                                                                                 | 90 |
| Section 5.9.1. Cartesian Coordinates for the pivotal structure in the hydrolysis reaction followed by HCl-catalyzed tautomerization at the PBE0/6-311+G(d,p) level of theor .....                                                | 90 |
| <b>Table S141.</b> Cartesian coordinates (in Angstrom, Å) of the reactants ( <b>R</b> ) for the hydrolysis reaction fully optimized at the PBE0/6-311+G(d,p) level of theory. ....                                               | 90 |
| <b>Table S142.</b> Cartesian coordinates (in Angstrom, Å) of the transition state ( <b>TS</b> ) for the hydrolysis reaction fully optimized at the PBE0/6-311+G(d,p) level of theory.....                                        | 91 |
| <b>Table S143.</b> Cartesian coordinates (in Angstrom, Å) of the products with one hydrogen bond ( <b>P_1HB</b> ) for the hydrolysis reaction fully optimized at the PBE0/6-311+G(d,p) level of theory. ....                     | 91 |
| <b>Table S144.</b> Cartesian coordinates (in Angstrom, Å) of the hydrogen bond configuration change transition state ( <b>TS_HB</b> ) for the hydrolysis reaction fully optimized at the PBE0/6-311+G(d,p) level of theory. .... | 92 |
| <b>Table S145.</b> Cartesian coordinates (in Angstrom, Å) of the products with two hydrogen bonds ( <b>P_2HB</b> ) for the hydrolysis reaction fully optimized at the PBE0/6-311+G(d,p) level of theory. ....                    | 92 |
| <b>Table S146.</b> Cartesian coordinates (in Angstrom, Å) of the synchronous proton transfer transition state ( <b>SPT_TS</b> ) after the hydrolysis reaction fully optimized at the PBE0/6-311+G(d,p) level of theory. ....     | 93 |
| <b>Table S147.</b> Cartesian coordinates (in Angstrom, Å) of the final product ( <b>P</b> ) after the HCl-catalyzed tautomerization fully optimized at the PBE0/6-311+G(d,p) level of theory. ....                               | 93 |
| Section 5.9.2. Cartesian Coordinates for chemical species appearing in the tautomerization reaction without the interference from HCl at the PBE0/6-311+G(d,p) level of theory .....                                             | 94 |

|                                                                                                                                                                                                                               |    |
|-------------------------------------------------------------------------------------------------------------------------------------------------------------------------------------------------------------------------------|----|
| <b>Table S148.</b> Cartesian coordinates (in Angstrom, Å) of the reactants of the tautomerization reaction without the interferences of HCl ( <b>Tauto_R</b> ) fully optimized at the PBE0/6-311+G(d,p) level of theory. .... | 94 |
| <b>Table S149.</b> Cartesian coordinates (in Angstrom, Å) of the tautomerization transition state without the interferences ( <b>Tauto_TS</b> ) fully optimized at the PBE0/6-311+G(d,p) of theory. .                         | 94 |
| <b>Table S150.</b> Cartesian coordinates (in Angstrom, Å) of the product of the tautomerization reaction without the interferences ( <b>Tauto_P</b> ) fully optimized at the PBE0/6-311+G(d,p) level of theory. ....          | 95 |
| Section 5.9.3. Cartesian Coordinates for chemical species appearing in the ring-opening reaction at the PBE0/6-311+G(d,p) level of theory. ....                                                                               | 95 |
| <b>Table S151.</b> Cartesian coordinates (in Angstrom, Å) of the reactants ( <b>R'</b> ) for the HCl-initiated ring-opening reaction fully optimized at the PBE0/6-311+G(d,p) level of theory. ....                           | 95 |
| <b>Table S152.</b> Cartesian coordinates (in Angstrom, Å) of the transition state ( <b>TS1</b> ) for the HCl-initiated ring-opening reaction fully optimized at the PBE0/6-311+G(d,p) level of theory. ....                   | 96 |
| <b>Table S153.</b> Cartesian coordinates (in Angstrom, Å) of the intermediate ( <b>Int</b> ) for the HCl-initiated ring-opening reaction fully optimized at the PBE0/6-311+G(d,p) level of theory. ....                       | 96 |
| <b>Table S155.</b> Cartesian coordinates (in Angstrom, Å) of the products ( <b>P'</b> ) for the HCl-initiated ring-opening reaction fully optimized at the PBE0/6-311+G(d,p) level of theory. ....                            | 97 |

**Section 1. Selected paths and activation energies for critical steps in the reaction of chlorophosphazene with H<sub>2</sub>O and HCl determined at different levels of QM theories and their accuracy when compared to the results at the CCSD(T)/aTZ||MP2/aTZ level of theory**

**Table S1.** The activation energy ( $E_a$ , in kJ/mol) for the hydrolysis and tautomerization catalyzed by HCl, determined at different DFT levels of theory, the MP2/aXZ levels of theory where X = D, T and Q and the CCSD(T)/aTZ level of theory.

| Theory              | DFT    |              |          |        |                 |        |           |        | <i>ab initio</i> |        |                  |                  |
|---------------------|--------|--------------|----------|--------|-----------------|--------|-----------|--------|------------------|--------|------------------|------------------|
|                     | B3LYP  |              | B3LYP-D3 | B3PW91 | $\omega$ B97X-D | M06-2X | cam-B3LYP | PBE0   | MP2              |        | CCSD(T)          |                  |
| F/M <sup>a</sup>    |        |              |          |        |                 |        |           |        |                  |        |                  |                  |
| C/B <sup>b</sup>    | aTZ    | 6-311+G(d,p) |          |        |                 |        |           |        | aDZ              | aTZ    | aQZ <sup>c</sup> | aTZ <sup>c</sup> |
| R                   | N/A    | N/A          | N/A      | N/A    | N/A             | N/A    | N/A       | N/A    | N/A              | N/A    | N/A              | N/A              |
| TS <sup>c</sup>     | 186.84 | 187.42       | 166.96   | 186.11 | 201.28          | 182.70 | 193.57    | 185.76 | 154.40           | 173.20 | 177.33           | 180.99           |
| P_1HB <sup>c</sup>  | N/A    | N/A          | N/A      | N/A    | N/A             | N/A    | N/A       | N/A    | N/A              | N/A    | N/A              | N/A              |
| TS_HB               | 1.04   | 1.26         | 1.18     | 1.13   | 0.03            | 1.77   | 0.96      | 0.57   | 0.01             | N/A    | N/A              | N/A              |
| P_2HB               | N/A    | N/A          | N/A      | N/A    | N/A             | N/A    | N/A       | N/A    | N/A              | N/A    | N/A              | N/A              |
| SPT_TS <sup>c</sup> | 14.79  | 15.92        | 13.73    | 11.40  | 17.93           | 15.09  | 15.73     | 10.44  | 16.91            | 16.47  | 16.14            | 20.09            |
| P                   | N/A    | N/A          | N/A      | N/A    | N/A             | N/A    | N/A       | N/A    | N/A              | N/A    | N/A              | N/A              |

<sup>a</sup>Functional or method. <sup>b</sup>Not found using the computational software <sup>c</sup>Stationary points have different electronic structures at the M06-2X/6-311+G(d,p) level of theory when compared to the structures characterized at the other levels of theory.

<sup>d</sup>Single-point energies completed based on the electronic structures fully optimized at the MP2/aTZ level of theory

**Table S2.** The activation energy ( $E_a$ , in kJ/mol) for the tautomerization reaction without interference, determined at different DFT levels of theory, the MP2/aXZ levels of theory where X = D, T and Q and the CCSD(T)/aTZ level of theory.

| Theory           | DFT    |              |          |        |                 |        |           |        | <i>ab initio</i> |        |                  |                  |
|------------------|--------|--------------|----------|--------|-----------------|--------|-----------|--------|------------------|--------|------------------|------------------|
|                  | B3LYP  |              | B3LYP-D3 | B3PW91 | $\omega$ B97X-D | M06-2X | cam-B3LYP | PBE0   | MP2              |        | CCSD(T)          |                  |
| F/M <sup>a</sup> |        |              |          |        |                 |        |           |        |                  |        |                  |                  |
| C/B <sup>b</sup> | aTZ    | 6-311+G(d,p) |          |        |                 |        |           |        | aDZ              | aTZ    | aQZ <sup>c</sup> | aTZ <sup>c</sup> |
| Tauto_R          | N/A    | N/A          | N/A      | N/A    | N/A             | N/A    | N/A       | N/A    | N/A              | N/A    | N/A              | N/A              |
| Tauto_TS         | 143.76 | 143.03       | 142.55   | 136.92 | 146.56          | 148.76 | 147.49    | 138.19 | 139.91           | 139.01 | 139.84           | 146.24           |
| Tauto_P          | N/A    | N/A          | N/A      | N/A    | N/A             | N/A    | N/A       | N/A    | N/A              | N/A    | N/A              | N/A              |

<sup>a</sup>Functional or method <sup>b</sup>Compound and basis set <sup>c</sup>Single-point energies completed based on the electronic structures fully optimized at the MP2/aTZ level of theory

**Table S3.** The activation energy ( $E_a$ , in kJ/mol) for the ring-opening reaction initiated by HCl, determined at different DFT levels of theory, the MP2/aXZ levels of theory where X = D, T and Q and the CCSD(T)/aTZ level of theory.

| Theory           | DFT    |              |          |        |                 |        |           |        | <i>ab initio</i> |        |                  |                  |
|------------------|--------|--------------|----------|--------|-----------------|--------|-----------|--------|------------------|--------|------------------|------------------|
|                  | B3LYP  |              | B3LYP-D3 | B3PW91 | $\omega$ B97X-D | M06-2X | cam-B3LYP | PBE0   | MP2              |        | CCSD(T)          |                  |
| F/M <sup>a</sup> |        |              |          |        |                 |        |           |        |                  |        |                  |                  |
| C/B <sup>b</sup> | aTZ    | 6-311+G(d,p) |          |        |                 |        |           |        | aDZ              | aTZ    | aQZ <sup>c</sup> | aTZ <sup>c</sup> |
| R <sup>c</sup>   | N/A    | N/A          | N/A      | N/A    | N/A             | N/A    | N/A       | N/A    | N/A              | N/A    | N/A              | N/A              |
| TS1 <sup>c</sup> | 116.13 | 115.84       | 109.04   | 113.13 | 124.00          | 113.06 | 121.45    | 111.75 | 111.00           | 116.48 | 117.33           | 118.82           |
| Int <sup>c</sup> | N/A    | N/A          | N/A      | N/A    | N/A             | N/A    | N/A       | N/A    | N/A              | N/A    | N/A              | N/A              |
| TS2 <sup>c</sup> | 10.41  | 7.53         | 8.51     | 7.25   | 8.55            | 8.94   | 8.99      | 7.87   | 13.08            | 13.43  | 14.50            | 12.23            |
| P <sup>c</sup>   | N/A    | N/A          | N/A      | N/A    | N/A             | N/A    | N/A       | N/A    | N/A              | N/A    | N/A              | N/A              |

<sup>a</sup>Functional or method <sup>b</sup>Compound and basis set <sup>c</sup>Single-point energies completed based on the electronic structures fully optimized at the MP2/aTZ level of theory

**Table S4.** The percent of energy deviation (%) of hydrolysis and tautomerization catalyzed by HCl, determined at different DFT levels of theory, the MP2/aXZ levels of theory where X = D, T and Q compared with the results obtained at the CCSD(T)/aTZ||MP2/aTZ level of theory.

| Theory                    | DFT              |              |          |        |         |        |           |       | <i>ab initio</i> |       |                  |                  |
|---------------------------|------------------|--------------|----------|--------|---------|--------|-----------|-------|------------------|-------|------------------|------------------|
|                           | F/M <sup>a</sup> | B3LYP        | B3LYP-D3 | B3PW91 | ωB97X-D | M06-2X | cam-B3LYP | PBE0  | MP2              |       |                  | CCSD(T)          |
| C/B <sup>b</sup>          | aTZ              | 6-311+G(d,p) |          |        |         |        |           |       | aDZ              | aTZ   | aQZ <sup>c</sup> | aTZ <sup>c</sup> |
| <b>R</b>                  | N/A              | N/A          | N/A      | N/A    | N/A     | N/A    | N/A       | N/A   | N/A              | N/A   | N/A              | N/A              |
| <b>TS<sup>c</sup></b>     | 3.2              | 3.6          | -7.8     | 2.8    | 11.2    | 0.9    | 7.0       | 2.6   | -14.7            | -4.3  | -2.0             | N/A              |
| <b>P_1HB<sup>b</sup></b>  | -3.3             | -10.8        | -16.4    | -20.9  | -15.7   | 16.0   | 8.1       | -22.2 | -32.8            | -15.4 | -15.1            | N/A              |
| <b>TS_HB</b>              | N/A              | N/A          | N/A      | N/A    | N/A     | N/A    | N/A       | N/A   | N/A              | N/A   | N/A              | N/A              |
| <b>P_2HB</b>              | -8.7             | -12.6        | -9.8     | -15.7  | -8.0    | -1.6   | 3.5       | -11.1 | -28.9            | -6.8  | -6.6             | N/A              |
| <b>SPT_TS<sup>c</sup></b> | 2.0              | -7.6         | 3.4      | 0.9    | -6.3    | 12.5   | 18.7      | 11.1  | -36.7            | -0.1  | 1.3              | N/A              |
| <b>P</b>                  | 0.3              | 9.9          | 11.0     | 0.4    | 8.0     | 3.8    | 21.9      | 1.5   | -27.6            | -7.7  | -7.7             | N/A              |

<sup>a</sup>Functional or method. <sup>b</sup>Not found using the computational software <sup>c</sup>Stationary points have different electronic structures at the M06-2X/6-311+G(d,p) level of theory when compared to the structures characterized at the other levels of theory.

<sup>d</sup>Single-point energies completed based on the electronic structures fully optimized at the MP2/aTZ level of theory

**Table S5.** The percent of energy deviation (%) of the tautomerization reaction without interference, determined at different DFT levels of theory, the MP2/aXZ levels of theory where X = D, T and Q compared with the results obtained at the CCSD(T)/aTZ||MP2/aTZ level of theory.

| Theory           | DFT              |              |          |        |         |        |           |        | <i>ab initio</i> |      |                  |                  |
|------------------|------------------|--------------|----------|--------|---------|--------|-----------|--------|------------------|------|------------------|------------------|
|                  | F/M <sup>a</sup> | B3LYP        | B3LYP-D3 | B3PW91 | ωB97X-D | M06-2X | cam-B3LYP | PBE0   | MP2              |      |                  | CCSD(T)          |
| C/B <sup>b</sup> | aTZ              | 6-311+G(d,p) |          |        |         |        |           |        | aDZ              | aTZ  | aQZ <sup>c</sup> | aTZ <sup>c</sup> |
| <b>Tauto_R</b>   | N/A              | N/A          | N/A      | N/A    | N/A     | N/A    | N/A       | N/A    | N/A              | N/A  | N/A              | N/A              |
| <b>Tauto_TS</b>  | -1.7             | -2.2         | -2.5     | -6.4   | 0.2     | 1.7    | 0.9       | -5.5   | -4.3             | -4.9 | -4.4             | N/A              |
| <b>Tauto_P</b>   | -33.5            | -186.8       | -233.5   | -153.7 | -166.0  | -105.2 | -146.9    | -132.8 | 15.1             | -4.5 | 6.2              | N/A              |

<sup>a</sup>Functional or method <sup>b</sup>Compound and basis set <sup>c</sup>Single-point energies completed based on the electronic structures fully optimized at the MP2/aTZ level of theory

**Table S6.** The percent of energy deviation (%) of the ring-opening reaction initiated by HCl, determined at different DFT levels of theory, the MP2/aXZ levels of theory where X = D, T and Q compared with the results obtained at the CCSD(T)/aTZ||MP2/aTZ level of theory.

| Theory                 | DFT              |              |          |        |         |        |           |      | <i>ab initio</i> |      |                  |                  |
|------------------------|------------------|--------------|----------|--------|---------|--------|-----------|------|------------------|------|------------------|------------------|
|                        | F/M <sup>a</sup> | B3LYP        | B3LYP-D3 | B3PW91 | ωB97X-D | M06-2X | cam-B3LYP | PBE0 | MP2              |      |                  | CCSD(T)          |
| C/B <sup>b</sup>       | aTZ              | 6-311+G(d,p) |          |        |         |        |           |      | aDZ              | aTZ  | aQZ <sup>c</sup> | aTZ <sup>c</sup> |
| <b>R<sup>*</sup></b>   | N/A              | N/A          | N/A      | N/A    | N/A     | N/A    | N/A       | N/A  | N/A              | N/A  | N/A              | N/A              |
| <b>TS1<sup>*</sup></b> | -2.3             | -2.5         | -8.2     | -4.8   | 4.4     | -4.8   | 2.2       | -6.0 | -6.6             | -2.0 | -1.3             | N/A              |
| <b>Int<sup>*</sup></b> | 5.0              | 4.0          | -3.9     | -1.1   | 7.8     | -6.8   | 8.0       | -3.9 | -13.3            | -6.3 | -4.5             | N/A              |
| <b>TS2<sup>*</sup></b> | 3.0              | -0.3         | -6.5     | -5.1   | 4.0     | -8.8   | 4.5       | -7.1 | -11.3            | -4.7 | -2.2             | N/A              |
| <b>P<sup>*</sup></b>   | 7.2              | 3.5          | -6.6     | -3.3   | 5.4     | -14.3  | 6.7       | -7.1 | -17.1            | -6.4 | -3.4             | N/A              |

<sup>a</sup>Functional or method <sup>b</sup>Compound and basis set <sup>c</sup>Single-point energies completed based on the electronic structures fully optimized at the MP2/aTZ level of theory

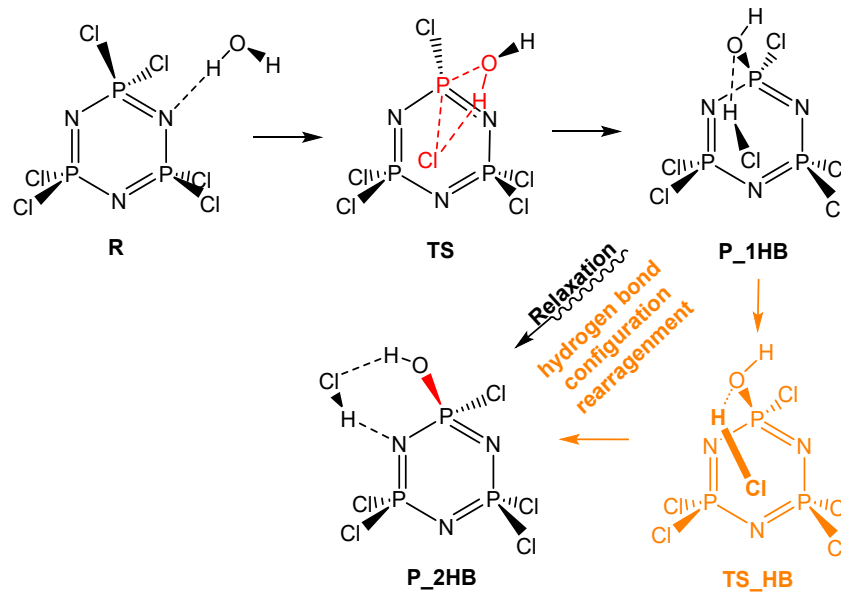

(a).

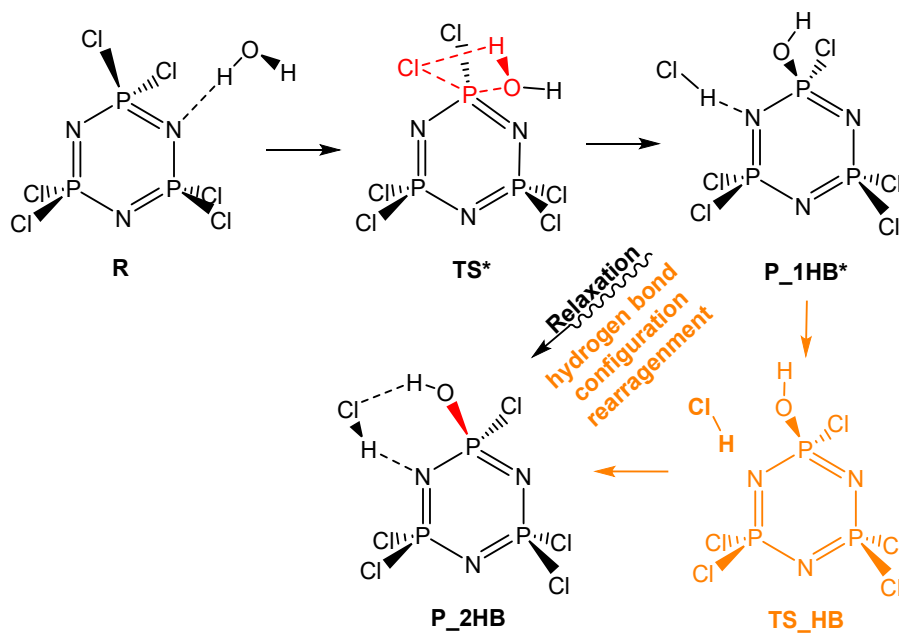

(b).

**Scheme S1.** The stationary point for the hydrolysis reaction characterized at (a), the B3LYP/6-311+G(d,p) level of theory\* and the (b), M06-2X/6-311+G(d,p) level of theory.

\*The stationary points are consistent with the electronic structure characterized at the MP2/aTZ level of theory. The transition state associated with the hydrogen bond configuration rearrangement (TS\_HB, colored in orange) can be identified using the DFT method and at lower levels of theory for MP2 calculations, it could not be found at MP2/aTZ level of theory.

**Section 2. Harmonic vibrational frequencies ( $\omega$  in  $\text{cm}^{-1}$ ) and infrared intensities (IR in  $\text{km mol}^{-1}$ ) for the pivotal energy minima in the reaction mechanisms**

**Table S7.** Harmonic vibrational frequencies ( $\omega$  in  $\text{cm}^{-1}$ ) and infrared intensities (IR intensity in  $\text{km mol}^{-1}$ ) for the reactants (**R**) for the hydrolysis reaction fully optimized at the MP2/aTZ and the B3LYP/6-311+G(d,p) level of theory.

| Level of theory  | MP2/aTZ  |              | B3LYP/6-311+G(d,p) |              |
|------------------|----------|--------------|--------------------|--------------|
| Term/Vibration # | $\omega$ | IR intensity | $\omega$           | IR intensity |
| 1                | 9        | 1.1          | 15                 | 1.3          |
| 2                | 15       | 5.2          | 29                 | 3.0          |
| 3                | 17       | 0.2          | 33                 | 0.0          |
| 4                | 24       | 0.2          | 34                 | 0.2          |
| 5                | 29       | 1.2          | 42                 | 1.4          |
| 6                | 96       | 75.9         | 104                | 88.8         |
| 7                | 117      | 0.0          | 112                | 0.1          |
| 8                | 122      | 0.4          | 116                | 3.0          |
| 9                | 155      | 0.0          | 150                | 0.0          |
| 10               | 155      | 0.0          | 150                | 0.0          |
| 11               | 171      | 0.0          | 168                | 0.0          |
| 12               | 200      | 3.0          | 192                | 0.1          |
| 13               | 200      | 0.0          | 192                | 1.9          |
| 14               | 215      | 3.8          | 210                | 5.5          |
| 15               | 220      | 4.7          | 215                | 5.3          |
| 16               | 277      | 88.7         | 281                | 76.8         |
| 17               | 318      | 0.0          | 308                | 0.0          |
| 18               | 321      | 0.0          | 313                | 0.0          |
| 19               | 329      | 9.5          | 322                | 4.3          |
| 20               | 330      | 14.5         | 328                | 24.4         |
| 21               | 339      | 14.7         | 332                | 6.9          |
| 22               | 365      | 0.0          | 344                | 0.0          |
| 23               | 391      | 3.8          | 380                | 1.9          |
| 24               | 518      | 18.7         | 502                | 238.7        |
| 25               | 545      | 310.8        | 512                | 335.6        |
| 26               | 552      | 288.6        | 552                | 16.7         |
| 27               | 588      | 1.7          | 553                | 1.2          |
| 28               | 592      | 8.9          | 566                | 104.0        |
| 29               | 621      | 526.9        | 605                | 581.0        |
| 30               | 655      | 3.5          | 655                | 1.4          |
| 31               | 788      | 3.1          | 762                | 4.4          |
| 32               | 877      | 8.9          | 843                | 18.9         |
| 33               | 884      | 0.6          | 852                | 3.6          |
| 34               | 1170     | 32.2         | 1115               | 45.5         |
| 35               | 1231     | 1046.6       | 1204               | 1181.2       |
| 36               | 1244     | 1151.9       | 1227               | 1293.8       |
| 37               | 1638     | 28.8         | 1630               | 33.7         |
| 38               | 3713     | 333.9        | 3727               | 332.1        |
| 39               | 3905     | 155.1        | 3889               | 118.5        |

**Table S8.** Harmonic vibrational frequencies ( $\omega$  in  $\text{cm}^{-1}$ ) and infrared intensities (IR intensity in  $\text{km mol}^{-1}$ ) for the product with 1 hydrogen bond (**P\_1HB**) for the hydrolysis reaction fully optimized at the MP2/aTZ and the B3LYP/6-311+G(d,p) level of theory.

| Level of theory<br>Term/Vibration # | MP2/aTZ  |              | B3LYP/6-311+G(d,p) |              |
|-------------------------------------|----------|--------------|--------------------|--------------|
|                                     | $\omega$ | IR intensity | $\omega$           | IR intensity |
| <b>1</b>                            | 31       | 0.3          | 10                 | 0.6          |
| <b>2</b>                            | 35       | 1.3          | 16                 | 0.5          |
| <b>3</b>                            | 40       | 0.9          | 35                 | 0.1          |
| <b>4</b>                            | 41       | 0.2          | 40                 | 0.1          |
| <b>5</b>                            | 49       | 0.8          | 42                 | 0.3          |
| <b>6</b>                            | 76       | 0.5          | 77                 | 1.7          |
| <b>7</b>                            | 117      | 19.0         | 122                | 1.1          |
| <b>8</b>                            | 132      | 9.7          | 154                | 1.4          |
| <b>9</b>                            | 159      | 0.2          | 170                | 11.1         |
| <b>10</b>                           | 177      | 4.3          | 173                | 4.0          |
| <b>11</b>                           | 188      | 0.4          | 188                | 5.9          |
| <b>12</b>                           | 199      | 6.5          | 202                | 2.4          |
| <b>13</b>                           | 211      | 7.0          | 214                | 4.8          |
| <b>14</b>                           | 223      | 5.8          | 245                | 1.3          |
| <b>15</b>                           | 259      | 4.7          | 280                | 14.1         |
| <b>16</b>                           | 291      | 44.2         | 315                | 8.3          |
| <b>17</b>                           | 313      | 40.9         | 321                | 4.3          |
| <b>18</b>                           | 330      | 7.9          | 326                | 2.1          |
| <b>19</b>                           | 336      | 4.3          | 329                | 6.6          |
| <b>20</b>                           | 343      | 4.9          | 333                | 2.4          |
| <b>21</b>                           | 353      | 19.5         | 362                | 22.4         |
| <b>22</b>                           | 388      | 25.8         | 384                | 33.9         |
| <b>23</b>                           | 401      | 19.1         | 390                | 15.0         |
| <b>24</b>                           | 419      | 13.6         | 409                | 28.4         |
| <b>25</b>                           | 540      | 272.9        | 510                | 340.1        |
| <b>26</b>                           | 556      | 234.0        | 531                | 258.9        |
| <b>27</b>                           | 586      | 24.3         | 551                | 2.6          |
| <b>28</b>                           | 611      | 482.5        | 591                | 464.1        |
| <b>29</b>                           | 646      | 4.7          | 641                | 44.4         |
| <b>30</b>                           | 768      | 75.1         | 743                | 83.0         |
| <b>31</b>                           | 867      | 46.5         | 835                | 65.6         |
| <b>32</b>                           | 882      | 12.5         | 855                | 18.4         |
| <b>33</b>                           | 947      | 109.4        | 917                | 157.5        |
| <b>34</b>                           | 1059     | 100.8        | 1046               | 126.4        |
| <b>35</b>                           | 1177     | 2.3          | 1130               | 4.3          |
| <b>36</b>                           | 1237     | 1030.1       | 1217               | 1248.1       |
| <b>37</b>                           | 1245     | 926.5        | 1230               | 1123.7       |
| <b>38</b>                           | 2982     | 111.0        | 2853               | 355.8        |
| <b>39</b>                           | 3785     | 165.7        | 3797               | 167.8        |

**Table S9.** Harmonic vibrational frequencies ( $\omega$  in  $\text{cm}^{-1}$ ) and infrared intensities (IR intensity in  $\text{km mol}^{-1}$ ) for the product with 2 hydrogen bonds (**P\_2HB**) for the hydrolysis reaction fully optimized at the MP2/aTZ and the B3LYP/6-311+G(d,p) level of theory.

| Level of theory<br>Term/Vibration # | MP2/aTZ  |              | B3LYP/6-311+G(d,p) |              |
|-------------------------------------|----------|--------------|--------------------|--------------|
|                                     | $\omega$ | IR intensity | $\omega$           | IR intensity |
| 1                                   | 17       | 0.0          | 21                 | 0.1          |
| 2                                   | 22       | 0.0          | 35                 | 0.1          |
| 3                                   | 29       | 0.2          | 39                 | 0.2          |
| 4                                   | 32       | 0.2          | 42                 | 0.7          |
| 5                                   | 74       | 5.3          | 63                 | 3.9          |
| 6                                   | 113      | 5.3          | 101                | 5.6          |
| 7                                   | 129      | 0.5          | 122                | 1.0          |
| 8                                   | 159      | 0.1          | 155                | 0.1          |
| 9                                   | 185      | 1.8          | 175                | 2.5          |
| 10                                  | 185      | 0.1          | 180                | 0.3          |
| 11                                  | 206      | 0.7          | 198                | 1.2          |
| 12                                  | 215      | 2.6          | 206                | 2.9          |
| 13                                  | 256      | 0.7          | 242                | 1.1          |
| 14                                  | 264      | 0.3          | 256                | 0.9          |
| 15                                  | 330      | 6.8          | 321                | 3.1          |
| 16                                  | 337      | 3.9          | 327                | 1.5          |
| 17                                  | 345      | 1.8          | 334                | 0.8          |
| 18                                  | 348      | 16.6         | 335                | 11.5         |
| 19                                  | 363      | 6.1          | 347                | 11.6         |
| 20                                  | 402      | 7.9          | 381                | 6.8          |
| 21                                  | 412      | 26.8         | 394                | 32.3         |
| 22                                  | 444      | 39.7         | 417                | 65.8         |
| 23                                  | 539      | 58.6         | 512                | 331.1        |
| 24                                  | 546      | 292.5        | 520                | 126.4        |
| 25                                  | 564      | 133.5        | 542                | 65.6         |
| 26                                  | 589      | 9.9          | 562                | 35.7         |
| 27                                  | 614      | 462.1        | 597                | 453.1        |
| 28                                  | 640      | 89.9         | 627                | 192.2        |
| 29                                  | 689      | 139.3        | 667                | 69.9         |
| 30                                  | 770      | 85.0         | 744                | 89.6         |
| 31                                  | 868      | 61.0         | 837                | 73.0         |
| 32                                  | 881      | 7.2          | 848                | 10.1         |
| 33                                  | 988      | 108.1        | 947                | 154.7        |
| 34                                  | 1117     | 106.9        | 1056               | 103.7        |
| 35                                  | 1164     | 95.2         | 1115               | 82.2         |
| 36                                  | 1226     | 900.9        | 1201               | 1023.0       |
| 37                                  | 1258     | 1124.3       | 1243               | 1274.2       |
| 38                                  | 2514     | 1420.0       | 2499               | 1184.1       |
| 39                                  | 3598     | 538.8        | 3651               | 431.4        |

**Table S10.** Harmonic vibrational frequencies ( $\omega$  in  $\text{cm}^{-1}$ ) and infrared intensities (IR intensity in  $\text{km mol}^{-1}$ ) for the products (**P**) for the hydrolysis reaction fully optimized at the MP2/aTZ and the B3LYP/6-311+G(d,p) level of theory.

| Level of theory  | MP2/aTZ  |              | B3LYP/6-311+G(d,p) |              |
|------------------|----------|--------------|--------------------|--------------|
| Term/Vibration # | $\omega$ | IR intensity | $\omega$           | IR intensity |
| <b>1</b>         | 19       | 0.0          | 20                 | 0.1          |
| <b>2</b>         | 26       | 0.0          | 37                 | 0.5          |
| <b>3</b>         | 34       | 0.3          | 38                 | 0.3          |
| <b>4</b>         | 50       | 0.0          | 44                 | 0.1          |
| <b>5</b>         | 77       | 6.2          | 53                 | 4.8          |
| <b>6</b>         | 114      | 2.6          | 105                | 3.0          |
| <b>7</b>         | 127      | 3.0          | 121                | 2.5          |
| <b>8</b>         | 161      | 0.5          | 155                | 1.1          |
| <b>9</b>         | 177      | 0.8          | 173                | 0.3          |
| <b>10</b>        | 188      | 4.9          | 181                | 6.1          |
| <b>11</b>        | 199      | 2.0          | 192                | 2.9          |
| <b>12</b>        | 219      | 2.5          | 211                | 0.6          |
| <b>13</b>        | 263      | 41.3         | 249                | 30.5         |
| <b>14</b>        | 280      | 1.5          | 273                | 3.5          |
| <b>15</b>        | 311      | 5.8          | 304                | 2.0          |
| <b>16</b>        | 333      | 6.7          | 324                | 7.2          |
| <b>17</b>        | 343      | 2.9          | 331                | 1.3          |
| <b>18</b>        | 353      | 0.6          | 336                | 0.9          |
| <b>19</b>        | 376      | 22.1         | 358                | 17.7         |
| <b>20</b>        | 411      | 2.3          | 391                | 1.8          |
| <b>21</b>        | 428      | 27.1         | 412                | 32.2         |
| <b>22</b>        | 512      | 44.6         | 500                | 79.4         |
| <b>23</b>        | 538      | 103.0        | 507                | 62.2         |
| <b>24</b>        | 550      | 241.0        | 513                | 277.8        |
| <b>25</b>        | 596      | 4.3          | 552                | 11.3         |
| <b>26</b>        | 604      | 6.1          | 572                | 10.9         |
| <b>27</b>        | 619      | 470.1        | 596                | 538.7        |
| <b>28</b>        | 637      | 78.4         | 611                | 239.5        |
| <b>29</b>        | 706      | 223.3        | 640                | 54.0         |
| <b>30</b>        | 754      | 74.4         | 715                | 122.2        |
| <b>31</b>        | 830      | 33.0         | 792                | 49.9         |
| <b>32</b>        | 876      | 61.2         | 839                | 71.4         |
| <b>33</b>        | 990      | 182.2        | 941                | 190.3        |
| <b>34</b>        | 1208     | 121.3        | 1206               | 207.4        |
| <b>35</b>        | 1239     | 203.9        | 1227               | 393.0        |
| <b>36</b>        | 1282     | 904.7        | 1288               | 1117.8       |
| <b>37</b>        | 1320     | 750.7        | 1335               | 467.1        |
| <b>38</b>        | 2425     | 1257.1       | 2514               | 940.8        |
| <b>39</b>        | 3390     | 620.5        | 3451               | 378.7        |

**Table S11.** Harmonic vibrational frequencies ( $\omega$  in  $\text{cm}^{-1}$ ) and infrared intensities (IR intensity in  $\text{km mol}^{-1}$ ) for the reactants (**R'**) for the HCl-initiated ring-opening reaction fully optimized at the MP2/aTZ and the B3LYP/6-311+G(d,p) level of theory.

| Level of theory<br>Term/Vibration # | MP2/aTZ  |              | B3LYP/6-311+G(d,p) |              |
|-------------------------------------|----------|--------------|--------------------|--------------|
|                                     | $\omega$ | IR intensity | $\omega$           | IR intensity |
| 1                                   | 4        | 0.3          | 8                  | 0.3          |
| 2                                   | 16       | 0.1          | 28                 | 0.6          |
| 3                                   | 18       | 0.5          | 33                 | 0.0          |
| 4                                   | 24       | 0.0          | 33                 | 0.2          |
| 5                                   | 26       | 0.0          | 42                 | 0.2          |
| 6                                   | 95       | 2.6          | 85                 | 2.4          |
| 7                                   | 122      | 0.0          | 115                | 0.0          |
| 8                                   | 155      | 0.0          | 150                | 0.0          |
| 9                                   | 155      | 0.0          | 150                | 0.0          |
| 10                                  | 171      | 0.0          | 168                | 0.0          |
| 11                                  | 199      | 0.2          | 191                | 0.0          |
| 12                                  | 200      | 0.0          | 192                | 0.1          |
| 13                                  | 215      | 3.0          | 210                | 4.1          |
| 14                                  | 222      | 0.7          | 215                | 1.3          |
| 15                                  | 318      | 0.1          | 309                | 0.0          |
| 16                                  | 318      | 0.2          | 311                | 0.4          |
| 17                                  | 321      | 0.0          | 313                | 0.0          |
| 18                                  | 328      | 9.7          | 321                | 4.7          |
| 19                                  | 341      | 18.8         | 333                | 8.4          |
| 20                                  | 366      | 0.0          | 344                | 0.0          |
| 21                                  | 387      | 3.5          | 376                | 0.2          |
| 22                                  | 474      | 1.5          | 486                | 0.1          |
| 23                                  | 537      | 157.8        | 505                | 263.8        |
| 24                                  | 547      | 326.7        | 513                | 357.5        |
| 25                                  | 558      | 115.6        | 555                | 43.6         |
| 26                                  | 590      | 2.3          | 556                | 0.0          |
| 27                                  | 592      | 0.9          | 556                | 4.7          |
| 28                                  | 623      | 526.2        | 609                | 583.9        |
| 29                                  | 657      | 2.4          | 657                | 1.2          |
| 30                                  | 785      | 15.2         | 758                | 18.0         |
| 31                                  | 873      | 26.6         | 839                | 38.5         |
| 32                                  | 885      | 1.2          | 853                | 5.0          |
| 33                                  | 1168     | 51.8         | 1111               | 75.1         |
| 34                                  | 1229     | 986.3        | 1201               | 1112.5       |
| 35                                  | 1246     | 1214.2       | 1229               | 1353.4       |
| 36                                  | 2717     | 1136.9       | 2666               | 917.3        |

**Table S12.** Harmonic vibrational frequencies ( $\omega$  in  $\text{cm}^{-1}$ ) and infrared intensities (IR intensity in  $\text{km mol}^{-1}$ ) for the intermediate (Int') for the HCl-initiated ring-opening reaction fully optimized at the MP2/aTZ and the B3LYP/6-311+G(d,p) level of theory.

| Level of theory<br>Term/Vibration # | MP2/aTZ  |              | B3LYP/6-311+G(d,p) |              |
|-------------------------------------|----------|--------------|--------------------|--------------|
|                                     | $\omega$ | IR intensity | $\omega$           | IR intensity |
| 1                                   | 27       | 0.1          | 2                  | 0.1          |
| 2                                   | 35       | 0.0          | 31                 | 0.1          |
| 3                                   | 56       | 0.2          | 32                 | 0.0          |
| 4                                   | 85       | 0.8          | 76                 | 1.9          |
| 5                                   | 102      | 1.0          | 93                 | 10.3         |
| 6                                   | 134      | 6.8          | 111                | 19.3         |
| 7                                   | 146      | 0.5          | 146                | 1.8          |
| 8                                   | 158      | 0.3          | 152                | 0.5          |
| 9                                   | 178      | 0.5          | 169                | 1.6          |
| 10                                  | 205      | 1.7          | 191                | 0.8          |
| 11                                  | 212      | 1.1          | 198                | 18.9         |
| 12                                  | 250      | 3.9          | 210                | 59.1         |
| 13                                  | 258      | 27.4         | 230                | 0.2          |
| 14                                  | 274      | 8.9          | 250                | 9.0          |
| 15                                  | 286      | 48.4         | 279                | 14.8         |
| 16                                  | 317      | 6.3          | 279                | 1.7          |
| 17                                  | 326      | 8.9          | 315                | 0.2          |
| 18                                  | 346      | 2.9          | 325                | 0.0          |
| 19                                  | 369      | 14.9         | 331                | 1.1          |
| 20                                  | 380      | 2.5          | 349                | 10.5         |
| 21                                  | 422      | 8.9          | 377                | 0.4          |
| 22                                  | 499      | 215.7        | 463                | 268.2        |
| 23                                  | 534      | 264.8        | 507                | 314.2        |
| 24                                  | 548      | 13.8         | 528                | 7.1          |
| 25                                  | 580      | 14.4         | 548                | 8.6          |
| 26                                  | 584      | 66.6         | 583                | 375.2        |
| 27                                  | 619      | 437.2        | 643                | 213.3        |
| 28                                  | 654      | 18.0         | 646                | 24.9         |
| 29                                  | 731      | 41.7         | 707                | 33.6         |
| 30                                  | 789      | 101.2        | 756                | 97.4         |
| 31                                  | 861      | 41.3         | 812                | 27.1         |
| 32                                  | 957      | 240.9        | 903                | 283.7        |
| 33                                  | 1180     | 484.1        | 1220               | 617.5        |
| 34                                  | 1252     | 1000.4       | 1302               | 868.7        |
| 35                                  | 1265     | 188.2        | 1315               | 644.2        |
| 36                                  | 3513     | 115.3        | 3448               | 162.9        |

**Table S13.** Harmonic vibrational frequencies ( $\omega$  in  $\text{cm}^{-1}$ ) and infrared intensities (IR intensity in  $\text{km mol}^{-1}$ ) for the product (**P'**) for the HCl-initiated ring-opening reaction fully optimized at the MP2/aTZ and the B3LYP/6-311+G(d,p) level of theory.

| Level of theory  | MP2/aTZ  |              | B3LYP/6-311+G(d,p) |              |
|------------------|----------|--------------|--------------------|--------------|
| Term/Vibration # | $\omega$ | IR intensity | $\omega$           | IR intensity |
| 1                | 17       | 0.2          | 22                 | 0.6          |
| 2                | 28       | 0.0          | 29                 | 0.0          |
| 3                | 54       | 0.3          | 35                 | 0.4          |
| 4                | 93       | 0.1          | 90                 | 2.3          |
| 5                | 97       | 0.2          | 92                 | 0.5          |
| 6                | 127      | 3.0          | 107                | 17.3         |
| 7                | 154      | 1.4          | 145                | 2.0          |
| 8                | 157      | 0.2          | 151                | 0.1          |
| 9                | 174      | 2.0          | 164                | 2.8          |
| 10               | 194      | 0.2          | 189                | 0.6          |
| 11               | 217      | 2.4          | 204                | 3.7          |
| 12               | 256      | 6.3          | 231                | 19.0         |
| 13               | 259      | 0.6          | 245                | 0.4          |
| 14               | 273      | 6.8          | 255                | 9.3          |
| 15               | 303      | 6.5          | 289                | 4.2          |
| 16               | 316      | 12.7         | 298                | 3.3          |
| 17               | 332      | 4.0          | 313                | 1.9          |
| 18               | 353      | 1.4          | 327                | 4.8          |
| 19               | 367      | 4.6          | 345                | 2.0          |
| 20               | 389      | 27.5         | 357                | 45.6         |
| 21               | 403      | 4.6          | 372                | 1.4          |
| 22               | 468      | 368.1        | 411                | 443.2        |
| 23               | 492      | 50.6         | 481                | 5.2          |
| 24               | 538      | 176.0        | 490                | 93.2         |
| 25               | 561      | 52.7         | 518                | 243.6        |
| 26               | 576      | 86.3         | 532                | 59.1         |
| 27               | 584      | 179.3        | 554                | 77.5         |
| 28               | 622      | 404.7        | 588                | 541.0        |
| 29               | 660      | 19.7         | 648                | 14.2         |
| 30               | 789      | 14.9         | 766                | 11.6         |
| 31               | 874      | 10.3         | 840                | 6.2          |
| 32               | 1007     | 175.7        | 994                | 184.7        |
| 33               | 1205     | 298.3        | 1211               | 579.1        |
| 34               | 1227     | 420.9        | 1257               | 279.6        |
| 35               | 1278     | 1043.8       | 1289               | 1206.5       |
| 36               | 3547     | 56.8         | 3566               | 57.9         |

**Table S14.** Harmonic vibrational frequencies ( $\omega$  in  $\text{cm}^{-1}$ ) and infrared intensities (IR intensity in  $\text{km mol}^{-1}$ ) for the reactant of the tautomerization reaction without the interferences of HCl (**Tauto\_R**) fully optimized at the MP2/aTZ and the B3LYP/6-311+G(d,p) level of theory.

| Level of theory  | MP2/aTZ  |              | B3LYP/6-311+G(d,p) |              |
|------------------|----------|--------------|--------------------|--------------|
| Term/Vibration # | $\omega$ | IR intensity | $\omega$           | IR intensity |
| 1                | 22       | 0.0          | 35                 | 0.0          |
| 2                | 30       | 0.1          | 39                 | 0.3          |
| 3                | 32       | 0.1          | 39                 | 0.0          |
| 4                | 124      | 5.0          | 120                | 2.6          |
| 5                | 157      | 11.4         | 153                | 3.0          |
| 6                | 164      | 20.0         | 165                | 24.6         |
| 7                | 179      | 1.0          | 171                | 1.2          |
| 8                | 190      | 5.7          | 186                | 7.7          |
| 9                | 205      | 2.8          | 199                | 2.3          |
| 10               | 221      | 6.5          | 214                | 7.4          |
| 11               | 252      | 5.4          | 244                | 5.7          |
| 12               | 286      | 26.7         | 282                | 37.2         |
| 13               | 329      | 7.1          | 320                | 3.1          |
| 14               | 338      | 4.3          | 325                | 4.3          |
| 15               | 342      | 1.1          | 331                | 1.6          |
| 16               | 346      | 11.1         | 333                | 3.4          |
| 17               | 363      | 8.4          | 358                | 12.5         |
| 18               | 400      | 12.5         | 377                | 9.5          |
| 19               | 414      | 20.5         | 404                | 36.6         |
| 20               | 542      | 302.2        | 507                | 338.0        |
| 21               | 551      | 227.6        | 526                | 251.0        |
| 22               | 583      | 6.9          | 546                | 1.8          |
| 23               | 609      | 452.8        | 588                | 477.4        |
| 24               | 644      | 16.9         | 640                | 36.7         |
| 25               | 769      | 61.1         | 743                | 61.7         |
| 26               | 869      | 51.9         | 837                | 61.0         |
| 27               | 880      | 16.2         | 847                | 24.4         |
| 28               | 966      | 154.3        | 929                | 186.7        |
| 29               | 1051     | 69.8         | 1015               | 60.5         |
| 30               | 1176     | 8.2          | 1130               | 7.4          |
| 31               | 1234     | 1105.8       | 1214               | 1241.4       |
| 32               | 1251     | 970.2        | 1234               | 1121.7       |
| 33               | 3799     | 173.2        | 3808               | 165.0        |

**Table S15.** Harmonic vibrational frequencies ( $\omega$  in  $\text{cm}^{-1}$ ) and infrared intensities (IR intensity in  $\text{km mol}^{-1}$ ) for the product of the tautomerization reaction without the interferences of HCl (**Tauto\_P**) fully optimized at the MP2/aTZ and the B3LYP/6-311+G(d,p) level of theory.

| Level of theory  | MP2/aTZ  |              | B3LYP/6-311+G(d,p) |              |
|------------------|----------|--------------|--------------------|--------------|
| Term/Vibration # | $\omega$ | IR intensity | $\omega$           | IR intensity |
| 1                | 27       | 0.0          | 37                 | 0.0          |
| 2                | 39       | 0.5          | 39                 | 0.5          |
| 3                | 53       | 0.1          | 45                 | 0.7          |
| 4                | 120      | 0.2          | 114                | 0.1          |
| 5                | 160      | 0.0          | 154                | 0.3          |
| 6                | 173      | 0.8          | 170                | 0.2          |
| 7                | 181      | 0.2          | 174                | 0.5          |
| 8                | 195      | 1.9          | 190                | 2.6          |
| 9                | 203      | 2.5          | 199                | 1.7          |
| 10               | 243      | 8.4          | 235                | 9.7          |
| 11               | 278      | 2.1          | 272                | 5.0          |
| 12               | 294      | 13.8         | 291                | 4.4          |
| 13               | 332      | 8.4          | 321                | 5.7          |
| 14               | 335      | 4.6          | 327                | 1.4          |
| 15               | 347      | 1.3          | 334                | 0.8          |
| 16               | 364      | 6.3          | 349                | 2.7          |
| 17               | 402      | 11.3         | 387                | 3.4          |
| 18               | 417      | 25.1         | 399                | 36.7         |
| 19               | 421      | 19.6         | 461                | 38.9         |
| 20               | 528      | 139.6        | 509                | 272.8        |
| 21               | 546      | 248.3        | 525                | 118.4        |
| 22               | 591      | 5.0          | 553                | 2.8          |
| 23               | 614      | 446.6        | 589                | 491.1        |
| 24               | 637      | 40.9         | 633                | 106.4        |
| 25               | 733      | 101.7        | 698                | 114.7        |
| 26               | 815      | 32.7         | 780                | 50.3         |
| 27               | 867      | 59.2         | 833                | 68.4         |
| 28               | 972      | 171.1        | 936                | 189.1        |
| 29               | 1216     | 164.6        | 1213               | 366.2        |
| 30               | 1225     | 141.8        | 1237               | 338.7        |
| 31               | 1268     | 905.0        | 1277               | 651.0        |
| 32               | 1340     | 590.0        | 1331               | 661.2        |
| 33               | 3570     | 117.1        | 3565               | 105.3        |

### Section 3. Bond lengths for chemical species appearing in the ring-opening reaction at the MP2/aTZ level of theory

**Table S16.** Bond lengths (in Angstrom, Å) of the reactants (R') for the HCl-initiated ring-opening reaction fully optimized at the MP2/aTZ level of theory.

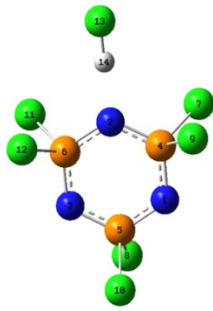

| Type    | Bond Length | Type     | Bond Length |
|---------|-------------|----------|-------------|
| P6-N2   | 1.60492     | P5-Cl10  | 2.00553     |
| N2-P4   | 1.60492     | Cl13-H14 | 1.29704     |
| P4-N1   | 1.59291     | H14-N2   | 1.88757     |
| N1-P5   | 1.59715     | Cl13-P6  | 4.21028     |
| P5-N3   | 1.59715     | Cl13-P4  | 4.21024     |
| N3-P6   | 1.59291     | H14-Cl11 | 3.68898     |
| P6-Cl11 | 2.00432     | H14-Cl12 | 3.43476     |
| P6-Cl12 | 2.00247     | H14-Cl17 | 3.68895     |
| P4-Cl17 | 2.00432     | H14-Cl19 | 3.43473     |
| P4-Cl19 | 2.00246     | H14-P6   | 3.01860     |
| P5-Cl8  | 2.00545     |          |             |

Color code: P = orange, N = blue, Cl = green, H = white

**Table S17.** Bond lengths (in Angstrom, Å) of the first transition state (TS1) for the HCl-initiated ring-opening reaction fully optimized at the MP2/aTZ level of theory.

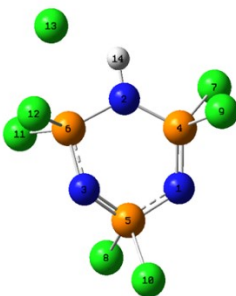

| Type    | Bond Length | Type     | Bond Length |
|---------|-------------|----------|-------------|
| P6-N2   | 1.68347     | P5-Cl10  | 1.99772     |
| N2-P4   | 1.65275     | Cl13-H14 | 1.95737     |
| P4-N1   | 1.57166     | H14-N2   | 1.04645     |
| N1-P5   | 1.61854     | Cl13-P6  | 2.68283     |
| P5-N3   | 1.57072     | Cl13-P4  | 4.27933     |
| N3-P6   | 1.62286     | H14-Cl11 | 3.40361     |
| P6-Cl11 | 2.00224     | H14-Cl12 | 3.40152     |
| P6-Cl12 | 1.99008     | H14-Cl17 | 3.03531     |
| P4-Cl17 | 1.98654     | H14-Cl19 | 3.41759     |
| P4-Cl19 | 2.00436     | H14-P6   | 2.25442     |
| P5-Cl8  | 2.01261     | H14-P4   | 2.40052     |

Color code: P = orange, N = blue, Cl = green, H = white

**Table S18.** Bond lengths (in Angstrom, Å) of the intermediate (**Int'**) for the HCl-initiated ring-opening reaction fully optimized at the MP2/aTZ level of theory.

| Type    | Bond Length | Type     | Bond Length |
|---------|-------------|----------|-------------|
| P6-N2   | 1.71645     | P5-Cl10  | 2.01748     |
| N2-P4   | 1.66359     | Cl13-H14 | 2.27058     |
| P4-N1   | 1.57293     | H14-N2   | 1.01644     |
| N1-P5   | 1.63370     | Cl13-P6  | 2.25387     |
| P5-N3   | 1.56105     | Cl13-P4  | 4.30166     |
| N3-P6   | 1.66211     | H14-Cl11 | 3.66972     |
| P6-Cl11 | 2.03388     | H14-Cl12 | 3.73229     |
| P6-Cl12 | 2.04885     | H14-Cl17 | 3.41412     |
| P4-Cl17 | 2.01159     | H14-Cl19 | 2.86459     |
| P4-Cl19 | 1.98868     | H14-P6   | 2.34223     |
| P5-Cl8  | 2.00428     | H14-P4   | 2.32156     |

Color code: P = orange, N = blue, Cl = green, H = white

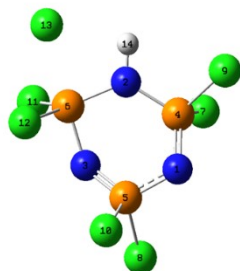

**Table S19.** Bond lengths (in Angstrom, Å) of the second transition state (**TS2**) for the HCl-initiated ring-opening reaction fully optimized at the MP2/aTZ level of theory.

| Type    | Bond Length | Type     | Bond Length |
|---------|-------------|----------|-------------|
| P6-N2   | 1.77729     | P5-Cl10  | 2.00101     |
| N2-P4   | 1.64552     | Cl13-H14 | 2.22487     |
| P4-N1   | 1.56780     | H14-N2   | 1.01675     |
| N1-P5   | 1.62028     | Cl13-P6  | 2.20629     |
| P5-N3   | 1.56329     | Cl13-P4  | 4.24016     |
| N3-P6   | 1.63749     | H14-Cl11 | 3.40552     |
| P6-Cl11 | 2.03755     | H14-Cl12 | 4.13039     |
| P6-Cl12 | 2.08601     | H14-Cl17 | 3.07201     |
| P4-Cl17 | 2.00800     | H14-Cl19 | 3.09573     |
| P4-Cl19 | 2.00396     | H14-P6   | 2.36822     |
| P5-Cl8  | 2.01592     | H14-P4   | 2.26789     |

Color code: P = orange, N = blue, Cl = green, H = white

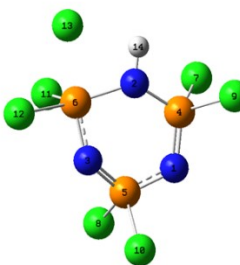

**Table S20.** Bond lengths (in Angstrom, Å) of the products (**P'**) for the HCl-initiated ring-opening reaction fully optimized at the MP2/aTZ level of theory.

|                                                                                   | Type    | Bond Length | Type     | Bond Length |
|-----------------------------------------------------------------------------------|---------|-------------|----------|-------------|
| 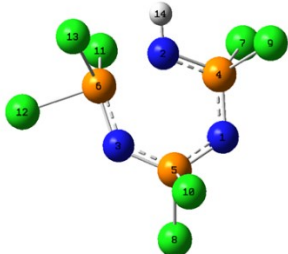 | P6-N2   | 1.88805     | P5-Cl10  | 2.01753     |
|                                                                                   | N2-P4   | 1.62021     | Cl13-H14 | 2.54694     |
|                                                                                   | P4-N1   | 1.58015     | H14-N2   | 1.01557     |
|                                                                                   | N1-P5   | 1.60972     | Cl13-P6  | 2.06180     |
|                                                                                   | P5-N3   | 1.58080     | Cl13-P4  | 4.24511     |
|                                                                                   | N3-P6   | 1.60390     | H14-Cl11 | 2.99808     |
|                                                                                   | P6-Cl11 | 2.06451     | H14-Cl12 | 4.44028     |
|                                                                                   | P6-Cl12 | 2.12193     | H14-Cl17 | 3.29396     |
|                                                                                   | P4-Cl17 | 2.00986     | H14-Cl19 | 3.01365     |
|                                                                                   | P4-Cl19 | 2.00937     | H14-P6   | 2.47413     |
|                                                                                   | P5-Cl8  | 1.99476     | H14-P4   | 2.25161     |

Color code: P = orange, N = blue, Cl = green, H = white

#### Section 4. The energies and shapes of the frontier molecular orbitals of selected structures

**Table S21.** The energy (in Hartree) of selected frontier molecular orbitals of the reactant (**R**) and transition state (**TS1'**) in the ring-opening reaction at the MP2/aTZ level of theory

| Selected Frontier Molecular Orbital | R'     | TS1'   |
|-------------------------------------|--------|--------|
| LUMO                                | 0.037  | 0.028  |
| HOMO                                | -0.442 | -0.378 |
| HOMO-1                              | -0.443 | -0.389 |
| HOMO-2                              | -0.451 | -0.439 |
| HOMO-3                              | -0.451 | -0.463 |
| HOMO-4                              | -0.464 | -0.465 |
| HOMO-5                              | -0.473 | -0.488 |
| HOMO-6                              | -0.474 | -0.493 |

**Figure S1.** The shape of the selected frontier molecular orbitals of the reactant (**R**) and transition state (**TS1'**) in the ring-opening reaction at the MP2/aTZ level of theory

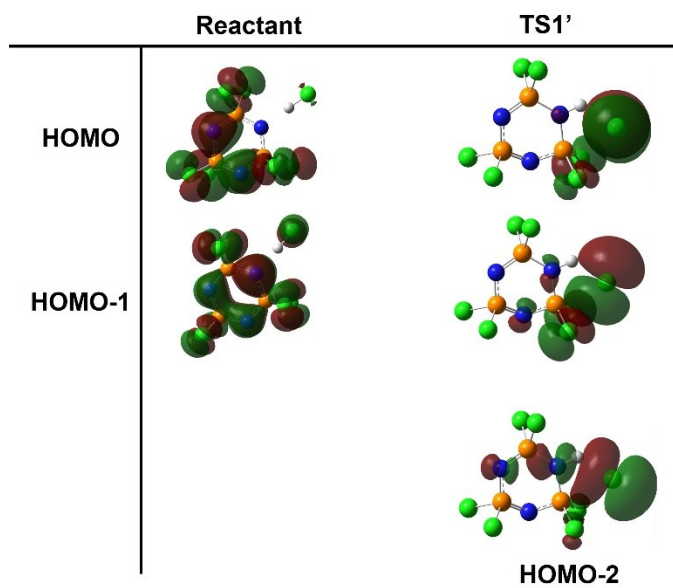

## Section 5. Cartesian Coordinates

### Section 5.1 Electronic structures fully optimized at the MP2/aTZ level of theory

#### Section 5.1.1. Cartesian Coordinates for the pivotal structure of the hydrolysis reaction followed by HCl-catalyzed tautomerization calculated at the MP2/aTZ level of theory

**Table S22.** Cartesian coordinates (in Angstrom, Å) of the reactants (**R**) for the hydrolysis reaction fully optimized at the MP2/aTZ level of theory.

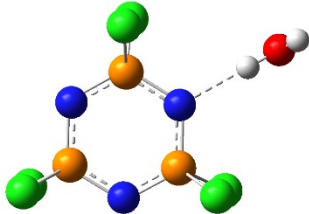

|    |             |             |             |
|----|-------------|-------------|-------------|
| P  | 0.03953300  | 0.54806100  | 1.39141500  |
| P  | 0.03953300  | 0.54806100  | -1.39141500 |
| P  | 0.04254100  | -1.84871600 | 0.00000000  |
| N  | 0.03407400  | 1.34372000  | 0.00000000  |
| N  | 0.03953300  | -1.04604100 | 1.38036000  |
| N  | 0.03953300  | -1.04604100 | -1.38036000 |
| Cl | -1.50487000 | 1.19582600  | 2.48690100  |
| Cl | -1.51002300 | -3.11907400 | 0.00000000  |
| Cl | 1.61029300  | 1.18439700  | -2.46859500 |
| Cl | -1.50487000 | 1.19582600  | -2.48690100 |
| Cl | 1.60592000  | -3.10726300 | 0.00000000  |
| Cl | 1.61029300  | 1.18439700  | 2.46859500  |
| H  | -0.13733700 | 4.76306700  | 0.00000000  |
| O  | -0.89755900 | 4.17481500  | 0.00000000  |
| H  | -0.51289200 | 3.28598300  | 0.00000000  |

Color code: P = orange, N = blue, Cl = green, O = red, H = white

**Table S23.** Cartesian coordinates (in Angstrom, Å) of the transition state (**TS**) for the hydrolysis reaction fully optimized at the MP2/aTZ level of theory.

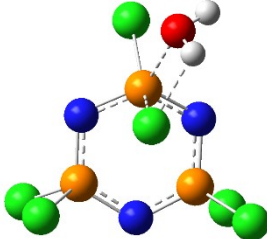

|    |             |             |             |
|----|-------------|-------------|-------------|
| P  | 0.52690000  | 1.42957100  | -0.17816800 |
| P  | 1.00705200  | -1.23671200 | -0.12696700 |
| P  | -1.60357200 | -0.25186100 | -0.07421700 |
| N  | 1.58073200  | 0.23927600  | -0.40498600 |
| N  | -1.05299100 | 1.22640700  | -0.40239400 |
| N  | -0.56309500 | -1.45878600 | 0.04577700  |
| Cl | 0.82476700  | 2.67512100  | -1.80001000 |
| Cl | -2.91245600 | -0.66470400 | -1.53937400 |
| Cl | 1.93231600  | -2.05090800 | 1.46038500  |
| Cl | 1.67647400  | -2.40154700 | -1.61975600 |
| Cl | -2.79356400 | -0.27564500 | 1.54053200  |
| Cl | 0.30829200  | 1.16571500  | 2.19172100  |
| H  | 1.79624400  | 2.35989500  | 1.56780900  |
| O  | 1.67306700  | 2.75589800  | 0.66589000  |
| H  | 2.50187900  | 2.81312200  | 0.15711800  |

Color code: P = orange, N = blue, Cl = green, O = red, H = white

**Table S24.** Cartesian coordinates (in Angstrom, Å) of the products (**P\_1HB**) for the hydrolysis reaction fully optimized at the MP2/aTZ level of theory.

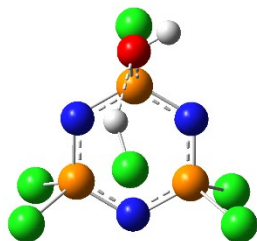

|    |             |             |             |
|----|-------------|-------------|-------------|
| P  | 0.00200100  | -0.98765000 | 1.39741600  |
| P  | -1.42031700 | 0.21100900  | -0.64404400 |
| P  | 1.34060700  | 0.05131900  | -0.76917200 |
| N  | -1.39044300 | -0.48907700 | 0.79098200  |
| N  | 1.37319600  | -0.57046800 | 0.70250100  |
| N  | -0.04737800 | 0.53993100  | -1.38934100 |
| Cl | -0.08898800 | -2.99836300 | 1.57691300  |
| Cl | 2.17880600  | -1.26194000 | -2.04923600 |
| Cl | -2.49799200 | 1.89412300  | -0.50919700 |
| Cl | -2.56004500 | -0.89999600 | -1.87936500 |
| Cl | 2.64141800  | 1.56776200  | -0.83224000 |
| Cl | 0.35508600  | 2.73096400  | 1.94191400  |
| H  | 0.68355600  | 1.63986100  | 2.52506200  |
| O  | 0.14151900  | -0.50448200 | 2.91734700  |
| H  | -0.67852900 | -0.64024200 | 3.41476600  |

Color code: P = orange, N = blue, Cl = green, O = red, H = white

**Table S25.** Cartesian coordinates (in Angstrom, Å) of the product with two hydrogen bonds (**P\_2HB**) for the hydrolysis reaction fully optimized at the MP2/aTZ level of theory.

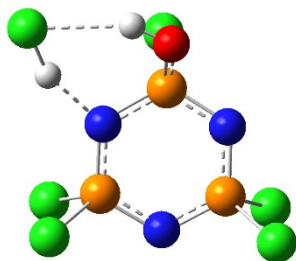

|    |             |             |             |
|----|-------------|-------------|-------------|
| P  | 0.58834700  | 1.36484900  | -0.16510200 |
| P  | -1.91794700 | 0.21854900  | -0.26560500 |
| P  | 0.29633900  | -1.37830400 | 0.22124200  |
| N  | -0.96452600 | 1.47346500  | -0.49256900 |
| N  | 1.24197500  | -0.10936600 | -0.02918600 |
| N  | -1.27918700 | -1.21062400 | 0.06678300  |
| Cl | 0.97937300  | 2.35114600  | 1.55508100  |
| Cl | 0.68242100  | -2.14572600 | 2.03956800  |
| Cl | -3.09570000 | 0.03093600  | -1.87532200 |
| Cl | -3.25151400 | 0.64590700  | 1.17639800  |
| Cl | 0.93540000  | -2.84661100 | -0.98416600 |
| Cl | 4.11629000  | 0.57365300  | -0.84559900 |
| H  | 3.00401600  | 0.02180800  | -0.41850400 |
| O  | 1.36906400  | 2.18461700  | -1.26480200 |
| H  | 2.32795100  | 1.99234300  | -1.25763800 |

Color code: P = orange, N = blue, Cl = green, O = red, H = white

**Table S26.** Cartesian coordinates (in Angstrom, Å) of the synchronous proton transfer transition state (SPT\_TS) after the hydrolysis reaction fully optimized at the MP2/aTZ level of theory.

|                                                                                   |    |             |             |             |
|-----------------------------------------------------------------------------------|----|-------------|-------------|-------------|
| 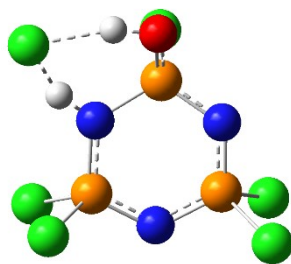 | P  | -0.49031500 | -1.49845900 | -0.18118600 |
|                                                                                   | P  | 1.86917800  | -0.05640400 | -0.30855500 |
|                                                                                   | P  | -0.45954900 | 1.33337300  | 0.35752800  |
|                                                                                   | N  | 1.00968000  | -1.34107200 | -0.67490200 |
|                                                                                   | N  | -1.26301900 | -0.05850900 | 0.11394600  |
|                                                                                   | N  | 1.11423600  | 1.24431100  | 0.25083800  |
|                                                                                   | Cl | -0.51346600 | -2.53039200 | 1.54285500  |
|                                                                                   | Cl | -0.95506300 | 2.06663400  | 2.14552800  |
|                                                                                   | Cl | 2.93813900  | 0.45374700  | -1.91712200 |
|                                                                                   | Cl | 3.28905100  | -0.52300000 | 1.02733000  |
|                                                                                   | Cl | -1.24379400 | 2.66855400  | -0.89763200 |
|                                                                                   | Cl | -3.75729400 | -0.68437200 | -1.01452100 |
|                                                                                   | H  | -2.36434400 | -0.11842200 | -0.25238200 |
|                                                                                   | O  | -1.37579400 | -2.28401000 | -1.17821200 |
|                                                                                   | H  | -2.32402300 | -1.87015800 | -1.23734700 |

Color code: P = orange, N = blue, Cl = green, O = red, H = white

**Table S27.** Cartesian coordinates (in Angstrom, Å) of the final product (P fully optimized at the MP2/aTZ level of theory) after the HCl-catalyzed tautomerization.

|                                                                                     |    |             |             |             |
|-------------------------------------------------------------------------------------|----|-------------|-------------|-------------|
| 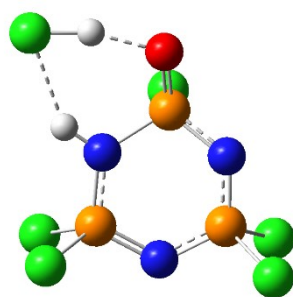 | P  | -0.63430500 | -1.47049700 | -0.24536600 |
|                                                                                     | P  | 1.86961000  | -0.26177000 | -0.34296500 |
|                                                                                     | P  | -0.27624000 | 1.42537100  | 0.25264000  |
|                                                                                     | N  | 0.87003200  | -1.39838200 | -0.79030000 |
|                                                                                     | N  | -1.21443700 | 0.14717200  | -0.14334200 |
|                                                                                     | N  | 1.26391500  | 1.13111700  | 0.20047400  |
|                                                                                     | Cl | -0.54686300 | -2.02845600 | 1.71492600  |
|                                                                                     | Cl | -0.78661600 | 2.10630400  | 2.06205500  |
|                                                                                     | Cl | 3.09071600  | 0.14335200  | -1.87277600 |
|                                                                                     | Cl | 3.14632000  | -0.89572400 | 1.07149900  |
|                                                                                     | Cl | -0.83592400 | 2.93055400  | -0.93614500 |
|                                                                                     | Cl | -4.20270800 | -0.78170500 | -0.90801500 |
|                                                                                     | H  | -2.22918500 | 0.25142200  | -0.23590700 |
|                                                                                     | O  | -1.63991300 | -2.28290300 | -0.97658100 |
|                                                                                     | H  | -3.17779900 | -1.60762600 | -1.02016700 |

Color code: P = orange, N = blue, Cl = green, O = red, H = white

**Section 5.1.2. Cartesian coordinates for chemical species appearing in tautomerization reaction in the absence of HCl interference calculated at the MP2/aTZ level of theory**

**Table S28.** Cartesian coordinates (in Angstrom, Å) of the reactants in the tautomerization reaction occurring in the absence of HCl interferences (**Tauto\_R**) fully optimized at the MP2/aTZ level of theory.

|                                                                                   |    |             |             |             |
|-----------------------------------------------------------------------------------|----|-------------|-------------|-------------|
| 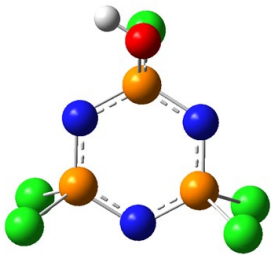 | P  | 0.02573400  | 1.65260800  | -0.63291400 |
|                                                                                   | P  | -1.40252500 | -0.60161700 | 0.03796800  |
|                                                                                   | P  | 1.36590700  | -0.66577700 | 0.03621800  |
|                                                                                   | N  | -1.36881600 | 0.88887500  | -0.52604900 |
|                                                                                   | N  | 1.39227800  | 0.82105400  | -0.53939200 |
|                                                                                   | N  | -0.03469400 | -1.38392600 | 0.30589000  |
|                                                                                   | Cl | 0.09650700  | 3.10542900  | 0.77855100  |
|                                                                                   | Cl | 2.44342200  | -0.74510800 | 1.73521100  |
|                                                                                   | Cl | -2.54182800 | -1.70506600 | -1.19144300 |
|                                                                                   | Cl | -2.48142400 | -0.64095700 | 1.73568700  |
|                                                                                   | Cl | 2.46007300  | -1.82376900 | -1.18611500 |
|                                                                                   | O  | -0.02260900 | 2.47327500  | -1.99298600 |
|                                                                                   | H  | 0.81803200  | 2.91457600  | -2.18048200 |

Color code: P = orange, N = blue, Cl = green, O = red, H = white

**Table S29.** Cartesian coordinates (in Angstrom, Å) of the tautomerization transition state without HCl interferences (**Tauto\_TS**) fully optimized at the MP2/aTZ level of theory.

|                                                                                     |    |             |             |             |
|-------------------------------------------------------------------------------------|----|-------------|-------------|-------------|
| 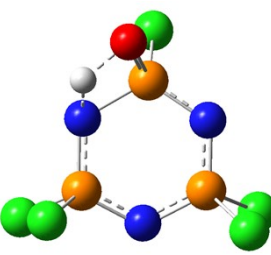 | P  | -0.23069100 | 1.71131600  | -0.65901600 |
|                                                                                     | P  | -1.31848200 | -0.74340700 | 0.04551900  |
|                                                                                     | P  | 1.44341100  | -0.46303300 | 0.20534400  |
|                                                                                     | N  | -1.45670100 | 0.69159000  | -0.61860500 |
|                                                                                     | N  | 1.29353300  | 1.06356700  | -0.31008000 |
|                                                                                     | N  | 0.10799300  | -1.21983100 | 0.60868900  |
|                                                                                     | Cl | -0.64256800 | 3.19746800  | 0.62473700  |
|                                                                                     | Cl | 2.67651200  | -0.53182200 | 1.77669200  |
|                                                                                     | Cl | -2.00077200 | -2.11212100 | -1.25554900 |
|                                                                                     | Cl | -2.61459700 | -0.92667300 | 1.56367500  |
|                                                                                     | Cl | 2.48351200  | -1.46232100 | -1.19505300 |
|                                                                                     | O  | 0.28758900  | 2.28192900  | -1.98818000 |
|                                                                                     | H  | 1.33647700  | 1.62711800  | -1.47882900 |

Color code: P = orange, N = blue, Cl = green, O = red, H = white

**Table S30.** Cartesian coordinates (in Angstrom, Å) of the product of the tautomerization reaction without HCl interferences (**Tauto\_P**) fully optimized at the MP2/aTZ level of theory.

|                           |    |             |             |             |
|---------------------------|----|-------------|-------------|-------------|
| fully optimized structure | P  | -0.19787300 | 1.69858500  | -0.97782200 |
|                           | P  | -1.37586700 | -0.63454100 | 0.00388200  |
|                           | P  | 1.41320300  | -0.56829100 | 0.08330700  |
|                           | N  | -1.39325600 | 0.62352300  | -0.94251400 |
|                           | N  | 1.26514400  | 0.76889800  | -0.84735600 |
|                           | N  | 0.04805000  | -1.20613700 | 0.51140500  |
|                           | Cl | -0.22318000 | 2.65630200  | 0.83756700  |
|                           | Cl | 2.53106700  | -0.16080100 | 1.69484100  |
|                           | Cl | -2.34521700 | -2.13001800 | -0.90496000 |
|                           | Cl | -2.47548900 | -0.36230300 | 1.66447500  |
|                           | Cl | 2.59119400  | -1.83525700 | -0.92279100 |
|                           | O  | -0.05746900 | 2.64793700  | -2.09416600 |
|                           | H  | 2.09587500  | 1.22152600  | -1.21316800 |

Color code: P = orange, N = blue, Cl = green, O = red, H = white

### Section 5.1.3. Cartesian Coordinates for chemical species appearing in the ring-opening reaction at the MP2/aTZ level of theory

**Table S31.** Cartesian coordinates (in Angstrom, Å) of the reactants (**R'**) for the HCl-initiated ring-opening reaction fully optimized at the MP2/aTZ level of theory.

|                                                                                     |    |             |             |             |
|-------------------------------------------------------------------------------------|----|-------------|-------------|-------------|
| 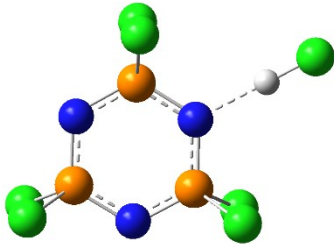 | N  | 1.25220000  | -1.38016100 | -0.03058100 |
|                                                                                     | N  | -1.13106100 | 0.00001600  | 0.10000700  |
|                                                                                     | N  | 1.25222700  | 1.38014500  | -0.03059300 |
|                                                                                     | P  | -0.33761200 | -1.39467100 | 0.06757700  |
|                                                                                     | P  | 2.05427900  | -0.00001600 | -0.08299700 |
|                                                                                     | P  | -0.33758400 | 1.39468600  | 0.06757100  |
|                                                                                     | Cl | -0.88438200 | -2.46223700 | 1.67339200  |
|                                                                                     | Cl | 3.41435900  | -0.00002300 | 1.39077500  |
|                                                                                     | Cl | -1.08198300 | -2.48953800 | -1.43476900 |
|                                                                                     | Cl | 3.21373400  | -0.00003500 | -1.71939400 |
|                                                                                     | Cl | -0.88432600 | 2.46226800  | 1.67338600  |
|                                                                                     | Cl | -1.08193900 | 2.48956600  | -1.43477400 |
|                                                                                     | Cl | -4.30066200 | -0.00000100 | -0.20680800 |
|                                                                                     | H  | -3.01141900 | 0.00001600  | -0.06481400 |

Color code: P = orange, N = blue, Cl = green, H = white

**Table S32.** Cartesian coordinates (in Angstrom, Å) of the transition state (**TS1'**) for the HCl-initiated ring-opening reaction fully optimized at the MP2/aTZ level of theory.

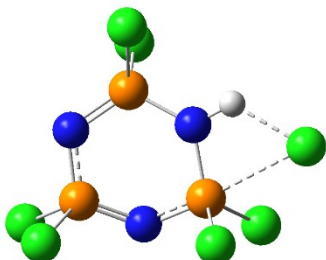

|    |             |             |             |
|----|-------------|-------------|-------------|
| N  | 1.75305600  | 0.78200700  | -0.35623200 |
| N  | -0.97110400 | 0.83718600  | -0.05749600 |
| N  | 0.30871900  | -1.32447300 | 0.60435600  |
| P  | 0.46509900  | 1.65231900  | -0.12423200 |
| P  | 1.66390800  | -0.79048200 | 0.01658200  |
| P  | -1.18253500 | -0.80892400 | 0.22482100  |
| Cl | 0.22602000  | 2.99127800  | -1.57211900 |
| Cl | 2.26818100  | -1.78642200 | -1.62462500 |
| Cl | 0.59277200  | 2.79210000  | 1.51956600  |
| Cl | 3.11630500  | -1.20129400 | 1.32527300  |
| Cl | -1.65207400 | -1.93585700 | -1.36216100 |
| Cl | -2.14541900 | -1.36808400 | 1.87424500  |
| Cl | -3.57814600 | 0.26534900  | -0.32704000 |
| H  | -1.90164800 | 1.27307300  | -0.25534900 |

Color code: P = orange, N = blue, Cl = green, H = white

**Table S33.** Cartesian coordinates (in Angstrom, Å) of the intermediate (**Int'**) for the HCl-initiated ring-opening reaction fully optimized at the MP2/aTZ level of theory.

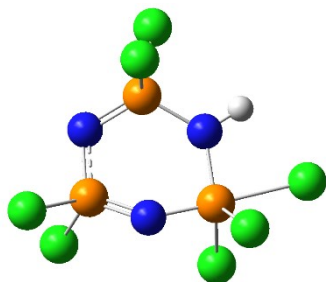

|    |             |             |             |
|----|-------------|-------------|-------------|
| N  | -1.88100600 | 0.33218400  | -0.58585900 |
| N  | 0.74051200  | 1.14186800  | -0.29647000 |
| N  | 0.06924500  | -1.08315300 | 0.66572300  |
| P  | -0.88336100 | 1.49956800  | -0.24523100 |
| P  | -1.34546500 | -1.09329200 | 0.00589800  |
| P  | 1.47089100  | -0.33947300 | 0.17082300  |
| Cl | -1.24803200 | 2.38299200  | 1.52481700  |
| Cl | -2.66751200 | -1.73153400 | 1.37044600  |
| Cl | -1.07734900 | 2.99100700  | -1.54632300 |
| Cl | -1.62118300 | -2.41551700 | -1.49274700 |
| Cl | 2.32641900  | -0.54108800 | 2.00496800  |
| Cl | 1.97037300  | -1.75848100 | -1.22012300 |
| Cl | 3.34588600  | 0.74253200  | -0.45656300 |
| H  | 1.38151100  | 1.87318000  | -0.59220600 |

Color code: P = orange, N = blue, Cl = green, H = white

**Table S34.** Cartesian coordinates (in Angstrom, Å) of the transition state (TS2') for the HCl-initiated ring-opening reaction fully optimized at the MP2/aTZ level of theory.

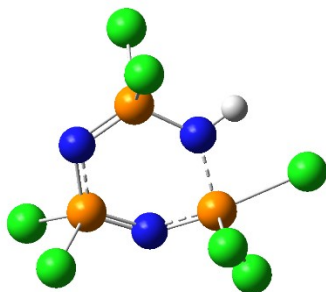

|    |             |             |             |
|----|-------------|-------------|-------------|
| N  | 1.96606400  | 0.10796600  | 0.05777200  |
| N  | -0.36429000 | -1.28199200 | -0.31846800 |
| N  | -0.47970200 | 1.23780500  | -0.47028800 |
| P  | 1.26195900  | -1.28722600 | -0.06745200 |
| P  | 1.02368200  | 1.41860400  | -0.08167900 |
| P  | -1.54618400 | 0.03546900  | -0.15664200 |
| Cl | 1.61777600  | -2.42574600 | 1.54785600  |
| Cl | 1.24689800  | 2.45133000  | 1.63517700  |
| Cl | 2.05745100  | -2.40676900 | -1.52678900 |
| Cl | 1.89655200  | 2.62666300  | -1.41687400 |
| Cl | -1.89216000 | 0.16493100  | 1.84714100  |
| Cl | -3.04990700 | 1.18850800  | -1.02885100 |
| Cl | -2.94434900 | -1.64281900 | -0.46682100 |
| H  | -0.79480100 | -2.20283000 | -0.34079400 |

Color code: P = orange, N = blue, Cl = green, H = white

**Table S35.** Cartesian coordinates (in Angstrom, Å) of the products (P') for the HCl-initiated ring-opening reaction fully optimized at the MP2/aTZ level of theory.

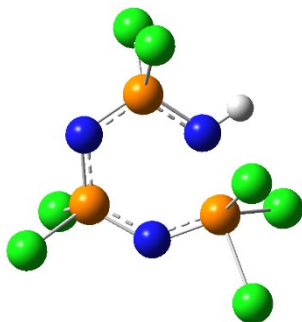

|    |             |             |             |
|----|-------------|-------------|-------------|
| N  | -1.74714600 | 0.50636600  | -0.54606000 |
| N  | -0.02819500 | -1.18104300 | 0.61868900  |
| N  | 0.89068000  | 1.15690500  | -0.03619800 |
| P  | -1.49428700 | -0.96811100 | -0.03729700 |
| P  | -0.62380800 | 1.59273000  | -0.15991000 |
| P  | 1.56297700  | -0.28974600 | 0.13032100  |
| Cl | -1.90870100 | -2.23911200 | -1.53808300 |
| Cl | -0.75374600 | 3.02653500  | -1.54063600 |
| Cl | -2.81862300 | -1.55945000 | 1.35339900  |
| Cl | -1.17561000 | 2.55470900  | 1.52548200  |
| Cl | 1.74096900  | -1.61630200 | -1.44154600 |
| Cl | 3.49118600  | 0.48520100  | -0.29870300 |
| Cl | 2.27085600  | -1.02270700 | 1.92272500  |
| H  | 0.13179600  | -2.08954500 | 1.04342700  |

Color code: P = orange, N = blue, Cl = green, H = white

**Section 5.2 Coordinates for the electronic structures fully optimized at the B3LYP/6-311+G(d,p) level of theory**

**Section 5.2.1. Cartesian Coordinates for the pivotal structure in the hydrolysis reaction followed by HCl-catalyzed tautomerization at the B3LYP/6-311+G(d,p) level of theory**

**Table S36.** Cartesian coordinates (in Angstrom, Å) of the reactants (**R**) for the hydrolysis reaction fully optimized at the B3LYP/6-311+G(d,p) level of theory.

|  |    |             |             |             |
|--|----|-------------|-------------|-------------|
|  | P  | 0.60567900  | -1.37539400 | -0.01924300 |
|  | P  | 0.50907800  | 1.44033800  | -0.00051200 |
|  | P  | -1.86926600 | -0.05100500 | 0.01820000  |
|  | N  | 1.32842000  | 0.05898600  | -0.01653300 |
|  | N  | -0.98730700 | -1.38092900 | 0.00206400  |
|  | N  | -1.08049600 | 1.33626600  | 0.02184400  |
|  | Cl | 1.31125400  | -2.47316000 | 1.53704100  |
|  | Cl | -3.13475600 | -0.10587700 | 1.61177600  |
|  | Cl | 1.08873400  | 2.56181600  | -1.60070300 |
|  | Cl | 1.13955300  | 2.56406400  | 1.56931200  |
|  | Cl | -3.16018400 | -0.08414400 | -1.55702500 |
|  | Cl | 1.26160600  | -2.43387500 | -1.63276800 |
|  | H  | 4.69640200  | 0.17970000  | -0.62710500 |
|  | O  | 4.34265800  | 0.16077700  | 0.26681900  |
|  | H  | 3.38131300  | 0.12797100  | 0.15541800  |

Color code: P = orange, N = blue, Cl = green, O = red, H = white

**Table S37.** Cartesian coordinates (in Angstrom, Å) of the transition state (**TS**) for the hydrolysis reaction fully optimized at the B3LYP/6-311+G(d,p) level of theory.

|  |    |             |             |             |
|--|----|-------------|-------------|-------------|
|  | P  | -1.14271900 | -0.89419700 | 0.23787600  |
|  | P  | 1.66803400  | -0.68729500 | -0.19931900 |
|  | P  | 0.16437800  | 1.62487500  | 0.10701500  |
|  | N  | 0.30707200  | -1.52573700 | -0.11468300 |
|  | N  | -1.05761600 | 0.67986200  | 0.52053700  |
|  | N  | 1.55659500  | 0.90215900  | -0.20846600 |
|  | Cl | -2.01903200 | -1.70991100 | 1.85980100  |
|  | Cl | 0.41229100  | 2.96344000  | 1.61282200  |
|  | Cl | 2.66582100  | -1.28468000 | -1.87228200 |
|  | Cl | 2.93366700  | -1.28988200 | 1.28762100  |
|  | Cl | -0.32474200 | 2.81130200  | -1.47343600 |
|  | Cl | -3.50062600 | -0.21300600 | -1.03004700 |
|  | H  | -2.68693400 | -1.80302600 | -1.30832600 |
|  | O  | -1.86900800 | -2.29865700 | -0.90527100 |
|  | H  | -1.19418300 | -2.56594900 | -1.55094300 |

Color code: P = orange, N = blue, Cl = green, O = red, H = white

**Table S38.** Cartesian coordinates (in Angstrom, Å) of the products with one hydrogen bond (**P\_1HB**) for the hydrolysis reaction fully optimized at the B3LYP/6-311+G(d,p) level of theory.

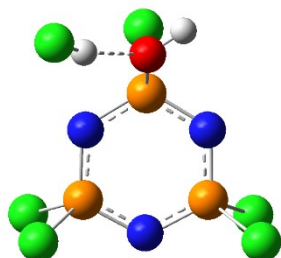

|    |             |             |             |
|----|-------------|-------------|-------------|
| P  | -0.68409800 | -1.11683300 | 0.64573200  |
| P  | 1.75437200  | -0.53717700 | -0.59282300 |
| P  | 0.05794800  | 1.54109400  | 0.23739400  |
| N  | 0.65460500  | -1.58218400 | -0.09520900 |
| N  | -0.99960800 | 0.44135600  | 0.70766800  |
| N  | 1.42514800  | 1.01110900  | -0.39531200 |
| Cl | -0.69669800 | -1.92017400 | 2.52971000  |
| Cl | 0.49504900  | 2.78052000  | 1.79562200  |
| Cl | 2.15980500  | -0.90096600 | -2.55812400 |
| Cl | 3.54790200  | -0.94682700 | 0.28863500  |
| Cl | -0.85241200 | 2.80436000  | -1.07295000 |
| Cl | -4.83788800 | -0.59964400 | -1.26041000 |
| H  | -3.69616700 | -0.87820700 | -0.71981200 |
| O  | -1.96988400 | -1.80638900 | -0.03410200 |
| H  | -1.89700400 | -2.76245500 | -0.16418900 |

Color code: P = orange, N = blue, Cl = green, O = red, H = white

**Table S39.** Cartesian coordinates (in Angstrom, Å) of the hydrogen bond configuration change transition state (**TS\_HB**) for the hydrolysis reaction fully optimized at the B3LYP/6-311+G(d,p) level of theory.

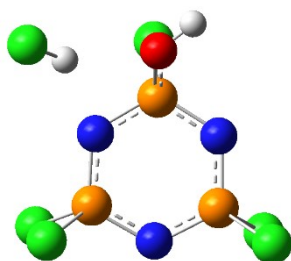

|    |             |             |             |
|----|-------------|-------------|-------------|
| P  | -0.48282900 | -1.41171600 | 0.26995400  |
| P  | 1.88693300  | -0.16209700 | -0.52825000 |
| P  | -0.26642300 | 1.36776100  | 0.42517300  |
| N  | 0.98339300  | -1.46762100 | -0.36479400 |
| N  | -1.12562500 | 0.02461000  | 0.52951300  |
| N  | 1.23585500  | 1.22946800  | -0.09796800 |
| Cl | -0.47989800 | -2.52226000 | 1.99392300  |
| Cl | -0.24364700 | 2.31730700  | 2.22964800  |
| Cl | 2.52587000  | -0.04610800 | -2.46202000 |
| Cl | 3.64371800  | -0.40375700 | 0.47963100  |
| Cl | -1.27886800 | 2.69018100  | -0.74245700 |
| Cl | -4.61211900 | -0.51283700 | -1.26893900 |
| H  | -3.42844500 | -0.77240500 | -0.82482200 |
| O  | -1.54967000 | -2.17922100 | -0.64644300 |
| H  | -1.33072400 | -3.09119900 | -0.88042600 |

Color code: P = orange, N = blue, Cl = green, O = red, H = white

**Table S40.** Cartesian coordinates (in Angstrom, Å) of the products with two hydrogen bonds (**P\_2HB**) for the hydrolysis reaction fully optimized at the B3LYP/6-311+G(d,p) level of theory.

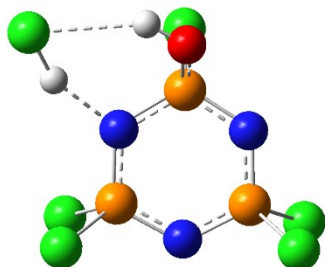

|    |             |             |             |
|----|-------------|-------------|-------------|
| P  | -0.56128700 | -1.41307400 | -0.13318300 |
| P  | 1.95182700  | -0.19236400 | -0.25616100 |
| P  | -0.32225400 | 1.37065300  | 0.26562900  |
| N  | 1.00317600  | -1.45998000 | -0.40978500 |
| N  | -1.22040800 | 0.06000800  | 0.03576300  |
| N  | 1.25094300  | 1.19850000  | 0.10640200  |
| Cl | -0.99408400 | -2.49657500 | 1.54981100  |
| Cl | -0.72099300 | 2.18166400  | 2.09565800  |
| Cl | 3.04462700  | 0.02884500  | -1.96000700 |
| Cl | 3.39500900  | -0.56837900 | 1.13220800  |
| Cl | -0.99997100 | 2.82136800  | -0.99293900 |
| Cl | -4.16776700 | -0.52032900 | -0.89304300 |
| H  | -3.05399400 | -0.00681300 | -0.40484400 |
| O  | -1.30064300 | -2.19743800 | -1.29764000 |
| H  | -2.26708400 | -2.07372300 | -1.32365700 |

Color code: P = orange, N = blue, Cl = green, O = red, H = white

**Table S41.** Cartesian coordinates (in Angstrom, Å) of the synchronous proton transfer transition state (**SPT\_TS**) after the hydrolysis reaction fully optimized at the B3LYP/6-311+G(d,p) level of theory.

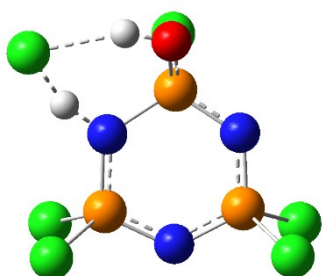

|    |             |             |             |
|----|-------------|-------------|-------------|
| P  | -0.52434800 | -1.50407800 | -0.14670700 |
| P  | 1.90950700  | -0.10736600 | -0.28214400 |
| P  | -0.43125000 | 1.35395600  | 0.33061800  |
| N  | 1.01781800  | -1.40398100 | -0.49273900 |
| N  | -1.25895000 | -0.01986500 | 0.03455800  |
| N  | 1.13634500  | 1.21357900  | 0.19004800  |
| Cl | -0.76206000 | -2.53371600 | 1.59409300  |
| Cl | -0.89180800 | 2.06258300  | 2.17562900  |
| Cl | 2.93442300  | 0.28012100  | -1.99183900 |
| Cl | 3.39680900  | -0.47383400 | 1.05334700  |
| Cl | -1.18717700 | 2.77171000  | -0.89877800 |
| Cl | -3.78931800 | -0.60198400 | -1.06074600 |
| H  | -2.42825300 | -0.08040700 | -0.35160800 |
| O  | -1.34610600 | -2.27967100 | -1.22417100 |
| H  | -2.29277900 | -1.93101100 | -1.32359300 |

Color code: P = orange, N = blue, Cl = green, O = red, H = white

**Table S42.** Cartesian coordinates (in Angstrom, Å) of the final product (**P**) after the HCl-catalyzed tautomerization fully optimized at the B3LYP/6-311+G(d,p) level of theory.

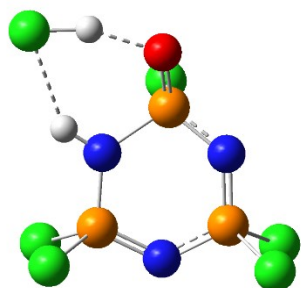

|    |             |             |             |
|----|-------------|-------------|-------------|
| P  | -0.69346600 | -1.49062400 | -0.11612100 |
| P  | 1.88770600  | -0.32426400 | -0.37399400 |
| P  | -0.19873100 | 1.46269900  | 0.29588400  |
| N  | 0.82271600  | -1.45368400 | -0.62388100 |
| N  | -1.19613500 | 0.17943100  | 0.03417500  |
| N  | 1.31387300  | 1.08754800  | 0.15550800  |
| Cl | -0.67104100 | -2.13865400 | 1.84732400  |
| Cl | -0.56446900 | 2.28297300  | 2.11698800  |
| Cl | 2.94315300  | -0.00218100 | -2.07997600 |
| Cl | 3.33701900  | -0.89250000 | 0.93927200  |
| Cl | -0.79649000 | 2.93402900  | -0.97183600 |
| Cl | -4.37080800 | -0.68289600 | -1.01925600 |
| H  | -2.20429900 | 0.32765800  | -0.03545600 |
| O  | -1.73226900 | -2.21394700 | -0.88529400 |
| H  | -3.36857300 | -1.53943900 | -1.08213200 |

Color code: P = orange, N = blue, Cl = green, O = red, H = white

### Section 5.2.2. Cartesian Coordinates for chemical species appearing in the tautomerization reaction without the interference from HCl at the B3LYP/6-311+G(d,p) level of theory

**Table S43.** Cartesian coordinates (in Angstrom, Å) of the reactants of the tautomerization reaction without the interferences of HCl (**Tauto\_R**) fully optimized at the B3LYP/6-311+G(d,p) level of theory.

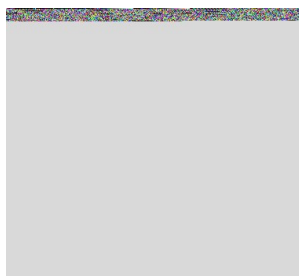

|    |             |             |             |
|----|-------------|-------------|-------------|
| P  | 0.02969900  | 1.68938500  | -0.58213700 |
| P  | -1.42185900 | -0.60723400 | 0.05705100  |
| P  | 1.38039400  | -0.67927500 | 0.05383900  |
| N  | -1.35026400 | 0.91066400  | -0.41958400 |
| N  | 1.37909900  | 0.83539900  | -0.44161100 |
| N  | -0.03814500 | -1.36724800 | 0.30251600  |
| Cl | 0.11133200  | 3.24094200  | 0.76115500  |
| Cl | 2.50249500  | -0.86133600 | 1.75123700  |
| Cl | -2.54263500 | -1.66551300 | -1.27885700 |
| Cl | -2.54902700 | -0.74355200 | 1.75243300  |
| Cl | 2.45381900  | -1.80090300 | -1.27213900 |
| O  | -0.01796300 | 2.43863800  | -1.99203100 |
| H  | 0.79364300  | 2.91219600  | -2.21939200 |

Color code: P = orange, N = blue, Cl = green, O = red, H = white

**Table S44.** Cartesian coordinates (in Angstrom, Å) of the tautomerization transition state without the interferences (**Tauto\_TS**) fully optimized at the B3LYP/6-311+G(d,p) of theory.

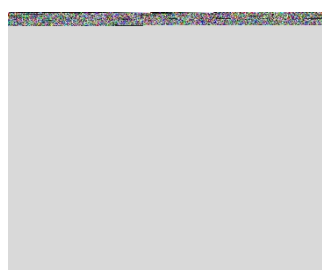

|    |             |             |             |
|----|-------------|-------------|-------------|
| P  | -0.16104700 | 1.74140500  | -0.66971500 |
| P  | -1.38464400 | -0.68839600 | 0.03873400  |
| P  | 1.43696900  | -0.55791000 | 0.15792400  |
| N  | -1.42999800 | 0.78697900  | -0.54453700 |
| N  | 1.32710800  | 0.95069100  | -0.42526100 |
| N  | 0.04918700  | -1.25561600 | 0.47650900  |
| Cl | -0.39930700 | 3.27336300  | 0.64440600  |
| Cl | 2.58161300  | -0.61513500 | 1.84001800  |
| Cl | -2.24035000 | -1.96398700 | -1.30059400 |
| Cl | -2.62264100 | -0.85696300 | 1.64550100  |
| Cl | 2.55192500  | -1.63503000 | -1.16531300 |
| O  | 0.35222100  | 2.27588600  | -2.01899900 |
| H  | 1.37789200  | 1.55383300  | -1.58740900 |

Color code: P = orange, N = blue, Cl = green, O = red, H = white

**Table S45.** Cartesian coordinates (in Angstrom, Å) of the product of the tautomerization reaction without the interferences (**Tauto\_P**) fully optimized at the B3LYP/6-311+G(d,p) level of theory.

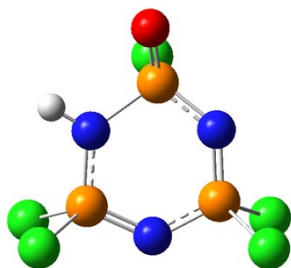

|    |             |             |             |
|----|-------------|-------------|-------------|
| P  | -0.22343300 | 1.75797100  | -0.93133100 |
| P  | -1.38752400 | -0.66252700 | 0.03249200  |
| P  | 1.43463200  | -0.57064600 | 0.10442300  |
| N  | -1.39841500 | 0.67269500  | -0.79061300 |
| N  | 1.26961600  | 0.83949200  | -0.72639200 |
| N  | 0.06153400  | -1.20119800 | 0.50372400  |
| Cl | -0.25519600 | 2.90073600  | 0.80545000  |
| Cl | 2.60651500  | -0.29668400 | 1.74483800  |
| Cl | -2.30057500 | -2.13018000 | -1.03911200 |
| Cl | -2.53973400 | -0.57071800 | 1.71305800  |
| Cl | 2.58989400  | -1.79655500 | -1.04101600 |
| O  | -0.08644200 | 2.60578300  | -2.12421200 |
| H  | 2.09189500  | 1.29266500  | -1.11179000 |

Color code: P = orange, N = blue, Cl = green, O = red, H = white

**Section 5.2.3. Cartesian Coordinates for chemical species appearing in the ring-opening reaction at B3LYP/6-311+G(d,p) level of theory**

**Table S46.** Cartesian coordinates (in Angstrom, Å) of the reactants (**R'**) for the HCl-initiated ring-opening reaction fully optimized at the B3LYP/6-311+G(d,p) level of theory.

|                                                                                   |    |             |             |             |
|-----------------------------------------------------------------------------------|----|-------------|-------------|-------------|
| 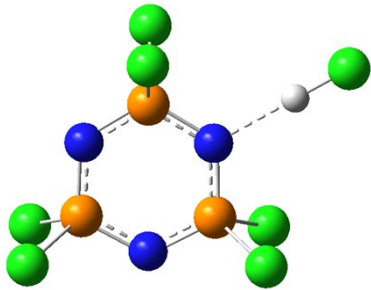 | N  | 0.00001900  | -1.24890300 | 1.35835700  |
|                                                                                   | N  | 0.00005400  | 1.11538200  | 0.00000000  |
|                                                                                   | N  | 0.00001900  | -1.24890300 | -1.35835700 |
|                                                                                   | P  | 0.00001900  | 0.34211900  | 1.41130100  |
|                                                                                   | P  | -0.00009500 | -2.08664900 | 0.00000000  |
|                                                                                   | P  | 0.00001900  | 0.34211900  | -1.41130100 |
|                                                                                   | Cl | 1.58504800  | 0.98757600  | 2.50911800  |
|                                                                                   | Cl | 1.58443700  | -3.36384900 | 0.00000000  |
|                                                                                   | Cl | -1.58504600 | 0.98762000  | 2.50905200  |
|                                                                                   | Cl | -1.58494300 | -3.36347800 | 0.00000000  |
|                                                                                   | Cl | 1.58504800  | 0.98757600  | -2.50911800 |
|                                                                                   | Cl | -1.58504600 | 0.98762000  | -2.50905200 |
|                                                                                   | Cl | 0.00049500  | 4.40151100  | 0.00000000  |
|                                                                                   | H  | 0.00032700  | 3.09534900  | 0.00000000  |

Color code: P = orange, N = blue, Cl = green, H = white

**Table S47.** Cartesian coordinates (in Angstrom, Å) of the transition state (**TS1**) for the HCl-initiated ring-opening reaction fully optimized at the B3LYP/6-311+G(d,p) level of theory.

|                                                                                     |    |             |             |             |
|-------------------------------------------------------------------------------------|----|-------------|-------------|-------------|
| 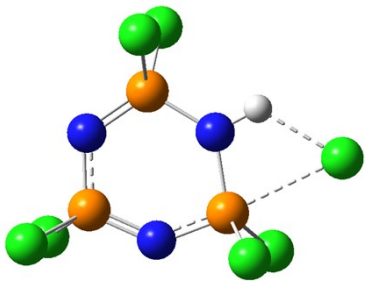 | N  | -1.92355900 | -0.13250200 | 0.00000000  |
|                                                                                     | N  | 0.44978800  | 1.20159900  | 0.00000000  |
|                                                                                     | N  | 0.44568400  | -1.39490600 | 0.00000000  |
|                                                                                     | P  | -1.21703000 | 1.26090800  | 0.00000000  |
|                                                                                     | P  | -1.10450200 | -1.52745100 | 0.00000000  |
|                                                                                     | P  | 1.49280300  | -0.16421700 | 0.00000000  |
|                                                                                     | Cl | -1.76277000 | 2.40671400  | 1.58310700  |
|                                                                                     | Cl | -1.76277000 | -2.62500600 | 1.58447800  |
|                                                                                     | Cl | -1.76277000 | 2.40671400  | -1.58310700 |
|                                                                                     | Cl | -1.76277000 | -2.62500600 | -1.58447800 |
|                                                                                     | Cl | 2.53725000  | -0.59662000 | 1.70245500  |
|                                                                                     | Cl | 2.53725000  | -0.59662000 | -1.70245500 |
|                                                                                     | Cl | 3.07171600  | 2.02214200  | 0.00000000  |
|                                                                                     | H  | 1.01023900  | 2.07263700  | 0.00000000  |

Color code: P = orange, N = blue, Cl = green, H = white

**Table S48.** Cartesian coordinates (in Angstrom, Å) of the intermediate (**Int**) for the HCl-initiated ring-opening reaction fully optimized at the B3LYP/6-311+G(d,p) level of theory.

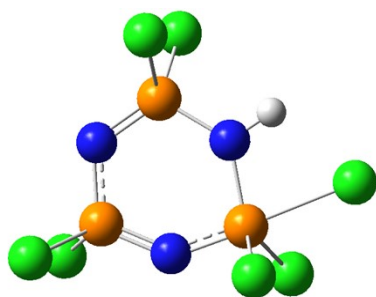

|    |             |             |             |
|----|-------------|-------------|-------------|
| N  | -1.86507000 | 0.52496700  | -0.00048500 |
| N  | 0.81384400  | 1.05811900  | -0.00022400 |
| N  | 0.02258700  | -1.37900200 | 0.00116700  |
| P  | -0.75792800 | 1.62165400  | -0.00021500 |
| P  | -1.48776200 | -1.05560200 | 0.00012600  |
| P  | 1.44211400  | -0.57101600 | 0.00033400  |
| Cl | -0.91448000 | 2.89071800  | 1.58185900  |
| Cl | -2.46188200 | -1.89921000 | 1.58369600  |
| Cl | -0.91416000 | 2.89106300  | -1.58200200 |
| Cl | -2.46031400 | -1.89987500 | -1.58412500 |
| Cl | 2.15141200  | -1.42597200 | 1.75383900  |
| Cl | 2.15046600  | -1.42734700 | -1.75292400 |
| Cl | 3.49000900  | 0.68757800  | -0.00071000 |
| H  | 1.55624900  | 1.75761900  | -0.00061900 |

Color code: P = orange, N = blue, Cl = green, H = white

**Table S49.** Cartesian coordinates (in Angstrom, Å) of the transition state (**TS2**) for the HCl-initiated ring-opening reaction fully optimized at the B3LYP/6-311+G(d,p) level of theory.

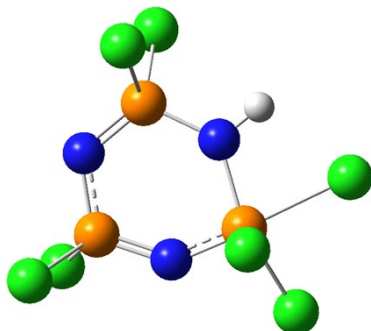

|    |             |             |             |
|----|-------------|-------------|-------------|
| N  | -1.95387000 | -0.00781100 | -0.03721500 |
| N  | 0.43744300  | 1.27432000  | -0.14777100 |
| N  | 0.42424300  | -1.28019600 | -0.10038100 |
| P  | -1.21000200 | 1.36711500  | -0.06682600 |
| P  | -1.12465000 | -1.39671500 | -0.04370600 |
| P  | 1.56903700  | -0.12997700 | -0.01738800 |
| Cl | -1.71247400 | 2.52826600  | 1.53361000  |
| Cl | -1.73425400 | -2.47898800 | 1.57470500  |
| Cl | -1.80729100 | 2.53122700  | -1.62794200 |
| Cl | -1.82748100 | -2.51199200 | -1.59699900 |
| Cl | 2.14980100  | -0.15334600 | 1.96575900  |
| Cl | 2.94874800  | -1.42266700 | -1.00597200 |
| Cl | 3.05367300  | 1.52694200  | -0.59785900 |
| H  | 0.92723800  | 2.15894200  | -0.25376300 |

Color code: P = orange, N = blue, Cl = green, H = white

**Table S50.** Cartesian coordinates (in Angstrom, Å) of the products (**P'**) for the HCl-initiated ring-opening reaction fully optimized at the B3LYP/6-311+G(d,p) level of theory.

|                                                                                   |    |             |             |             |
|-----------------------------------------------------------------------------------|----|-------------|-------------|-------------|
| 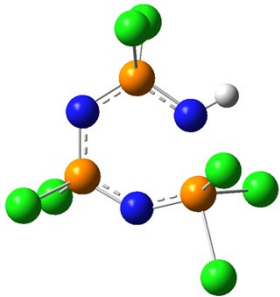 | N  | -1.74198500 | 0.69383000  | -0.22504500 |
|                                                                                   | N  | -0.15304100 | -1.36242200 | 0.36486800  |
|                                                                                   | N  | 0.95607500  | 1.00786900  | 0.02896300  |
|                                                                                   | P  | -1.64409800 | -0.86315000 | 0.00486500  |
|                                                                                   | P  | -0.47770200 | 1.65911300  | -0.06126000 |
|                                                                                   | P  | 1.57772000  | -0.45621100 | 0.07664800  |
|                                                                                   | Cl | -2.43386300 | -1.82851900 | -1.62196300 |
|                                                                                   | Cl | -0.51443900 | 2.97400400  | -1.60777700 |
|                                                                                   | Cl | -2.91012300 | -1.48813800 | 1.48582500  |
|                                                                                   | Cl | -0.75320900 | 2.86810700  | 1.55879300  |
|                                                                                   | Cl | 1.76895700  | -1.66964600 | -1.62917200 |
|                                                                                   | Cl | 3.59677300  | 0.27129000  | -0.16652400 |
|                                                                                   | Cl | 2.11552000  | -1.42875800 | 1.85800000  |
|                                                                                   | H  | -0.04961400 | -2.34299900 | 0.60262500  |

Color code: P = orange, N = blue, Cl = green, H = white

### Section 5.3 Electronic structures fully optimized at the B3LYP-D3/6-311+G(d,p) level of theory

#### Section 5.3.1. Cartesian Coordinates for the pivotal structure in the hydrolysis reaction followed by HCl-catalyzed tautomerization at the B3LYP-D3/6-311+G(d,p) level of theory

**Table S51.** Cartesian coordinates (in Angstrom, Å) of the reactants (**R**) for the hydrolysis reaction fully optimized at the B3LYP-D3/6-311+G(d,p) level of theory.

|                                                                                     |    |             |             |             |
|-------------------------------------------------------------------------------------|----|-------------|-------------|-------------|
| 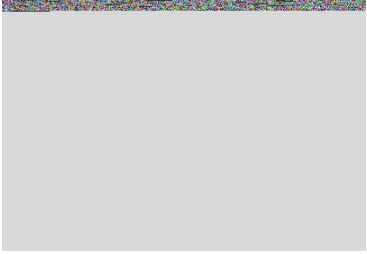 | P  | 0.62042300  | -1.37212500 | -0.02039400 |
|                                                                                     | P  | 0.52474700  | 1.43702100  | -0.00212700 |
|                                                                                     | P  | -1.84489400 | -0.05010900 | 0.02059600  |
|                                                                                     | N  | 1.34066300  | 0.05868000  | -0.02211700 |
|                                                                                     | N  | -0.96935000 | -1.38116600 | 0.01000300  |
|                                                                                     | N  | -1.06195000 | 1.33746900  | 0.02654000  |
|                                                                                     | Cl | 1.33514600  | -2.45838300 | 1.53179500  |
|                                                                                     | Cl | -3.10800100 | -0.10302200 | 1.60891700  |
|                                                                                     | Cl | 1.10016200  | 2.54695200  | -1.60462400 |
|                                                                                     | Cl | 1.16361300  | 2.54856200  | 1.56526400  |
|                                                                                     | Cl | -3.12008100 | -0.08384500 | -1.56122600 |
|                                                                                     | Cl | 1.26833400  | -2.41879000 | -1.63778300 |
|                                                                                     | H  | 4.61530700  | 0.17797400  | -0.62229400 |
|                                                                                     | O  | 4.26544800  | 0.16005100  | 0.27302200  |
|                                                                                     | H  | 3.30312300  | 0.12626400  | 0.16301300  |

Color code: P = orange, N = blue, Cl = green, O = red, H = white

**Table S52.** Cartesian coordinates (in Angstrom, Å) of the transition state (TS) for the hydrolysis reaction fully optimized at the B3LYP-D3/6-311+G(d,p) level of theory.

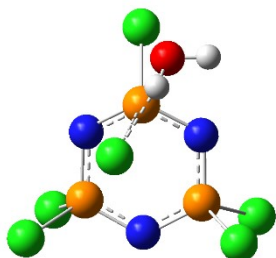

|    |             |             |             |
|----|-------------|-------------|-------------|
| P  | 0.63435900  | -1.37994800 | 0.36928500  |
| P  | 0.89790900  | 1.34572200  | 0.10344200  |
| P  | -1.64263800 | 0.14614400  | 0.03805900  |
| N  | 1.54571600  | -0.07368300 | 0.50453100  |
| N  | -0.95503300 | -1.24776800 | 0.47917100  |
| N  | -0.67182400 | 1.39619400  | -0.13682900 |
| Cl | 0.99180100  | -2.66208500 | 1.91187600  |
| Cl | -3.00134500 | 0.54794700  | 1.49611300  |
| Cl | 1.84520900  | 2.10903100  | -1.51699000 |
| Cl | 1.41045200  | 2.65578900  | 1.57084300  |
| Cl | -2.80501800 | -0.04903000 | -1.60110700 |
| Cl | 0.40675200  | -1.30285700 | -2.28666300 |
| H  | 1.88944300  | -2.24111900 | -1.50857100 |
| O  | 2.12081000  | -2.49740600 | -0.56478000 |
| H  | 2.95415600  | -2.06110700 | -0.32231200 |

Color code: P = orange, N = blue, Cl = green, O = red, H = white

**Table S53.** Cartesian coordinates (in Angstrom, Å) of the products with one hydrogen bond (**P\_1HB**) for the hydrolysis reaction fully optimized at the B3LYP-D3/6-311+G(d,p) level of theory.

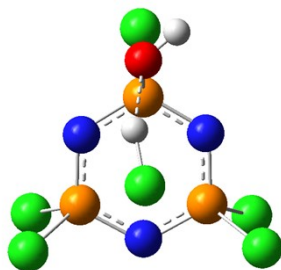

|    |             |             |             |
|----|-------------|-------------|-------------|
| P  | 0.00661000  | 1.18385800  | 1.24762800  |
| P  | 1.42246200  | -0.28978100 | -0.64767800 |
| P  | -1.36760300 | -0.16739400 | -0.75240300 |
| N  | 1.37832700  | 0.61925000  | 0.66155400  |
| N  | -1.35274100 | 0.68339400  | 0.59734300  |
| N  | 0.02970400  | -0.69653000 | -1.30427600 |
| Cl | 0.09826700  | 3.22769200  | 1.23460800  |
| Cl | -2.27354300 | 0.92863100  | -2.21754800 |
| Cl | 2.49845100  | -1.96476400 | -0.26057900 |
| Cl | 2.56568700  | 0.63490100  | -2.06246900 |
| Cl | -2.63958600 | -1.72544600 | -0.53185700 |
| Cl | -0.28418000 | -2.38986900 | 2.29925000  |
| H  | -0.45998300 | -1.23145300 | 2.84540700  |
| O  | -0.10969800 | 0.85107100  | 2.82015100  |
| H  | 0.62188200  | 1.19039800  | 3.35394300  |

Color code: P = orange, N = blue, Cl = green, O = red, H = white

**Table S54.** Cartesian coordinates (in Angstrom, Å) of the hydrogen bond configuration change transition state (**TS\_HB**) for the hydrolysis reaction fully optimized at the B3LYP-D3/6-311+G(d,p) level of theory.

|                                                                                   |    |             |             |             |
|-----------------------------------------------------------------------------------|----|-------------|-------------|-------------|
|                                                                                   | P  | -0.50436700 | -1.43809000 | 0.36191000  |
|                                                                                   | P  | 1.77870600  | -0.16143700 | -0.58899900 |
|                                                                                   | P  | -0.33544800 | 1.33582400  | 0.47444500  |
|  | N  | 0.90662500  | -1.48034000 | -0.38243200 |
|                                                                                   | N  | -1.15721200 | -0.01895400 | 0.65501300  |
|                                                                                   | N  | 1.13595700  | 1.22035000  | -0.12950600 |
|                                                                                   | Cl | -0.35368800 | -2.52169900 | 2.08856500  |
|                                                                                   | Cl | -0.22135600 | 2.30266000  | 2.26030800  |
|                                                                                   | Cl | 2.30854100  | -0.04265100 | -2.54920300 |
|                                                                                   | Cl | 3.58010600  | -0.37809400 | 0.33337400  |
|                                                                                   | Cl | -1.43629000 | 2.60849900  | -0.65298500 |
|                                                                                   | Cl | -4.08400700 | -0.16991800 | -1.55747800 |
|                                                                                   | H  | -3.15568100 | -0.83735500 | -0.95792000 |
|                                                                                   | O  | -1.61640800 | -2.23603800 | -0.47490200 |
|                                                                                   | H  | -1.36795700 | -3.12264900 | -0.76846500 |

Color code: P = orange, N = blue, Cl = green, O = red, H = white

**Table S55.** Cartesian coordinates (in Angstrom, Å) of the products with two hydrogen bonds (**P\_2HB**) for the hydrolysis reaction fully optimized at the B3LYP-D3/6-311+G(d,p) level of theory.

|                                                                                     |    |             |             |             |
|-------------------------------------------------------------------------------------|----|-------------|-------------|-------------|
|                                                                                     | P  | -0.55176000 | -1.41005200 | -0.18527100 |
|                                                                                     | P  | 1.93647000  | -0.17079800 | -0.26819300 |
|                                                                                     | P  | -0.34771500 | 1.35903500  | 0.26446000  |
|  | N  | 1.00109800  | -1.43195200 | -0.51142700 |
|                                                                                     | N  | -1.22970500 | 0.05383800  | -0.02978900 |
|                                                                                     | N  | 1.22588100  | 1.20354900  | 0.12705400  |
|                                                                                     | Cl | -0.90279100 | -2.43772300 | 1.54677700  |
|                                                                                     | Cl | -0.78077700 | 2.08494000  | 2.11581700  |
|                                                                                     | Cl | 3.07737600  | 0.11938000  | -1.92068200 |
|                                                                                     | Cl | 3.32241700  | -0.59870600 | 1.15761200  |
|                                                                                     | Cl | -1.02069100 | 2.83717400  | -0.95218900 |
|                                                                                     | Cl | -4.09201200 | -0.56412600 | -0.89502900 |
|                                                                                     | H  | -2.96283500 | -0.03638700 | -0.43213200 |
|                                                                                     | O  | -1.31868200 | -2.22908900 | -1.30068200 |
|                                                                                     | H  | -2.28341000 | -2.07769900 | -1.31741700 |

Color code: P = orange, N = blue, Cl = green, O = red, H = white

**Table S56.** Cartesian coordinates (in Angstrom, Å) of the synchronous proton transfer transition state (SPT\_TS) after the hydrolysis reaction fully optimized at the B3LYP-D3/6-311+G(d,p) level of theory.

|  |    |             |             |             |
|--|----|-------------|-------------|-------------|
|  | P  | -0.50041800 | -1.49465200 | -0.20072800 |
|  | P  | 1.89665100  | -0.07826300 | -0.30208200 |
|  | P  | -0.45619200 | 1.33334200  | 0.33886200  |
|  | N  | 1.01770900  | -1.35867600 | -0.62780200 |
|  | N  | -1.26243200 | -0.03381200 | -0.00855200 |
|  | N  | 1.11272200  | 1.21436700  | 0.22058000  |
|  | Cl | -0.61813100 | -2.47150000 | 1.58032700  |
|  | Cl | -0.94984300 | 1.97096800  | 2.19484800  |
|  | Cl | 2.97078700  | 0.40426700  | -1.94773900 |
|  | Cl | 3.32817000  | -0.52143700 | 1.06651600  |
|  | Cl | -1.21129800 | 2.76934100  | -0.86185800 |
|  | Cl | -3.79268600 | -0.65474900 | -1.04471900 |
|  | H  | -2.43882200 | -0.11001100 | -0.37332300 |
|  | O  | -1.34962900 | -2.31567400 | -1.21750400 |
|  | H  | -2.29973400 | -1.97128200 | -1.30239800 |

Color code: P = orange, N = blue, Cl = green, O = red, H = white

**Table S57.** Cartesian coordinates (in Angstrom, Å) of the final product (P) after the HCl-catalyzed tautomerization fully optimized at the B3LYP-D3/6-311+G(d,p) level of theory.

|  |    |             |             |             |
|--|----|-------------|-------------|-------------|
|  | P  | -0.65243600 | -1.48724800 | -0.21118500 |
|  | P  | 1.88334100  | -0.28254300 | -0.35959400 |
|  | P  | -0.25908900 | 1.43538200  | 0.27976000  |
|  | N  | 0.85259800  | -1.40787700 | -0.74379600 |
|  | N  | -1.21444900 | 0.15495000  | -0.09733300 |
|  | N  | 1.26422600  | 1.09551100  | 0.19825400  |
|  | Cl | -0.56921700 | -2.05292100 | 1.77566800  |
|  | Cl | -0.73228600 | 2.14058600  | 2.11808300  |
|  | Cl | 3.03868500  | 0.13057200  | -1.97018200 |
|  | Cl | 3.23485800  | -0.90406000 | 1.02562300  |
|  | Cl | -0.81999300 | 2.95081300  | -0.94191200 |
|  | Cl | -4.27138900 | -0.75464400 | -0.96852900 |
|  | H  | -2.22666300 | 0.27340500  | -0.18314200 |
|  | O  | -1.67058900 | -2.27620000 | -0.94297500 |
|  | H  | -3.27367100 | -1.62163000 | -1.06639500 |

Color code: P = orange, N = blue, Cl = green, O = red, H = white

**Section 5.3.2. Cartesian Coordinates for chemical species appearing in the tautomerization reaction without the interference from HCl at the B3LYP-D3/6-311+G(d,p) level of theory**

**Table S58.** Cartesian coordinates (in Angstrom, Å) of the reactants of the tautomerization reaction without the interferences of HCl (**Tauto\_R**) fully optimized at the B3LYP-D3/6-311+G(d,p) level of theory.

|  |    |             |             |             |
|--|----|-------------|-------------|-------------|
|  | P  | 0.03171900  | 1.66093400  | -0.65411400 |
|  | P  | -1.41893900 | -0.59632700 | 0.05738500  |
|  | P  | 1.37482800  | -0.67340200 | 0.05402800  |
|  | N  | -1.34967800 | 0.88424300  | -0.51975500 |
|  | N  | 1.37783600  | 0.80182400  | -0.54397100 |
|  | N  | -0.04026200 | -1.34054000 | 0.35584700  |
|  | Cl | 0.11590200  | 3.15408600  | 0.75226300  |
|  | Cl | 2.49181100  | -0.74101700 | 1.75786000  |
|  | Cl | -2.53352700 | -1.73168300 | -1.20928300 |
|  | Cl | -2.53733400 | -0.61956800 | 1.75859700  |
|  | Cl | 2.43550500  | -1.87607500 | -1.19883800 |
|  | O  | -0.00926000 | 2.45538200  | -2.03545200 |
|  | H  | 0.81463400  | 2.91253800  | -2.25089400 |

Color code: P = orange, N = blue, Cl = green, O = red, H = white

**Table S59.** Cartesian coordinates (in Angstrom, Å) of the tautomerization transition state without the interferences (**Tauto\_TS**) fully optimized at the B3LYP-D3/6-311+G(d,p) of theory.

|  |    |             |             |             |
|--|----|-------------|-------------|-------------|
|  | P  | -0.20638300 | 1.71313200  | -0.71705100 |
|  | P  | -1.35183200 | -0.72144600 | 0.03746600  |
|  | P  | 1.44998000  | -0.49589500 | 0.18485000  |
|  | N  | -1.43229200 | 0.70096400  | -0.65764100 |
|  | N  | 1.30269800  | 0.99372600  | -0.42717000 |
|  | N  | 0.08360200  | -1.20482500 | 0.55528500  |
|  | Cl | -0.54996800 | 3.19636700  | 0.62566000  |
|  | Cl | 2.62668900  | -0.49219300 | 1.83627900  |
|  | Cl | -2.11756100 | -2.11077400 | -1.23207800 |
|  | Cl | -2.61880200 | -0.81934300 | 1.62185700  |
|  | Cl | 2.54309100  | -1.58504700 | -1.14264600 |
|  | O  | 0.32015700  | 2.28925000  | -2.04226700 |
|  | H  | 1.36557100  | 1.60689500  | -1.58837300 |

Color code: P = orange, N = blue, Cl = green, O = red, H = white

**Table S60.** Cartesian coordinates (in Angstrom, Å) of the product of the tautomerization reaction without the interferences (**Tauto\_P**) fully optimized at the B3LYP-D3/6-311+G(d,p) level of theory.

|                                                                                   |    |             |             |             |
|-----------------------------------------------------------------------------------|----|-------------|-------------|-------------|
|  | P  | -0.19780800 | 1.71185600  | -0.99611300 |
|                                                                                   | P  | -1.39467100 | -0.63129700 | 0.02267800  |
|                                                                                   | P  | 1.42116900  | -0.57493200 | 0.09763100  |
|                                                                                   | N  | -1.38610300 | 0.63717200  | -0.90206600 |
|                                                                                   | N  | 1.27477600  | 0.76850100  | -0.83629200 |
|                                                                                   | N  | 0.04196800  | -1.16642100 | 0.52535100  |
|                                                                                   | Cl | -0.19837500 | 2.74603900  | 0.80993200  |
|                                                                                   | Cl | 2.56775700  | -0.17858000 | 1.72427100  |
|                                                                                   | Cl | -2.33870400 | -2.14712600 | -0.93539800 |
|                                                                                   | Cl | -2.52232800 | -0.38415900 | 1.69854200  |
|                                                                                   | Cl | 2.57378400  | -1.88228500 | -0.94327100 |
|                                                                                   | O  | -0.05550100 | 2.61500700  | -2.14553100 |
|                                                                                   | H  | 2.10286600  | 1.20466400  | -1.22695500 |

Color code: P = orange, N = blue, Cl = green, O = red, H = white

### Section 5.3.3. Cartesian Coordinates for chemical species appearing in the ring-opening reaction at the B3LYP-D3/6-311+G(d,p) level of theory

**Table S61.** Cartesian coordinates (in Angstrom, Å) of the reactants (**R'**) for the HCl-initiated ring-opening reaction fully optimized at the B3LYP-D3/6-311+G(d,p) level of theory.

|                                                                                     |    |             |             |             |
|-------------------------------------------------------------------------------------|----|-------------|-------------|-------------|
| 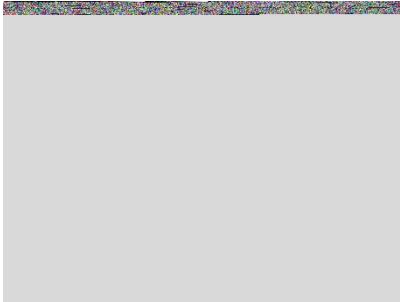 | N  | -0.05127000 | -1.23452500 | 1.35938400  |
|                                                                                     | N  | -0.00658500 | 1.12119300  | 0.00000000  |
|                                                                                     | N  | -0.05127000 | -1.23452500 | -1.35938400 |
|                                                                                     | P  | -0.05127000 | 0.35332400  | 1.40888100  |
|                                                                                     | P  | -0.05139300 | -2.06586700 | 0.00000000  |
|                                                                                     | P  | -0.05127000 | 0.35332400  | -1.40888100 |
|                                                                                     | Cl | 1.50117700  | 1.00712900  | 2.53185400  |
|                                                                                     | Cl | 1.53298100  | -3.33457000 | 0.00000000  |
|                                                                                     | Cl | -1.66772800 | 0.99964100  | 2.45127800  |
|                                                                                     | Cl | -1.63795400 | -3.33231000 | 0.00000000  |
|                                                                                     | Cl | 1.50117700  | 1.00712900  | -2.53185400 |
|                                                                                     | Cl | -1.66772800 | 0.99964100  | -2.45127800 |
|                                                                                     | Cl | 0.60002000  | 4.23391900  | 0.00000000  |
|                                                                                     | H  | 0.31982300  | 2.95343600  | 0.00000000  |

Color code: P = orange, N = blue, Cl = green, H = white

**Table S62.** Cartesian coordinates (in Angstrom, Å) of the transition state (**TS1**) for the HCl-initiated ring-opening reaction fully optimized at the B3LYP-D3/6-311+G(d,p) level of theory.

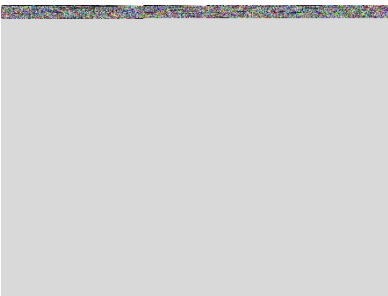

|    |             |             |             |
|----|-------------|-------------|-------------|
| N  | -1.74648300 | 0.79055200  | -0.21750400 |
| N  | 0.96851700  | 0.84065700  | -0.05357100 |
| N  | -0.29082500 | -1.37221700 | 0.42944200  |
| P  | -0.46761600 | 1.67821100  | -0.08327000 |
| P  | -1.68538200 | -0.80560900 | 0.02319800  |
| P  | 1.20846700  | -0.83574800 | 0.15784900  |
| Cl | -0.51227700 | 2.86692900  | 1.56105600  |
| Cl | -3.04959400 | -1.28997900 | 1.43612900  |
| Cl | -0.29478900 | 2.99458000  | -1.60001500 |
| Cl | -2.44339500 | -1.67489400 | -1.65712300 |
| Cl | 2.09144300  | -1.50223500 | 1.85854600  |
| Cl | 1.72749300  | -1.90272600 | -1.50151000 |
| Cl | 3.64405800  | 0.29159500  | -0.23755400 |
| H  | 1.87955900  | 1.31862300  | -0.18725100 |

Color code: P = orange, N = blue, Cl = green, H = white

**Table S63.** Cartesian coordinates (in Angstrom, Å) of the intermediate (**Int**) for the HCl-initiated ring-opening reaction fully optimized at the B3LYP-D3/6-311+G(d,p) level of theory.



|    |             |             |             |
|----|-------------|-------------|-------------|
| N  | -1.85904500 | 0.44990300  | -0.36695100 |
| N  | 0.78947400  | 1.09421700  | -0.17172300 |
| N  | 0.02948700  | -1.23148500 | 0.52656200  |
| P  | -0.80492100 | 1.58230600  | -0.15907000 |
| P  | -1.42847600 | -1.06820900 | 0.02615200  |
| P  | 1.43977000  | -0.48029400 | 0.15373400  |
| Cl | -1.09488400 | 2.64610700  | 1.55417100  |
| Cl | -2.70919800 | -1.74107300 | 1.44594600  |
| Cl | -0.92412200 | 2.98853300  | -1.59976300 |
| Cl | -1.91935800 | -2.21243400 | -1.59435900 |
| Cl | 2.30199800  | -0.92263000 | 1.97637900  |
| Cl | 1.94222800  | -1.71472800 | -1.44286200 |
| Cl | 3.44372800  | 0.69184300  | -0.33145800 |
| H  | 1.49829800  | 1.79899300  | -0.36440000 |

Color code: P = orange, N = blue, Cl = green, H = white

**Table S64.** Cartesian coordinates (in Angstrom, Å) of the transition state (TS2) for the HCl-initiated ring-opening reaction fully optimized at the B3LYP-D3/6-311+G(d,p) level of theory.

|  |    |             |             |             |
|--|----|-------------|-------------|-------------|
|  | N  | -1.94351300 | -0.01529600 | 0.02277800  |
|  | N  | 0.43176000  | 1.27318100  | -0.23982200 |
|  | N  | 0.42420000  | -1.27222900 | -0.30790300 |
|  | P  | -1.20539800 | 1.35747600  | -0.06585900 |
|  | P  | -1.10622800 | -1.39409900 | -0.06531200 |
|  | P  | 1.55260100  | -0.12284000 | -0.09537900 |
|  | Cl | -1.60194300 | 2.51997400  | 1.55565300  |
|  | Cl | -1.52722600 | -2.44682900 | 1.62907300  |
|  | Cl | -1.89065000 | 2.50622300  | -1.59473900 |
|  | Cl | -1.94987100 | -2.52782200 | -1.51886500 |
|  | Cl | 1.98902200  | -0.21621600 | 1.92148700  |
|  | Cl | 2.98732200  | -1.36783500 | -1.04442200 |
|  | Cl | 3.05701900  | 1.55187000  | -0.51357000 |
|  | H  | 0.91582400  | 2.16314200  | -0.31559800 |

Color code: P = orange, N = blue, Cl = green, H = white

**Table S65.** Cartesian coordinates (in Angstrom, Å) of the products (P') for the HCl-initiated ring-opening reaction fully optimized at the B3LYP-D3/6-311+G(d,p) level of theory.

|  |    |             |             |             |
|--|----|-------------|-------------|-------------|
|  | N  | -1.70361300 | 0.60981200  | -0.43412700 |
|  | N  | -0.11052300 | -1.27989300 | 0.54549700  |
|  | N  | 0.93672500  | 1.06892200  | 0.06303000  |
|  | P  | -1.57639200 | -0.90476100 | -0.02221500 |
|  | P  | -0.52035700 | 1.63938300  | -0.11176500 |
|  | P  | 1.56414100  | -0.39329600 | 0.13160600  |
|  | Cl | -2.15508700 | -2.05866600 | -1.60139800 |
|  | Cl | -0.52618500 | 3.01188900  | -1.59570200 |
|  | Cl | -2.92753800 | -1.44670500 | 1.40618900  |
|  | Cl | -0.99582500 | 2.74089000  | 1.53764800  |
|  | Cl | 1.67367000  | -1.63459400 | -1.55993500 |
|  | Cl | 3.56287500  | 0.33556600  | -0.23120500 |
|  | Cl | 2.19891100  | -1.28347600 | 1.92069500  |
|  | H  | 0.00704000  | -2.21514400 | 0.91787400  |

Color code: P = orange, N = blue, Cl = green, H = white

## Section 5.4 Electronic structures fully optimized at the B3LYP/aTZ level of theory

### Section 5.4.1. Cartesian Coordinates for the pivotal structure in the hydrolysis reaction followed by HCl-catalyzed tautomerization at the B3LYP/aTZ level of theory

**Table S66.** Cartesian coordinates (in Angstrom, Å) of the reactants (**R**) for the hydrolysis reaction fully optimized at the B3LYP/aTZ level of theory.

|                                                                                   |    |             |             |             |
|-----------------------------------------------------------------------------------|----|-------------|-------------|-------------|
|  | P  | 0.58016600  | -1.36580000 | -0.00687000 |
|                                                                                   | P  | 0.48435400  | 1.42860700  | 0.01138200  |
|                                                                                   | P  | -1.87847800 | -0.05132200 | 0.01079100  |
|                                                                                   | N  | 1.31544400  | 0.05833000  | -0.00625600 |
|                                                                                   | N  | -1.01232300 | -1.39055900 | 0.00088500  |
|                                                                                   | N  | -1.10606400 | 1.34410500  | 0.01864800  |
|                                                                                   | Cl | 1.27219300  | -2.45997300 | 1.55374300  |
|                                                                                   | Cl | -3.15712600 | -0.10549800 | 1.58830600  |
|                                                                                   | Cl | 1.08029400  | 2.56502800  | -1.56549000 |
|                                                                                   | Cl | 1.10035700  | 2.54720600  | 1.58650600  |
|                                                                                   | Cl | -3.16284600 | -0.08516800 | -1.56374100 |
|                                                                                   | Cl | 1.25179100  | -2.43794200 | -1.59825100 |
|                                                                                   | H  | 4.79223900  | 0.18445000  | -0.64556500 |
|                                                                                   | O  | 4.41509400  | 0.16303500  | 0.23821300  |
|                                                                                   | H  | 3.45759500  | 0.13103500  | 0.10628400  |

Color code: P = orange, N = blue, Cl = green, O = red, H = white

**Table S67.** Cartesian coordinates (in Angstrom, Å) of the transition state (**TS**) for the hydrolysis reaction fully optimized at the B3LYP/aTZ level of theory.

|                                                                                     |    |             |             |             |
|-------------------------------------------------------------------------------------|----|-------------|-------------|-------------|
| 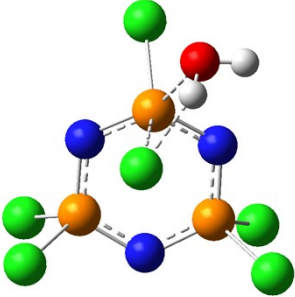 | P  | 0.60352300  | 1.38574500  | -0.37459500 |
|                                                                                     | P  | 0.95147000  | -1.32976200 | -0.01038400 |
|                                                                                     | P  | -1.61972000 | -0.23019600 | -0.05398000 |
|                                                                                     | N  | 1.56907500  | 0.10976000  | -0.37653100 |
|                                                                                     | N  | -0.97782700 | 1.17255500  | -0.51545200 |
|                                                                                     | N  | -0.62050800 | -1.44860800 | 0.20176500  |
|                                                                                     | Cl | 0.91498600  | 2.52777400  | -2.04581300 |
|                                                                                     | Cl | -2.93256500 | -0.73111600 | -1.52388200 |
|                                                                                     | Cl | 1.89060100  | -2.07387200 | 1.62527100  |
|                                                                                     | Cl | 1.55418400  | -2.62726300 | -1.45728400 |
|                                                                                     | Cl | -2.84732400 | -0.03404600 | 1.54055100  |
|                                                                                     | Cl | 0.27487100  | 1.66290400  | 2.23654100  |
|                                                                                     | H  | 1.74339700  | 2.46599300  | 1.39156500  |
|                                                                                     | O  | 2.00711500  | 2.60645900  | 0.42394500  |
|                                                                                     | H  | 2.84459300  | 2.14510000  | 0.25127200  |

Color code: P = orange, N = blue, Cl = green, O = red, H = white

**Table S68.** Cartesian coordinates (in Angstrom, Å) of the products with one hydrogen bond (**P\_1HB**) for the hydrolysis reaction fully optimized at the B3LYP/aTZ level of theory.

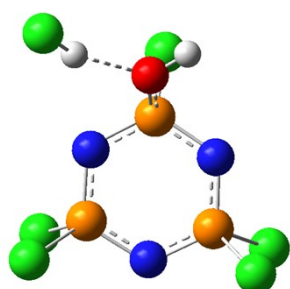

|    |             |             |             |
|----|-------------|-------------|-------------|
| P  | -0.75152400 | -0.99570500 | 0.64687700  |
| P  | 1.73299400  | -0.66710900 | -0.55600300 |
| P  | 0.21819600  | 1.55870200  | 0.16836400  |
| N  | 0.54752800  | -1.60799600 | -0.05355900 |
| N  | -0.94379700 | 0.58286300  | 0.65878900  |
| N  | 1.55395600  | 0.91168600  | -0.41871500 |
| Cl | -0.84954100 | -1.72265000 | 2.55635800  |
| Cl | 0.72331000  | 2.81904500  | 1.68214900  |
| Cl | 2.14517300  | -1.12900000 | -2.49421000 |
| Cl | 3.46639800  | -1.20384000 | 0.36526000  |
| Cl | -0.55670300 | 2.84699900  | -1.19811900 |
| Cl | -5.13164300 | -0.52717000 | -1.16343000 |
| H  | -3.95264200 | -0.68686300 | -0.66790000 |
| O  | -2.07912200 | -1.60149800 | -0.01615200 |
| H  | -2.06206800 | -2.56285000 | -0.11321400 |

Color code: P = orange, N = blue, Cl = green, O = red, H = white

**Table S69.** Cartesian coordinates (in Angstrom, Å) of the hydrogen bond configuration change transition state (**TS\_HB**) for the hydrolysis reaction fully optimized at the B3LYP/aTZ level of theory.

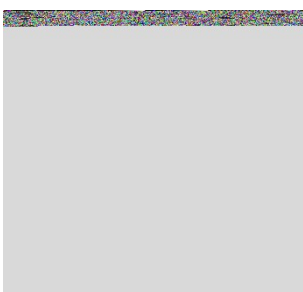

|    |             |             |             |
|----|-------------|-------------|-------------|
| P  | -0.51192900 | -1.36680300 | 0.27471200  |
| P  | 1.89280800  | -0.22160400 | -0.52181900 |
| P  | -0.19223900 | 1.38891600  | 0.39088100  |
| N  | 0.94987100  | -1.49623100 | -0.35645800 |
| N  | -1.10828400 | 0.08907800  | 0.52580400  |
| N  | 1.30799100  | 1.20754200  | -0.12177100 |
| Cl | -0.55050900 | -2.45147100 | 2.01125800  |
| Cl | -0.15109400 | 2.37651000  | 2.16853100  |
| Cl | 2.56202400  | -0.15850400 | -2.44227800 |
| Cl | 3.62713300  | -0.51775400 | 0.50119300  |
| Cl | -1.15138300 | 2.72511600  | -0.80011200 |
| Cl | -4.81268600 | -0.50115600 | -1.19618900 |
| H  | -3.60919700 | -0.68089200 | -0.77725800 |
| O  | -1.59750500 | -2.11624400 | -0.62538400 |
| H  | -1.38666500 | -3.03610400 | -0.83015600 |

Color code: P = orange, N = blue, Cl = green, O = red, H = white

**Table S70.** Cartesian coordinates (in Angstrom, Å) of the products with two hydrogen bonds (**P\_2HB**) for the hydrolysis reaction fully optimized at the B3LYP/aTZ level of theory.

|                                                                                   |    |             |             |             |
|-----------------------------------------------------------------------------------|----|-------------|-------------|-------------|
|                                                                                   | P  | -0.58417900 | -1.38423600 | -0.11396600 |
|                                                                                   | P  | 1.93742700  | -0.22023100 | -0.25584900 |
|                                                                                   | P  | -0.28811400 | 1.37810100  | 0.26328800  |
|  | N  | 0.97601000  | -1.47774400 | -0.40097800 |
|                                                                                   | N  | -1.22147600 | 0.09056100  | 0.07380600  |
|                                                                                   | N  | 1.28341400  | 1.19306200  | 0.10333900  |
|                                                                                   | Cl | -1.02955300 | -2.47454200 | 1.55747300  |
|                                                                                   | Cl | -0.66447500 | 2.23752700  | 2.06948300  |
|                                                                                   | Cl | 3.02879400  | -0.03282300 | -1.95948600 |
|                                                                                   | Cl | 3.38311400  | -0.61910600 | 1.11660400  |
|                                                                                   | Cl | -0.94274900 | 2.81859100  | -1.01343700 |
|                                                                                   | Cl | -4.19241000 | -0.52083100 | -0.88725500 |
|                                                                                   | H  | -3.09546200 | 0.00446700  | -0.38925100 |
|                                                                                   | O  | -1.34368900 | -2.15169200 | -1.27136900 |
|                                                                                   | H  | -2.30394800 | -1.98648400 | -1.29255100 |

Color code: P = orange, N = blue, Cl = green, O = red, H = white

**Table S71.** Cartesian coordinates (in Angstrom, Å) of the synchronous proton transfer transition state (**SPT\_TS**) after the hydrolysis reaction fully optimized at the B3LYP/aTZ level of theory.

|                                                                                     |    |             |             |             |
|-------------------------------------------------------------------------------------|----|-------------|-------------|-------------|
|                                                                                     | P  | 0.02694500  | 1.68061000  | -0.57696200 |
|                                                                                     | P  | -1.40994200 | -0.60789700 | 0.05519700  |
|                                                                                     | P  | 1.37345800  | -0.67150800 | 0.05477500  |
|  | N  | -1.35708700 | 0.90969900  | -0.42199300 |
|                                                                                     | N  | 1.38461300  | 0.84505000  | -0.43060600 |
|                                                                                     | N  | -0.03440300 | -1.37840300 | 0.30678300  |
|                                                                                     | Cl | 0.09763400  | 3.23318500  | 0.76004600  |
|                                                                                     | Cl | 2.50055500  | -0.86128100 | 1.74115900  |
|                                                                                     | Cl | -2.53008300 | -1.66672900 | -1.27321900 |
|                                                                                     | Cl | -2.54240800 | -0.74786100 | 1.74067300  |
|                                                                                     | Cl | 2.44937700  | -1.78252200 | -1.27072400 |
|                                                                                     | O  | -0.02172900 | 2.43274000  | -1.98106800 |
|                                                                                     | H  | 0.78879000  | 2.91409000  | -2.19080800 |

Color code: P = orange, N = blue, Cl = green, O = red, H = white

**Table S72.** Cartesian coordinates (in Angstrom, Å) of the final product (**P**) after the HCl-catalyzed tautomerization fully optimized at the B3LYP/aTZ level of theory.

|                                                                                   |    |             |             |             |
|-----------------------------------------------------------------------------------|----|-------------|-------------|-------------|
|  | P  | -0.16387500 | 1.73199000  | -0.65047200 |
|                                                                                   | P  | -1.36994400 | -0.69332800 | 0.03708600  |
|                                                                                   | P  | 1.43115200  | -0.54768300 | 0.15822800  |
|                                                                                   | N  | -1.43903500 | 0.78488300  | -0.53361000 |
|                                                                                   | N  | 1.32839300  | 0.97306700  | -0.38629900 |
|                                                                                   | N  | 0.05845500  | -1.27507100 | 0.47258600  |
|                                                                                   | Cl | -0.42451300 | 3.27392100  | 0.64292400  |
|                                                                                   | Cl | 2.58570500  | -0.62966300 | 1.82507300  |
|                                                                                   | Cl | -2.22635900 | -1.95898800 | -1.30345600 |
|                                                                                   | Cl | -2.60780800 | -0.88252800 | 1.63604400  |
|                                                                                   | Cl | 2.54857300  | -1.59138700 | -1.18070900 |
|                                                                                   | O  | 0.33200400  | 2.26355900  | -2.00284500 |
|                                                                                   | H  | 1.36411800  | 1.55365900  | -1.55649500 |

Color code: P = orange, N = blue, Cl = green, O = red, H = white

#### Section 5.4.2. Cartesian Coordinates for chemical species appearing in the tautomerization reaction without the interference from HCl at the B3LYP/aTZ level of theory

**Table S73.** Cartesian coordinates (in Angstrom, Å) of the reactants of the tautomerization reaction without the interferences of HCl (**Tauto\_R**) fully optimized at the B3LYP/aTZ level of theory.

|                                                                                     |    |             |             |             |
|-------------------------------------------------------------------------------------|----|-------------|-------------|-------------|
|  | P  | -0.22865200 | 1.75631000  | -0.90058500 |
|                                                                                     | P  | -1.37083200 | -0.67561400 | 0.02968400  |
|                                                                                     | P  | 1.43103900  | -0.56525100 | 0.10322200  |
|                                                                                     | N  | -1.40788900 | 0.67914000  | -0.75987000 |
|                                                                                     | N  | 1.26396800  | 0.86868700  | -0.67239200 |
|                                                                                     | N  | 0.07195100  | -1.23773200 | 0.48612000  |
|                                                                                     | Cl | -0.28830000 | 2.93703700  | 0.80084800  |
|                                                                                     | Cl | 2.59891200  | -0.33619500 | 1.74554600  |
|                                                                                     | Cl | -2.29233500 | -2.11473300 | -1.06357800 |
|                                                                                     | Cl | -2.52013200 | -0.62451900 | 1.70746000  |
|                                                                                     | Cl | 2.60123900  | -1.73822800 | -1.07036800 |
|                                                                                     | O  | -0.09261000 | 2.58443600  | -2.10559300 |
|                                                                                     | H  | 2.08180100  | 1.32503300  | -1.05551400 |

Color code: P = orange, N = blue, Cl = green, O = red, H = white

**Table S74.** Cartesian coordinates (in Angstrom, Å) of the tautomerization transition state without the interferences (**Tauto\_TS**) fully optimized at the B3LYP/aTZ of theory.

|                                                                                   |    |             |             |             |
|-----------------------------------------------------------------------------------|----|-------------|-------------|-------------|
|  | P  | -0.16387500 | 1.73199000  | -0.65047200 |
|                                                                                   | P  | -1.36994400 | -0.69332800 | 0.03708600  |
|                                                                                   | P  | 1.43115200  | -0.54768300 | 0.15822800  |
|                                                                                   | N  | -1.43903500 | 0.78488300  | -0.53361000 |
|                                                                                   | N  | 1.32839300  | 0.97306700  | -0.38629900 |
|                                                                                   | N  | 0.05845500  | -1.27507100 | 0.47258600  |
|                                                                                   | Cl | -0.42451300 | 3.27392100  | 0.64292400  |
|                                                                                   | Cl | 2.58570500  | -0.62966300 | 1.82507300  |
|                                                                                   | Cl | -2.22635900 | -1.95898800 | -1.30345600 |
|                                                                                   | Cl | -2.60780800 | -0.88252800 | 1.63604400  |
|                                                                                   | Cl | 2.54857300  | -1.59138700 | -1.18070900 |
|                                                                                   | O  | 0.33200400  | 2.26355900  | -2.00284500 |
|                                                                                   | H  | 1.36411800  | 1.55365900  | -1.55649500 |

Color code: P = orange, N = blue, Cl = green, O = red, H = white

**Table S75.** Cartesian coordinates (in Angstrom, Å) of the product of the tautomerization reaction without the interferences (**Tauto\_P**) fully optimized at the B3LYP/aTZ level of theory.

|                                                                                     |    |             |             |             |
|-------------------------------------------------------------------------------------|----|-------------|-------------|-------------|
|  | P  | -0.22865200 | 1.75631000  | -0.90058500 |
|                                                                                     | P  | -1.37083200 | -0.67561400 | 0.02968400  |
|                                                                                     | P  | 1.43103900  | -0.56525100 | 0.10322200  |
|                                                                                     | N  | -1.40788900 | 0.67914000  | -0.75987000 |
|                                                                                     | N  | 1.26396800  | 0.86868700  | -0.67239200 |
|                                                                                     | N  | 0.07195100  | -1.23773200 | 0.48612000  |
|                                                                                     | Cl | -0.28830000 | 2.93703700  | 0.80084800  |
|                                                                                     | Cl | 2.59891200  | -0.33619500 | 1.74554600  |
|                                                                                     | Cl | -2.29233500 | -2.11473300 | -1.06357800 |
|                                                                                     | Cl | -2.52013200 | -0.62451900 | 1.70746000  |
|                                                                                     | Cl | 2.60123900  | -1.73822800 | -1.07036800 |
|                                                                                     | O  | -0.09261000 | 2.58443600  | -2.10559300 |
|                                                                                     | H  | 2.08180100  | 1.32503300  | -1.05551400 |

Color code: P = orange, N = blue, Cl = green, O = red, H = white

**Section 5.4.3. Cartesian Coordinates for chemical species appearing in the ring-opening reaction at the B3LYP/aTZ level of theory**

**Table S76.** Cartesian coordinates (in Angstrom, Å) of the reactants (**R'**) for the HCl-initiated ring-opening reaction fully optimized at the B3LYP/aTZ level of theory.

|  |    |             |             |             |
|--|----|-------------|-------------|-------------|
|  | N  | -0.00006800 | -1.26170700 | 1.36734900  |
|  | N  | -0.00006600 | 1.11472800  | 0.00000000  |
|  | N  | -0.00006800 | -1.26170700 | -1.36734900 |
|  | P  | -0.00001600 | 0.32962300  | 1.40005300  |
|  | P  | -0.00004400 | -2.08292500 | 0.00000000  |
|  | P  | -0.00001600 | 0.32962300  | -1.40005300 |
|  | Cl | 1.57599400  | 0.97544300  | 2.50324900  |
|  | Cl | 1.57615900  | -3.36361900 | 0.00000000  |
|  | Cl | -1.57588000 | 0.97553300  | 2.50338700  |
|  | Cl | -1.57618100 | -3.36368900 | 0.00000000  |
|  | Cl | 1.57599400  | 0.97544300  | -2.50324900 |
|  | Cl | -1.57588000 | 0.97553300  | -2.50338700 |
|  | Cl | -0.00004600 | 4.47482300  | 0.00000000  |
|  | H  | -0.00016300 | 3.17505400  | 0.00000000  |

Color code: P = orange, N = blue, Cl = green, H = white

**Table S77.** Cartesian coordinates (in Angstrom, Å) of the transition state (**TS1**) for the HCl-initiated ring-opening reaction fully optimized at the B3LYP/aTZ level of theory.

|  |    |             |             |             |
|--|----|-------------|-------------|-------------|
|  | N  | -1.93333800 | -0.13221600 | 0.00000000  |
|  | N  | 0.44880900  | 1.20107700  | 0.00000000  |
|  | N  | 0.45706400  | -1.40303100 | 0.00000000  |
|  | P  | -1.20960100 | 1.25347800  | 0.00000000  |
|  | P  | -1.09543700 | -1.51361500 | 0.00000000  |
|  | P  | 1.48776600  | -0.15561100 | 0.00000000  |
|  | Cl | -1.75743800 | 2.40107400  | 1.57383600  |
|  | Cl | -1.75306200 | -2.61739900 | 1.57557300  |
|  | Cl | -1.75743800 | 2.40107400  | -1.57383600 |
|  | Cl | -1.75306200 | -2.61739900 | -1.57557300 |
|  | Cl | 2.52135800  | -0.58043800 | 1.70272800  |
|  | Cl | 2.52135800  | -0.58043800 | -1.70272800 |
|  | Cl | 3.06622300  | 1.98283800  | 0.00000000  |
|  | H  | 1.00535500  | 2.06899300  | 0.00000000  |

Color code: P = orange, N = blue, Cl = green, H = white

**Table S78.** Cartesian coordinates (in Angstrom, Å) of the intermediate (**Int**) for the HCl-initiated ring-opening reaction fully optimized at the B3LYP/aTZ level of theory.

|  |    |             |             |             |
|--|----|-------------|-------------|-------------|
|  | N  | -1.87311800 | 0.52775300  | -0.00050700 |
|  | N  | 0.81237400  | 1.05082300  | -0.00017200 |
|  | N  | 0.02441400  | -1.39969000 | 0.00125200  |
|  | P  | -0.75134900 | 1.61197700  | -0.00020200 |
|  | P  | -1.48164900 | -1.04610400 | 0.00012600  |
|  | P  | 1.43214400  | -0.56797000 | 0.00034500  |
|  | Cl | -0.90850100 | 2.88133300  | 1.57312200  |
|  | Cl | -2.45820000 | -1.89318500 | 1.57495100  |
|  | Cl | -0.90810200 | 2.88165800  | -1.57326300 |
|  | Cl | -2.45652600 | -1.89386900 | -1.57543900 |
|  | Cl | 2.14750500  | -1.39876600 | 1.75147600  |
|  | Cl | 2.14641900  | -1.40017000 | -1.75060400 |
|  | Cl | 3.48200800  | 0.67681100  | -0.00078600 |
|  | H  | 1.55766400  | 1.74309400  | -0.00058100 |

Color code: P = orange, N = blue, Cl = green, H = white

**Table S79.** Cartesian coordinates (in Angstrom, Å) of the transition state (**TS2**) for the HCl-initiated ring-opening reaction fully optimized at the B3LYP/aTZ level of theory.

|  |    |             |             |             |
|--|----|-------------|-------------|-------------|
|  | N  | -1.96583500 | -0.00481000 | -0.03851700 |
|  | N  | 0.43613800  | 1.26730400  | -0.14287600 |
|  | N  | 0.42941500  | -1.29010500 | -0.14229900 |
|  | P  | -1.20406400 | 1.36207000  | -0.06590000 |
|  | P  | -1.12279700 | -1.38223400 | -0.05497400 |
|  | P  | 1.56137200  | -0.12842800 | -0.02636600 |
|  | Cl | -1.70315600 | 2.52237800  | 1.52800000  |
|  | Cl | -1.70221000 | -2.46300000 | 1.57059600  |
|  | Cl | -1.80096200 | 2.53104600  | -1.61506300 |
|  | Cl | -1.84762800 | -2.50919700 | -1.58188900 |
|  | Cl | 2.12289100  | -0.14816700 | 1.95498000  |
|  | Cl | 2.97046200  | -1.41174100 | -0.97056900 |
|  | Cl | 3.04001600  | 1.51051900  | -0.60337600 |
|  | H  | 0.92652000  | 2.14948300  | -0.23349400 |

Color code: P = orange, N = blue, Cl = green, H = white

**Table S80.** Cartesian coordinates (in Angstrom, Å) of the products (**P'**) for the HCl-initiated ring-opening reaction fully optimized at the B3LYP/aTZ level of theory.

|                                                                                   |    |             |             |             |
|-----------------------------------------------------------------------------------|----|-------------|-------------|-------------|
| 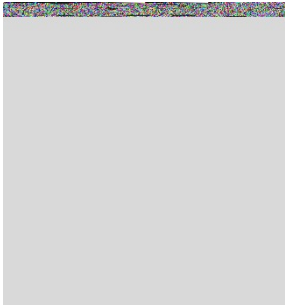 | N  | -1.75545400 | 0.70322800  | -0.22271800 |
|                                                                                   | N  | -0.14000100 | -1.34333400 | 0.38214400  |
|                                                                                   | N  | 0.95839700  | 1.01440500  | 0.04604400  |
|                                                                                   | P  | -1.63044300 | -0.85077700 | 0.00325400  |
|                                                                                   | P  | -0.47756600 | 1.65490900  | -0.05591100 |
|                                                                                   | P  | 1.54391000  | -0.47066600 | 0.08209600  |
|                                                                                   | Cl | -2.38808700 | -1.82815200 | -1.62133300 |
|                                                                                   | Cl | -0.50861300 | 2.96258700  | -1.60374200 |
|                                                                                   | Cl | -2.88870800 | -1.50564800 | 1.46484600  |
|                                                                                   | Cl | -0.76717300 | 2.87694500  | 1.54474700  |
|                                                                                   | Cl | 1.73552400  | -1.65216900 | -1.63787600 |
|                                                                                   | Cl | 3.57278600  | 0.22620400  | -0.17905200 |
|                                                                                   | Cl | 2.12301300  | -1.43085000 | 1.85066900  |
|                                                                                   | H  | -0.04061400 | -2.32231100 | 0.61567700  |

Color code: P = orange, N = blue, Cl = green, H = white

## Section 5.5 Electronic structures fully optimized at the B3PW91/6-311+G(d,p) level of theory

### Section 5.5.1. Cartesian Coordinates for the pivotal structure in the hydrolysis reaction followed by HCl-catalyzed tautomerization at the B3PW91/6-311+G(d,p) level of theory

**Table S81.** Cartesian coordinates (in Angstrom, Å) of the reactants (**R**) for the hydrolysis reaction fully optimized at the B3PW91/6-311+G(d,p) level of theory.

|                                                                                     |    |             |             |             |
|-------------------------------------------------------------------------------------|----|-------------|-------------|-------------|
| 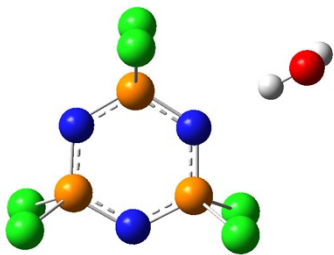 | P  | 0.60571900  | -1.37087800 | -0.01478000 |
|                                                                                     | P  | 0.50981600  | 1.43524200  | 0.00373900  |
|                                                                                     | P  | -1.86031100 | -0.05062900 | 0.01531000  |
|                                                                                     | N  | 1.32947400  | 0.05859300  | -0.00941800 |
|                                                                                     | N  | -0.98379800 | -1.37991500 | 0.00240400  |
|                                                                                     | N  | -1.07656300 | 1.33542000  | 0.02122100  |
|                                                                                     | Cl | 1.30079300  | -2.45923900 | 1.53336500  |
|                                                                                     | Cl | -3.11935900 | -0.10452000 | 1.59461000  |
|                                                                                     | Cl | 1.08928700  | 2.54623500  | -1.58413200 |
|                                                                                     | Cl | 1.13023600  | 2.54857800  | 1.56572200  |
|                                                                                     | Cl | -3.13434700 | -0.08345400 | -1.55400900 |
|                                                                                     | Cl | 1.25979700  | -2.41906800 | -1.61624700 |
|                                                                                     | H  | 4.66685400  | 0.18042600  | -0.64738200 |
|                                                                                     | O  | 4.33867500  | 0.16109800  | 0.25414600  |
|                                                                                     | H  | 3.37641600  | 0.12764600  | 0.16403500  |

Color code: P = orange, N = blue, Cl = green, O = red, H = white

**Table S82.** Cartesian coordinates (in Angstrom, Å) of the transition state (TS) for the hydrolysis reaction fully optimized at the B3PW91/6-311+G(d,p) level of theory.

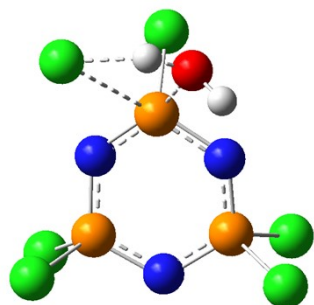

|    |             |             |             |
|----|-------------|-------------|-------------|
| P  | -1.17271200 | -0.87160400 | 0.17122800  |
| P  | 1.65131400  | -0.70321700 | -0.18695700 |
| P  | 0.19115700  | 1.61753200  | 0.10311000  |
| N  | 0.27598800  | -1.50972700 | -0.17641400 |
| N  | -1.05988200 | 0.69773300  | 0.45937700  |
| N  | 1.58225100  | 0.88627900  | -0.17791200 |
| Cl | -2.01825700 | -1.69859400 | 1.79010000  |
| Cl | 0.41029400  | 2.92643600  | 1.62067900  |
| Cl | 2.69786300  | -1.29511700 | -1.81395800 |
| Cl | 2.83166100  | -1.34569900 | 1.33383900  |
| Cl | -0.22483600 | 2.82214900  | -1.46876600 |
| Cl | -3.50490200 | -0.18682400 | -0.94220200 |
| H  | -2.70998600 | -1.71200700 | -1.35571000 |
| O  | -1.87391200 | -2.21974600 | -0.98658500 |
| H  | -1.19456200 | -2.47065000 | -1.63245600 |

Color code: P = orange, N = blue, Cl = green, O = red, H = white

**Table S83.** Cartesian coordinates (in Angstrom, Å) of the products with one hydrogen bond (P\_1HB) for the hydrolysis reaction fully optimized at the B3PW91/6-311+G(d,p) level of theory.

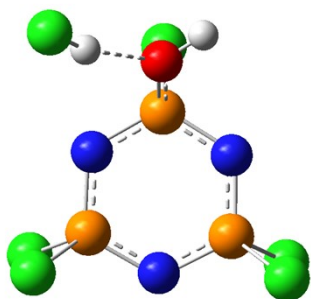

|    |             |             |             |
|----|-------------|-------------|-------------|
| P  | -0.68629700 | -1.09830100 | 0.65422500  |
| P  | 1.74365500  | -0.55158800 | -0.59142200 |
| P  | 0.07294200  | 1.53954300  | 0.22518600  |
| N  | 0.64053700  | -1.58442700 | -0.08717100 |
| N  | -0.99553300 | 0.45813300  | 0.70145700  |
| N  | 1.43300000  | 0.99800900  | -0.40377100 |
| Cl | -0.69082100 | -1.87184300 | 2.53386100  |
| Cl | 0.52063700  | 2.77196700  | 1.76616500  |
| Cl | 2.13479500  | -0.92690100 | -2.54159100 |
| Cl | 3.52129400  | -0.96811800 | 0.28321900  |
| Cl | -0.81929100 | 2.79309100  | -1.08343400 |
| Cl | -4.84912000 | -0.59550000 | -1.24397100 |
| H  | -3.70624900 | -0.86428000 | -0.70623300 |
| O  | -1.97465900 | -1.78607000 | -0.01096800 |
| H  | -1.89441400 | -2.73981200 | -0.14173100 |

Color code: P = orange, N = blue, Cl = green, O = red, H = white

**Table S84.** Cartesian coordinates (in Angstrom, Å) of the hydrogen bond configuration change transition state (**TS\_HB**) for the hydrolysis reaction fully optimized at the B3PW91/6-311+G(d,p) level of theory.

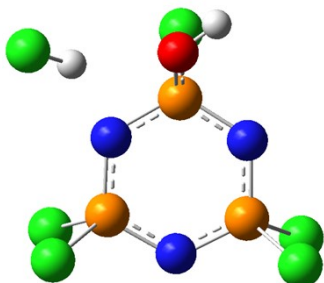

|    |             |             |             |
|----|-------------|-------------|-------------|
| P  | -0.49249100 | -1.39166600 | 0.28515000  |
| P  | 1.87961200  | -0.18489100 | -0.53278500 |
| P  | -0.24286400 | 1.37447700  | 0.41289700  |
| N  | 0.96423200  | -1.47660500 | -0.35967400 |
| N  | -1.12213900 | 0.04952700  | 0.52696100  |
| N  | 1.25389000  | 1.21631400  | -0.10953500 |
| Cl | -0.48473900 | -2.46332300 | 2.01538000  |
| Cl | -0.20270300 | 2.32521000  | 2.19920100  |
| Cl | 2.50398900  | -0.08939500 | -2.45631700 |
| Cl | 3.62297100  | -0.44162300 | 0.46357300  |
| Cl | -1.23025800 | 2.69313300  | -0.75453700 |
| Cl | -4.64974400 | -0.51564000 | -1.25173500 |
| H  | -3.46285500 | -0.77019500 | -0.82036500 |
| O  | -1.56776100 | -2.16181900 | -0.61050600 |
| H  | -1.34256600 | -3.07086300 | -0.84337300 |

Color code: P = orange, N = blue, Cl = green, O = red, H = white

**Table S85.** Cartesian coordinates (in Angstrom, Å) of the products with two hydrogen bonds (**P\_2HB**) for the hydrolysis reaction fully optimized at the B3PW91/6-311+G(d,p) level of theory.

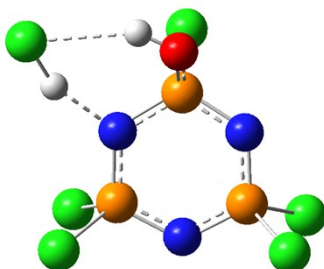

|    |             |             |             |
|----|-------------|-------------|-------------|
| P  | -0.56302600 | -1.40848000 | -0.14208000 |
| P  | 1.94009100  | -0.19151300 | -0.25316100 |
| P  | -0.32755900 | 1.36756600  | 0.26268500  |
| N  | 0.99647900  | -1.45634900 | -0.42565500 |
| N  | -1.22453800 | 0.06273200  | 0.01348600  |
| N  | 1.24299700  | 1.19516300  | 0.11744900  |
| Cl | -0.98148000 | -2.46231300 | 1.54392000  |
| Cl | -0.73721800 | 2.15377400  | 2.08307800  |
| Cl | 3.03247300  | 0.04231000  | -1.93689800 |
| Cl | 3.36133200  | -0.57683500 | 1.13283900  |
| Cl | -0.98804900 | 2.81462800  | -0.98288900 |
| Cl | -4.10679000 | -0.52951200 | -0.89157700 |
| H  | -2.97766900 | -0.02162800 | -0.41414000 |
| O  | -1.30786900 | -2.19643500 | -1.29257100 |
| H  | -2.27110000 | -2.04618900 | -1.31793300 |

Color code: P = orange, N = blue, Cl = green, O = red, H = white

**Table S86.** Cartesian coordinates (in Angstrom, Å) of the synchronous proton transfer transition state (SPT\_TS) after the hydrolysis reaction fully optimized at the B3PW91/6-311+G(d,p) level of theory.

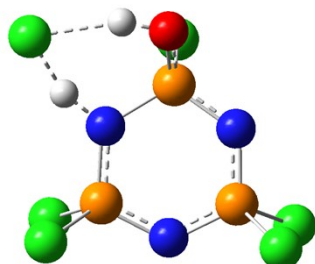

|    |             |             |             |
|----|-------------|-------------|-------------|
| P  | -0.52671500 | -1.49689300 | -0.15080800 |
| P  | 1.89619900  | -0.10884900 | -0.29127200 |
| P  | -0.43137600 | 1.35013200  | 0.33600300  |
| N  | 1.00393500  | -1.39502200 | -0.53587600 |
| N  | -1.25913900 | -0.01507300 | 0.02742500  |
| N  | 1.13330800  | 1.20478800  | 0.20732100  |
| Cl | -0.71210800 | -2.48693200 | 1.60329800  |
| Cl | -0.89587000 | 2.04386700  | 2.16857800  |
| Cl | 2.91768100  | 0.30679500  | -1.97819500 |
| Cl | 3.36570500  | -0.50389600 | 1.03387200  |
| Cl | -1.17025000 | 2.76442000  | -0.88432200 |
| Cl | -3.76823000 | -0.62542200 | -1.06928300 |
| H  | -2.41480700 | -0.07922000 | -0.35707500 |
| O  | -1.37627500 | -2.27932700 | -1.18970200 |
| H  | -2.32112900 | -1.89500300 | -1.28334600 |

Color code: P = orange, N = blue, Cl = green, O = red, H = white

**Table S87.** Cartesian coordinates (in Angstrom, Å) of the final product (P) after the HCl-catalyzed tautomerization fully optimized at the B3PW91/6-311+G(d,p) level of theory.

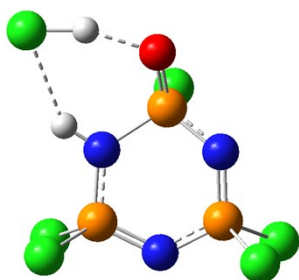

|    |             |             |             |
|----|-------------|-------------|-------------|
| P  | -0.68293200 | -1.48173100 | -0.13996200 |
| P  | 1.88001400  | -0.31322300 | -0.36433100 |
| P  | -0.21644200 | 1.45293200  | 0.29192500  |
| N  | 0.82572800  | -1.43967500 | -0.65948400 |
| N  | -1.20001900 | 0.17358800  | -0.00488400 |
| N  | 1.29812300  | 1.08546300  | 0.17937200  |
| Cl | -0.64497200 | -2.10886300 | 1.81238700  |
| Cl | -0.61671900 | 2.24142300  | 2.10215600  |
| Cl | 2.95731000  | 0.03774800  | -2.03208600 |
| Cl | 3.29060800  | -0.89930800 | 0.95959500  |
| Cl | -0.78869900 | 2.92332300  | -0.96297600 |
| Cl | -4.31133400 | -0.70073500 | -1.00075300 |
| H  | -2.20962700 | 0.31157300  | -0.09028800 |
| O  | -1.71688900 | -2.21966000 | -0.89963600 |
| H  | -3.29699300 | -1.55057100 | -1.06360900 |

Color code: P = orange, N = blue, Cl = green, O = red, H = white

**Section 5.5.2. Cartesian Coordinates for chemical species appearing in the tautomerization reaction without the interference from HCl at the B3PW91/6-311+G(d,p) level of theory**

**Table S88.** Cartesian coordinates (in Angstrom, Å) of the reactants of the tautomerization reaction without the interferences of HCl (**Tauto\_R**) fully optimized at the B3PW91/6-311+G(d,p) level of theory.

|  |    |             |             |             |
|--|----|-------------|-------------|-------------|
|  | P  | 0.03129200  | 1.68236600  | -0.57857700 |
|  | P  | -1.41679900 | -0.60319300 | 0.05631800  |
|  | P  | 1.37390900  | -0.67803500 | 0.05314800  |
|  | N  | -1.34909300 | 0.91102900  | -0.41971500 |
|  | N  | 1.37912700  | 0.83277400  | -0.44145800 |
|  | N  | -0.03973800 | -1.36681100 | 0.30278200  |
|  | Cl | 0.11496800  | 3.21672200  | 0.76183000  |
|  | Cl | 2.48625100  | -0.85846000 | 1.73935400  |
|  | Cl | -2.52902700 | -1.65324400 | -1.27112100 |
|  | Cl | -2.53480900 | -0.73619100 | 1.74052100  |
|  | Cl | 2.43688600  | -1.79314500 | -1.26427700 |
|  | O  | -0.01494400 | 2.43192600  | -1.98250400 |
|  | H  | 0.79890000  | 2.90200000  | -2.20179500 |

Color code: P = orange, N = blue, Cl = green, O = red, H = white

**Table S89.** Cartesian coordinates (in Angstrom, Å) of the tautomerization transition state without the interferences (**Tauto\_TS**) fully optimized at the B3PW91/6-311+G(d,p) of theory.

|  |    |             |             |             |
|--|----|-------------|-------------|-------------|
|  | P  | -0.16577500 | 1.73303400  | -0.67046000 |
|  | P  | -1.37592300 | -0.69081100 | 0.03901200  |
|  | P  | 1.43411100  | -0.54878200 | 0.16321600  |
|  | N  | -1.42863700 | 0.77378200  | -0.56094900 |
|  | N  | 1.32089500  | 0.95606700  | -0.41795400 |
|  | N  | 0.05320400  | -1.24617700 | 0.49488900  |
|  | Cl | -0.41835800 | 3.24398600  | 0.64283500  |
|  | Cl | 2.58085400  | -0.59988500 | 1.82440400  |
|  | Cl | -2.20592000 | -1.97537000 | -1.28451600 |
|  | Cl | -2.61270500 | -0.84786100 | 1.62875800  |
|  | Cl | 2.53002700  | -1.61715400 | -1.15965200 |
|  | O  | 0.34635500  | 2.27442200  | -2.01231200 |
|  | H  | 1.36845200  | 1.55412700  | -1.57101300 |

Color code: P = orange, N = blue, Cl = green, O = red, H = white

**Table S90.** Cartesian coordinates (in Angstrom, Å) of the product of the tautomerization reaction without the interferences (**Tauto\_P**) fully optimized at the B3PW91/6-311+G(d,p) level of theory.

|                                                                                   |    |             |             |             |
|-----------------------------------------------------------------------------------|----|-------------|-------------|-------------|
|  | P  | -0.21816800 | 1.74240200  | -0.93857400 |
|                                                                                   | P  | -1.38337900 | -0.65570100 | 0.02887900  |
|                                                                                   | P  | 1.42906100  | -0.56639800 | 0.10379900  |
|                                                                                   | N  | -1.39288600 | 0.65805600  | -0.82473900 |
|                                                                                   | N  | 1.26513400  | 0.82354000  | -0.75063900 |
|                                                                                   | N  | 0.05859500  | -1.18875700 | 0.51555400  |
|                                                                                   | Cl | -0.25150000 | 2.84027400  | 0.80810200  |
|                                                                                   | Cl | 2.58946300  | -0.26469200 | 1.72805000  |
|                                                                                   | Cl | -2.28958500 | -2.13120600 | -1.00770600 |
|                                                                                   | Cl | -2.52686500 | -0.52450500 | 1.69394500  |
|                                                                                   | Cl | 2.57341600  | -1.80251500 | -1.01311800 |
|                                                                                   | O  | -0.07856200 | 2.60966800  | -2.11364900 |
|                                                                                   | H  | 2.08611300  | 1.27321000  | -1.14122900 |

Color code: P = orange, N = blue, Cl = green, O = red, H = white

### Section 5.5.3. Cartesian Coordinates for chemical species appearing in the ring-opening reaction at the B3PW91/6-311+G(d,p) level of theory

**Table S91.** Cartesian coordinates (in Angstrom, Å) of the reactants (**R'**) for the HCl-initiated ring-opening reaction fully optimized at the B3PW91/6-311+G(d,p) level of theory.

|                                                                                     |             |             |             |             |
|-------------------------------------------------------------------------------------|-------------|-------------|-------------|-------------|
| 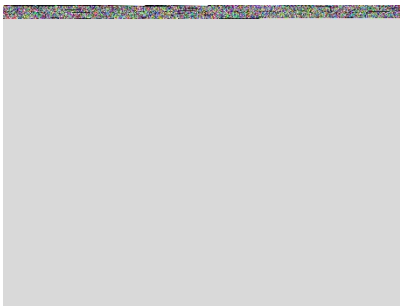 | N           | 0.00013100  | -1.24379500 | 1.35740300  |
|                                                                                     | N           | 0.00013100  | 1.11675700  | 0.00000000  |
|                                                                                     | N           | 0.00013100  | -1.24379500 | -1.35740300 |
|                                                                                     | P           | 0.00013100  | 0.34365600  | 1.40742500  |
|                                                                                     | P           | 0.00004600  | -2.07632200 | 0.00000000  |
|                                                                                     | P           | 0.00013100  | 0.34365600  | -1.40742500 |
|                                                                                     | Cl          | 1.57502500  | 0.98415600  | 2.49390400  |
|                                                                                     | Cl          | 1.57454000  | -3.34160200 | 0.00000000  |
|                                                                                     | Cl          | -1.57475600 | 0.98417700  | 2.49390400  |
|                                                                                     | Cl          | -1.57469000 | -3.34131500 | 0.00000000  |
|                                                                                     | Cl          | 1.57502500  | 0.98415600  | -2.49390400 |
|                                                                                     | Cl          | -1.57475600 | 0.98417700  | -2.49390400 |
|                                                                                     | Cl          | -0.00079800 | 4.35690300  | 0.00000000  |
| H                                                                                   | -0.00039900 | 3.04986800  | 0.00000000  |             |

Color code: P = orange, N = blue, Cl = green, H = white

**Table S92.** Cartesian coordinates (in Angstrom, Å) of the transition state (**TS1**) for the HCl-initiated ring-opening reaction fully optimized at the B3PW91/6-311+G(d,p) level of theory.

|                                                                                   |    |             |             |             |
|-----------------------------------------------------------------------------------|----|-------------|-------------|-------------|
| 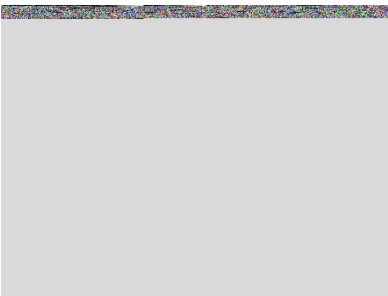 | N  | -1.92188100 | -0.14186800 | 0.00000000  |
|                                                                                   | N  | 0.44869700  | 1.18918300  | 0.00000000  |
|                                                                                   | N  | 0.44803100  | -1.40088500 | 0.00000000  |
|                                                                                   | P  | -1.21063400 | 1.24747500  | 0.00000000  |
|                                                                                   | P  | -1.10093500 | -1.53046200 | 0.00000000  |
|                                                                                   | P  | 1.48334400  | -0.16666600 | 0.00000000  |
|                                                                                   | Cl | -1.75004800 | 2.38253600  | 1.57266200  |
|                                                                                   | Cl | -1.75004800 | -2.61961400 | 1.57430400  |
|                                                                                   | Cl | -1.75004800 | 2.38253600  | -1.57266200 |
|                                                                                   | Cl | -1.75004800 | -2.61961400 | -1.57430400 |
|                                                                                   | Cl | 2.53243800  | -0.57481100 | 1.68111100  |
|                                                                                   | Cl | 2.53243800  | -0.57481100 | -1.68111100 |
|                                                                                   | Cl | 3.02760200  | 2.04521800  | 0.00000000  |
|                                                                                   | H  | 1.03057000  | 2.05530500  | 0.00000000  |

Color code: P = orange, N = blue, Cl = green, H = white

**Table S93.** Cartesian coordinates (in Angstrom, Å) of the intermediate (**Int**) for the HCl-initiated ring-opening reaction fully optimized at the B3PW91/6-311+G(d,p) level of theory.

|                                                                                     |    |             |             |             |
|-------------------------------------------------------------------------------------|----|-------------|-------------|-------------|
|  | N  | -1.88062800 | 0.46444700  | 0.16367400  |
|                                                                                     | N  | 0.77782100  | 1.08795000  | 0.07858100  |
|                                                                                     | N  | 0.06110800  | -1.31753100 | -0.31960600 |
|                                                                                     | P  | -0.80965400 | 1.59103900  | 0.07036100  |
|                                                                                     | P  | -1.43689000 | -1.08520000 | -0.02797600 |
|                                                                                     | P  | 1.45997500  | -0.50171500 | -0.08862300 |
|                                                                                     | Cl | -0.96023600 | 2.90843500  | 1.58632800  |
|                                                                                     | Cl | -2.12917600 | -2.07186300 | 1.60880200  |
|                                                                                     | Cl | -1.04867000 | 2.77239500  | -1.55494500 |
|                                                                                     | Cl | -2.57483900 | -1.86745200 | -1.50274600 |
|                                                                                     | Cl | 2.04359000  | -1.55381700 | 1.58903200  |
|                                                                                     | Cl | 2.28258600  | -1.13972000 | -1.86156800 |
|                                                                                     | Cl | 3.42214500  | 0.74520400  | 0.19648200  |
|                                                                                     | H  | 1.48863300  | 1.80998600  | 0.19150300  |

Color code: P = orange, N = blue, Cl = green, H = white

**Table S94.** Cartesian coordinates (in Angstrom, Å) of the transition state (TS2) for the HCl-initiated ring-opening reaction fully optimized at the B3PW91/6-311+G(d,p) level of theory.

|                                                                                   |    |             |             |             |
|-----------------------------------------------------------------------------------|----|-------------|-------------|-------------|
|  | N  | -1.95718600 | 0.00048700  | -0.03400100 |
|                                                                                   | N  | 0.44343900  | 1.26374700  | -0.16422400 |
|                                                                                   | N  | 0.41738600  | -1.27222500 | -0.12620400 |
|                                                                                   | P  | -1.19883000 | 1.36442600  | -0.06787300 |
|                                                                                   | P  | -1.12687100 | -1.38485100 | -0.04552100 |
|                                                                                   | P  | 1.56639800  | -0.12995900 | -0.02912200 |
|                                                                                   | Cl | -1.66919400 | 2.51761300  | 1.52822200  |
|                                                                                   | Cl | -1.71350100 | -2.44871200 | 1.57547100  |
|                                                                                   | Cl | -1.79226900 | 2.52715100  | -1.61100500 |
|                                                                                   | Cl | -1.84573100 | -2.49588000 | -1.57423500 |
|                                                                                   | Cl | 2.12371300  | -0.17263200 | 1.94416100  |
|                                                                                   | Cl | 2.92427100  | -1.41575600 | -1.00968900 |
|                                                                                   | Cl | 3.03924300  | 1.49776100  | -0.57802000 |
|                                                                                   | H  | 0.93303600  | 2.14943500  | -0.26462600 |

Color code: P = orange, N = blue, Cl = green, H = white

**Table S95.** Cartesian coordinates (in Angstrom, Å) of the products (P') for the HCl-initiated ring-opening reaction fully optimized at the B3PW91/6-311+G(d,p) level of theory.

|                                                                                     |    |             |             |             |
|-------------------------------------------------------------------------------------|----|-------------|-------------|-------------|
| 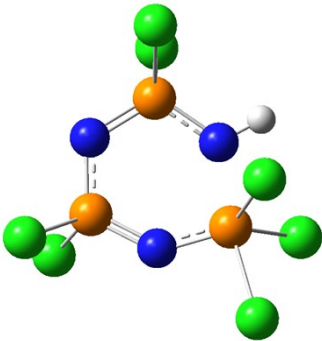 | N  | -1.75475400 | 0.65921600  | -0.26219800 |
|                                                                                     | N  | -0.11453600 | -1.32799700 | 0.41741200  |
|                                                                                     | N  | 0.92893700  | 1.03023700  | 0.03056500  |
|                                                                                     | P  | -1.60927200 | -0.88494100 | 0.00174700  |
|                                                                                     | P  | -0.51359400 | 1.64837500  | -0.06949900 |
|                                                                                     | P  | 1.56694000  | -0.42595300 | 0.08825000  |
|                                                                                     | Cl | -2.31244300 | -1.89940100 | -1.61287300 |
|                                                                                     | Cl | -0.56545400 | 2.96408100  | -1.59456200 |
|                                                                                     | Cl | -2.86850400 | -1.52795400 | 1.45640500  |
|                                                                                     | Cl | -0.83680500 | 2.82422300  | 1.54774300  |
|                                                                                     | Cl | 1.75578200  | -1.64422100 | -1.59278000 |
|                                                                                     | Cl | 3.55182100  | 0.33186100  | -0.19372100 |
|                                                                                     | Cl | 2.15318200  | -1.36000400 | 1.85473600  |
|                                                                                     | H  | 0.00254300  | -2.29837800 | 0.68794900  |

Color code: P = orange, N = blue, Cl = green, H = white

**Section 5.6 Electronic structures fully optimized at the  $\omega$ B97X-D/6-311+G(d,p) level of theory**

**Section 5.6.1. Cartesian Coordinates for the pivotal structure in the hydrolysis reaction followed by HCl-catalyzed tautomerization at the  $\omega$ B97X-D /6-311+G(d,p) level of theory**

**Table S96.** Cartesian coordinates (in Angstrom, Å) of the reactants (**R**) for the hydrolysis reaction fully optimized at the  $\omega$ B97X-D/6-311+G(d,p) level of theory.

|                                                                                   |    |             |             |             |
|-----------------------------------------------------------------------------------|----|-------------|-------------|-------------|
| 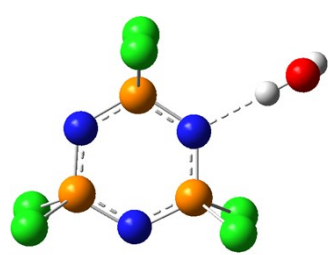 | P  | 0.61846300  | -1.36673600 | -0.01125700 |
|                                                                                   | P  | 0.51982100  | 1.43545800  | 0.00747400  |
|                                                                                   | P  | -1.84399100 | -0.05062600 | 0.01298700  |
|                                                                                   | N  | 1.32763100  | 0.06101400  | -0.00479500 |
|                                                                                   | N  | -0.96396300 | -1.36947800 | 0.00242200  |
|                                                                                   | N  | -1.05889600 | 1.32699300  | 0.02156800  |
|                                                                                   | Cl | 1.31228400  | -2.44394700 | 1.53614400  |
|                                                                                   | Cl | -3.09951800 | -0.10557700 | 1.58598800  |
|                                                                                   | Cl | 1.10292700  | 2.53711100  | -1.57616100 |
|                                                                                   | Cl | 1.13817200  | 2.53828500  | 1.56874400  |
|                                                                                   | Cl | -3.10384300 | -0.08372000 | -1.55872400 |
|                                                                                   | Cl | 1.27745600  | -2.40416300 | -1.60843600 |
|                                                                                   | H  | 4.59550600  | 0.16918600  | -0.66349000 |
|                                                                                   | O  | 4.28623000  | 0.15505600  | 0.24233300  |
|                                                                                   | H  | 3.32440800  | 0.12667700  | 0.17378900  |

Color code: P = orange, N = blue, Cl = green, O = red, H = white

**Table S97.** Cartesian coordinates (in Angstrom, Å) of the transition state (**TS**) for the hydrolysis reaction fully optimized at the  $\omega$ B97X-D/6-311+G(d,p) level of theory.

|                                                                                     |    |             |             |             |
|-------------------------------------------------------------------------------------|----|-------------|-------------|-------------|
| 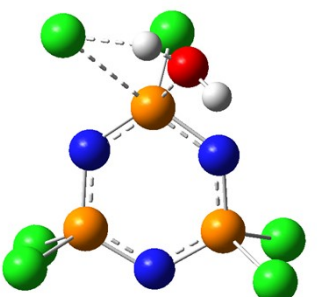 | P  | -1.21087000 | -0.82756200 | 0.07428000  |
|                                                                                     | P  | 1.63347300  | -0.72977900 | -0.14746500 |
|                                                                                     | P  | 0.22547000  | 1.61965600  | 0.10011300  |
|                                                                                     | N  | 0.24353000  | -1.47844600 | -0.21882800 |
|                                                                                     | N  | -1.07519900 | 0.73567800  | 0.30507500  |
|                                                                                     | N  | 1.60428900  | 0.85425900  | -0.07825600 |
|                                                                                     | Cl | -1.99847800 | -1.73734400 | 1.67457100  |
|                                                                                     | Cl | 0.35396400  | 2.88282200  | 1.65750900  |
|                                                                                     | Cl | 2.73030600  | -1.29212400 | -1.74799900 |
|                                                                                     | Cl | 2.73219600  | -1.44282100 | 1.39345100  |
|                                                                                     | Cl | -0.03539200 | 2.86156800  | -1.46903300 |
|                                                                                     | Cl | -3.58252700 | -0.18592800 | -0.76204400 |
|                                                                                     | H  | -2.69848500 | -1.60998400 | -1.55406100 |
|                                                                                     | O  | -1.83605100 | -2.03453700 | -1.21896000 |
|                                                                                     | H  | -1.14370200 | -2.29377800 | -1.84383100 |

Color code: P = orange, N = blue, Cl = green, O = red, H = white

**Table S98.** Cartesian coordinates (in Angstrom, Å) of the products with one hydrogen bond (**P\_1HB**) for the hydrolysis reaction fully optimized at the  $\omega$ B97X-D/6-311+G(d,p) level of theory.

|  |    |             |             |             |
|--|----|-------------|-------------|-------------|
|  | P  | -0.39072000 | -1.45979600 | 0.38286100  |
|  | P  | 1.78899100  | -0.04539200 | -0.60387100 |
|  | P  | -0.38198200 | 1.31386700  | 0.51366900  |
|  | N  | 1.01066100  | -1.40693900 | -0.36293100 |
|  | N  | -1.09396700 | -0.08715700 | 0.73046400  |
|  | N  | 1.06503100  | 1.28368500  | -0.13721500 |
|  | Cl | -0.18555300 | -2.58386000 | 2.05341500  |
|  | Cl | -0.27798500 | 2.29381500  | 2.27265400  |
|  | Cl | 2.25502600  | 0.09518900  | -2.56149100 |
|  | Cl | 3.60724500  | -0.13945100 | 0.26554000  |
|  | Cl | -1.58816900 | 2.49374800  | -0.58016200 |
|  | Cl | -4.17372100 | -0.57781700 | -1.47274200 |
|  | H  | -3.14177300 | -1.15875200 | -0.96282900 |
|  | O  | -1.45645100 | -2.28266500 | -0.47794700 |
|  | H  | -1.14938400 | -3.12485100 | -0.82835800 |

Color code: P = orange, N = blue, Cl = green, O = red, H = white

**Table S99.** Cartesian coordinates (in Angstrom, Å) of the hydrogen bond configuration change transition state (**TS\_HB**) for the hydrolysis reaction fully optimized at the  $\omega$ B97X-D/6-311+G(d,p) level of theory.

|  |    |             |             |             |
|--|----|-------------|-------------|-------------|
|  | P  | -0.36832500 | -1.48727400 | 0.30415900  |
|  | P  | 1.81019600  | -0.00457300 | -0.57910700 |
|  | P  | -0.41059900 | 1.28051900  | 0.52844500  |
|  | N  | 1.04972900  | -1.38589300 | -0.40394000 |
|  | N  | -1.11104700 | -0.13693500 | 0.66250800  |
|  | N  | 1.05426200  | 1.29525200  | -0.08148900 |
|  | Cl | -0.17628700 | -2.64208700 | 1.95624500  |
|  | Cl | -0.36768600 | 2.18524700  | 2.33018600  |
|  | Cl | 2.31634000  | 0.21361100  | -2.51974000 |
|  | Cl | 3.61025400  | -0.10018300 | 0.32677700  |
|  | Cl | -1.60163600 | 2.49200400  | -0.54674500 |
|  | Cl | -4.19370900 | -0.53456700 | -1.45049300 |
|  | H  | -3.13865600 | -1.07665500 | -0.94781000 |
|  | O  | -1.39887600 | -2.30765100 | -0.59641200 |
|  | H  | -1.07369500 | -3.13762000 | -0.95881800 |

Color code: P = orange, N = blue, Cl = green, O = red, H = white

**Table S100.** Cartesian coordinates (in Angstrom, Å) of the products with two hydrogen bonds (**P\_2HB**) for the hydrolysis reaction fully optimized at the  $\omega$ B97X-D/6-311+G(d,p) level of theory.

|                                                                                   |             |             |             |             |
|-----------------------------------------------------------------------------------|-------------|-------------|-------------|-------------|
|  | P           | -0.55701200 | -1.40023800 | -0.16347600 |
|                                                                                   | P           | 1.94720000  | -0.19234300 | -0.24802000 |
|                                                                                   | P           | -0.31668500 | 1.36654300  | 0.24588800  |
|                                                                                   | N           | 0.99964400  | -1.44544600 | -0.42626100 |
|                                                                                   | N           | -1.20407900 | 0.06445000  | 0.00846600  |
|                                                                                   | N           | 1.24601200  | 1.19236200  | 0.09000600  |
|                                                                                   | Cl          | -1.00128700 | -2.46360700 | 1.50238300  |
|                                                                                   | Cl          | -0.71953500 | 2.14484100  | 2.06399800  |
|                                                                                   | Cl          | 3.07148500  | 0.02245500  | -1.90388500 |
|                                                                                   | Cl          | 3.32563100  | -0.57528800 | 1.17305200  |
|                                                                                   | Cl          | -0.98238700 | 2.80514200  | -0.99622700 |
|                                                                                   | Cl          | -4.15401200 | -0.51179300 | -0.83186300 |
|                                                                                   | H           | -3.02908200 | -0.00068300 | -0.37921500 |
|                                                                                   | O           | -1.28659500 | -2.17411700 | -1.32767300 |
| H                                                                                 | -2.24996200 | -2.06510400 | -1.34755300 |             |

Color code: P = orange, N = blue, Cl = green, O = red, H = white

**Table S101.** Cartesian coordinates (in Angstrom, Å) of the synchronous proton transfer transition state (**SPT\_TS**) after the hydrolysis reaction fully optimized at the  $\omega$ B97X-D/6-311+G(d,p) level of theory.

|                                                                                     |             |             |             |             |
|-------------------------------------------------------------------------------------|-------------|-------------|-------------|-------------|
| 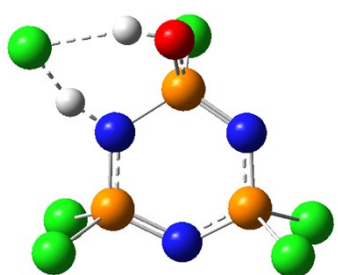 | P           | -0.51628400 | -1.49224800 | -0.17783600 |
|                                                                                     | P           | 1.90436100  | -0.10333100 | -0.27806600 |
|                                                                                     | P           | -0.42860500 | 1.34933700  | 0.32283400  |
|                                                                                     | N           | 1.01355100  | -1.38186500 | -0.52850300 |
|                                                                                     | N           | -1.24256400 | -0.01823100 | 0.01614600  |
|                                                                                     | N           | 1.12857600  | 1.20371600  | 0.19330600  |
|                                                                                     | Cl          | -0.74213200 | -2.50143800 | 1.55149500  |
|                                                                                     | Cl          | -0.90400000 | 2.02511600  | 2.15076400  |
|                                                                                     | Cl          | 2.95249800  | 0.30507000  | -1.94098100 |
|                                                                                     | Cl          | 3.33559700  | -0.49912900 | 1.07799100  |
|                                                                                     | Cl          | -1.16967300 | 2.75091300  | -0.89737600 |
|                                                                                     | Cl          | -3.78440700 | -0.60158600 | -1.00910800 |
|                                                                                     | H           | -2.39504800 | -0.07501000 | -0.32959300 |
|                                                                                     | O           | -1.33802500 | -2.25936200 | -1.24646600 |
| H                                                                                   | -2.28378100 | -1.92390700 | -1.32665900 |             |

Color code: P = orange, N = blue, Cl = green, O = red, H = white

**Table S102.** Cartesian coordinates (in Angstrom, Å) of the final product (**P**) after the HCl-catalyzed tautomerization fully optimized at the  $\omega$ B97X-D/6-311+G(d,p) level of theory.

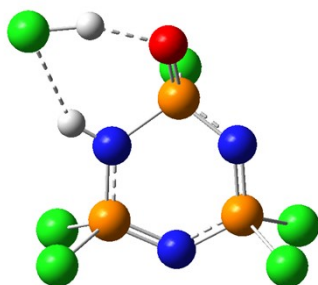

|    |             |             |             |
|----|-------------|-------------|-------------|
| P  | -0.66357700 | -1.48643100 | -0.15962400 |
| P  | 1.88491400  | -0.29343700 | -0.36713800 |
| P  | -0.22923700 | 1.43984000  | 0.29031300  |
| N  | 0.84214100  | -1.41965700 | -0.66626100 |
| N  | -1.19503700 | 0.15632700  | -0.01878000 |
| N  | 1.28231800  | 1.09316100  | 0.16518300  |
| Cl | -0.61893100 | -2.10165700 | 1.79215000  |
| Cl | -0.64122600 | 2.18638100  | 2.10816000  |
| Cl | 2.97153500  | 0.06990300  | -2.01783100 |
| Cl | 3.27611200  | -0.87186100 | 0.97088200  |
| Cl | -0.82108400 | 2.91160200  | -0.94115200 |
| Cl | -4.30685000 | -0.69658000 | -0.99064700 |
| H  | -2.20438600 | 0.28686300  | -0.09330100 |
| O  | -1.68421800 | -2.23648000 | -0.91295400 |
| H  | -3.32180300 | -1.56581400 | -1.08389000 |

Color code: P = orange, N = blue, Cl = green, O = red, H = white

### Section 5.6.2. Cartesian Coordinates for chemical species appearing in the tautomerization reaction without the interference from HCl at the $\omega$ B97X-D/6-311+G(d,p) level of theory

**Table S103.** Cartesian coordinates (in Angstrom, Å) of the reactants of the tautomerization reaction without the interferences of HCl (**Tauto\_R**) fully optimized at the  $\omega$ B97X-D/6-311+G(d,p) level of theory.

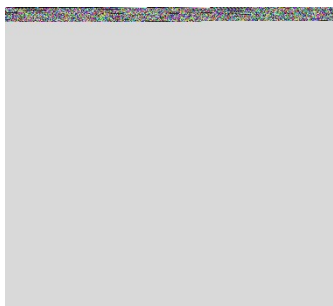

|    |             |             |             |
|----|-------------|-------------|-------------|
| P  | 0.03341800  | 1.67291900  | -0.60433200 |
| P  | -1.41634300 | -0.60028800 | 0.05082600  |
| P  | 1.37153900  | -0.67753700 | 0.05104400  |
| N  | -1.33783400 | 0.89667000  | -0.45524100 |
| N  | 1.37017900  | 0.81675000  | -0.47301200 |
| N  | -0.04111100 | -1.35162100 | 0.30121000  |
| Cl | 0.11038000  | 3.17590500  | 0.76048600  |
| Cl | 2.46354600  | -0.81391800 | 1.74581300  |
| Cl | -2.53099300 | -1.67040000 | -1.24500600 |
| Cl | -2.51574300 | -0.69054900 | 1.74183700  |
| Cl | 2.43717900  | -1.81365000 | -1.23217700 |
| O  | 0.00031200  | 2.43810400  | -1.99310700 |
| H  | 0.83539300  | 2.85055400  | -2.23513100 |

Color code: P = orange, N = blue, Cl = green, O = red, H = white

**Table S104.** Cartesian coordinates (in Angstrom, Å) of the tautomerization transition state without the interferences (**Tauto\_TS**) fully optimized at the  $\omega$ B97X-D/6-311+G(d,p) of theory.

|                                                                                   |    |             |             |             |
|-----------------------------------------------------------------------------------|----|-------------|-------------|-------------|
|  | P  | -0.15242600 | 1.72077700  | -0.69029200 |
|                                                                                   | P  | -1.37654600 | -0.68268000 | 0.03822900  |
|                                                                                   | P  | 1.42695800  | -0.55154000 | 0.16959700  |
|                                                                                   | N  | -1.40899500 | 0.76284300  | -0.59052300 |
|                                                                                   | N  | 1.31840900  | 0.94157900  | -0.42314700 |
|                                                                                   | N  | 0.04525300  | -1.22922500 | 0.50356100  |
|                                                                                   | Cl | -0.40642300 | 3.21736500  | 0.63158200  |
|                                                                                   | Cl | 2.57076900  | -0.58247800 | 1.82311900  |
|                                                                                   | Cl | -2.20233900 | -1.98646200 | -1.25745500 |
|                                                                                   | Cl | -2.61317500 | -0.79115500 | 1.62382600  |
|                                                                                   | Cl | 2.50534700  | -1.63799200 | -1.14163700 |
|                                                                                   | O  | 0.36829200  | 2.26308000  | -2.02090800 |
|                                                                                   | H  | 1.38018300  | 1.54289600  | -1.57536700 |

Color code: P = orange, N = blue, Cl = green, O = red, H = white

**Table S105.** Cartesian coordinates (in Angstrom, Å) of the product of the tautomerization reaction without the interferences (**Tauto\_P**) fully optimized at the  $\omega$ B97X-D/6-311+G(d,p) level of theory.

|                                                                                     |    |             |             |             |
|-------------------------------------------------------------------------------------|----|-------------|-------------|-------------|
|  | P  | -0.18585000 | 1.72968500  | -0.95072200 |
|                                                                                     | P  | -1.39364500 | -0.63416900 | 0.02745500  |
|                                                                                     | P  | 1.41381300  | -0.58782700 | 0.10215600  |
|                                                                                     | N  | -1.37248900 | 0.66881800  | -0.83034100 |
|                                                                                     | N  | 1.27413500  | 0.78976600  | -0.76812300 |
|                                                                                     | N  | 0.03708800  | -1.18449100 | 0.50570900  |
|                                                                                     | Cl | -0.19159100 | 2.81061200  | 0.80110900  |
|                                                                                     | Cl | 2.56045400  | -0.26700600 | 1.72311100  |
|                                                                                     | Cl | -2.32681700 | -2.09726200 | -0.98881900 |
|                                                                                     | Cl | -2.52129900 | -0.45676700 | 1.69039200  |
|                                                                                     | Cl | 2.54398500  | -1.84656000 | -0.98771800 |
|                                                                                     | O  | -0.03587600 | 2.60165300  | -2.11468900 |
|                                                                                     | H  | 2.10065900  | 1.22149700  | -1.16385000 |

Color code: P = orange, N = blue, Cl = green, O = red, H = white

**Section 5.6.3. Cartesian Coordinates for chemical species appearing in the ring-opening reaction at the  $\omega$ B97X-D/6-311+G(d,p) level of theory**

**Table S106.** Cartesian coordinates (in Angstrom, Å) of the reactants (**R'**) for the HCl-initiated ring-opening reaction fully optimized at the  $\omega$ B97X-D/6-311+G(d,p) level of theory.

|  |    |             |             |             |
|--|----|-------------|-------------|-------------|
|  | N  | -0.00009900 | 1.23827400  | 1.34840100  |
|  | N  | -0.00007900 | -1.10146400 | 0.00000000  |
|  | N  | -0.00009900 | 1.23827400  | -1.34840100 |
|  | P  | -0.00009900 | -0.34199300 | 1.40489400  |
|  | P  | -0.00005100 | 2.07295300  | 0.00000000  |
|  | P  | -0.00009900 | -0.34199300 | -1.40489400 |
|  | Cl | -1.57230600 | -0.98530400 | 2.48104700  |
|  | Cl | -1.57267700 | 3.32953100  | 0.00000000  |
|  | Cl | 1.57207800  | -0.98532100 | 2.48107900  |
|  | Cl | 1.57271500  | 3.32936200  | 0.00000000  |
|  | Cl | -1.57230600 | -0.98530400 | -2.48104700 |
|  | Cl | 1.57207800  | -0.98532100 | -2.48107900 |
|  | Cl | 0.00073100  | -4.33131800 | 0.00000000  |
|  | H  | 0.00036700  | -3.02763600 | 0.00000000  |

Color code: P = orange, N = blue, Cl = green, H = white

**Table S107.** Cartesian coordinates (in Angstrom, Å) of the transition state (**TS1**) for the HCl-initiated ring-opening reaction fully optimized at the  $\omega$ B97X-D/6-311+G(d,p) level of theory.

|  |    |             |             |             |
|--|----|-------------|-------------|-------------|
|  | N  | -1.74061700 | 0.80015100  | 0.00006000  |
|  | N  | 0.96317600  | 0.82645300  | 0.00006100  |
|  | N  | -0.28199300 | -1.42680500 | 0.00019900  |
|  | P  | -0.45761700 | 1.67532100  | 0.00022900  |
|  | P  | -1.69923600 | -0.80585600 | -0.00001800 |
|  | P  | 1.21780900  | -0.85389400 | -0.00003900 |
|  | Cl | -0.37726600 | 2.91961000  | 1.57053500  |
|  | Cl | -2.78498000 | -1.44326400 | 1.57211700  |
|  | Cl | -0.37723100 | 2.92018200  | -1.56961100 |
|  | Cl | -2.78452400 | -1.44306400 | -1.57257000 |
|  | Cl | 1.92211200  | -1.70834800 | 1.68428500  |
|  | Cl | 1.92159500  | -1.70817300 | -1.68468000 |
|  | Cl | 3.63500100  | 0.28934400  | -0.00035700 |
|  | H  | 1.87167700  | 1.32097000  | -0.00004100 |

Color code: P = orange, N = blue, Cl = green, H = white

**Table S108.** Cartesian coordinates (in Angstrom, Å) of the intermediate (**Int**) for the HCl-initiated ring-opening reaction fully optimized at the  $\omega$ B97X-D/6-311+G(d,p) level of theory.

|  |    |             |             |             |
|--|----|-------------|-------------|-------------|
|  | N  | 1.85863700  | 0.46161900  | -0.26226400 |
|  | N  | -0.78477600 | 1.08671000  | -0.12603900 |
|  | N  | -0.04865800 | -1.27641700 | 0.37862600  |
|  | P  | 0.79911100  | 1.58505400  | -0.11500200 |
|  | P  | 1.43312100  | -1.07261500 | 0.02087700  |
|  | P  | -1.45398800 | -0.49012800 | 0.10793600  |
|  | Cl | 0.92954200  | 2.94225200  | -1.58341000 |
|  | Cl | 2.05708500  | -2.13057000 | -1.58849600 |
|  | Cl | 1.05120300  | 2.69745000  | 1.54872400  |
|  | Cl | 2.61641700  | -1.78250800 | 1.48763500  |
|  | Cl | -1.99936000 | -1.61225300 | -1.52955900 |
|  | Cl | -2.25776200 | -1.04396400 | 1.90918700  |
|  | Cl | -3.41851000 | 0.69155600  | -0.23669100 |
|  | H  | -1.48651100 | 1.80859700  | -0.26504500 |

Color code: P = orange, N = blue, Cl = green, H = white

**Table S109.** Cartesian coordinates (in Angstrom, Å) of the transition state (**TS2**) for the HCl-initiated ring-opening reaction fully optimized at the  $\omega$ B97X-D/6-311+G(d,p) level of theory.

|  |    |             |             |             |
|--|----|-------------|-------------|-------------|
|  | N  | -1.94452000 | 0.01096200  | -0.03307200 |
|  | N  | 0.44899100  | 1.25635900  | -0.22745200 |
|  | N  | 0.40398000  | -1.26039500 | -0.18603700 |
|  | P  | -1.18503900 | 1.36577100  | -0.07933700 |
|  | P  | -1.12980700 | -1.37594400 | -0.05476900 |
|  | P  | 1.55752600  | -0.13283000 | -0.05846000 |
|  | Cl | -1.58455200 | 2.49983600  | 1.54004200  |
|  | Cl | -1.66526500 | -2.40812800 | 1.59662900  |
|  | Cl | -1.81013000 | 2.54110000  | -1.58842800 |
|  | Cl | -1.89258300 | -2.49708500 | -1.54325800 |
|  | Cl | 2.04423800  | -0.17056200 | 1.92858100  |
|  | Cl | 2.92155900  | -1.43026100 | -0.99335600 |
|  | Cl | 3.04957200  | 1.46236300  | -0.56734400 |
|  | H  | 0.93239200  | 2.14307600  | -0.32431600 |

Color code: P = orange, N = blue, Cl = green, H = white

**Table S110.** Cartesian coordinates (in Angstrom, Å) of the products (**P'**) for the HCl-initiated ring-opening reaction fully optimized at the  $\omega$ B97X-D/6-311+G(d,p) level of theory.

|                                                                                   |    |             |             |             |
|-----------------------------------------------------------------------------------|----|-------------|-------------|-------------|
| 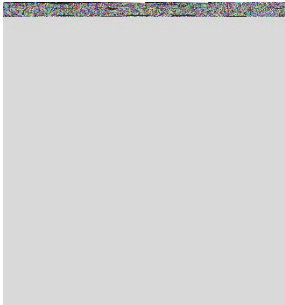 | N  | -1.73763300 | 0.64762500  | -0.27812100 |
|                                                                                   | N  | -0.10906600 | -1.32696000 | 0.42525200  |
|                                                                                   | N  | 0.91443500  | 1.02485500  | 0.07008000  |
|                                                                                   | P  | -1.59686000 | -0.88739300 | -0.00419700 |
|                                                                                   | P  | -0.51451800 | 1.64558400  | -0.06584900 |
|                                                                                   | P  | 1.55582100  | -0.42395100 | 0.10277400  |
|                                                                                   | Cl | -2.26680500 | -1.91623000 | -1.61229800 |
|                                                                                   | Cl | -0.54121900 | 2.95045500  | -1.59281700 |
|                                                                                   | Cl | -2.85879900 | -1.52077700 | 1.44046900  |
|                                                                                   | Cl | -0.87818300 | 2.81342000  | 1.53909300  |
|                                                                                   | Cl | 1.73023900  | -1.59883100 | -1.60096300 |
|                                                                                   | Cl | 3.53314200  | 0.33427800  | -0.18351500 |
|                                                                                   | Cl | 2.15551600  | -1.36460600 | 1.85009800  |
|                                                                                   | H  | 0.00306200  | -2.29329100 | 0.70744000  |

Color code: P = orange, N = blue, Cl = green, H = white

## Section 5.7 Electronic structures fully optimized at the M06-2X/6-311+G(d,p) level of theory

### Section 5.7.1. Cartesian Coordinates for the pivotal structure in the hydrolysis reaction followed by HCl-catalyzed tautomerization at the M06-2X/6-311+G(d,p) level of theory

**Table S111.** Cartesian coordinates (in Angstrom, Å) of the reactants (**R**) for the hydrolysis reaction fully optimized at the M06-2X/6-311+G(d,p) level of theory.

|                                                                                     |    |             |             |             |
|-------------------------------------------------------------------------------------|----|-------------|-------------|-------------|
| 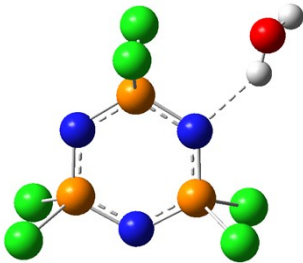 | P  | 0.49804000  | -1.54725600 | -0.03798300 |
|                                                                                     | P  | 0.67593400  | 1.25292800  | 0.05438300  |
|                                                                                     | P  | -1.82445400 | -0.00436600 | 0.01944200  |
|                                                                                     | N  | 1.34510200  | -0.19915400 | -0.01172100 |
|                                                                                     | N  | -1.08105400 | -1.40897800 | -0.02593400 |
|                                                                                     | N  | -0.91136400 | 1.29059700  | 0.07806500  |
|                                                                                     | Cl | 1.07952900  | -2.71546300 | 1.49541400  |
|                                                                                     | Cl | -3.09990400 | 0.01300400  | 1.57580500  |
|                                                                                     | Cl | 1.33807300  | 2.34016500  | -1.50313300 |
|                                                                                     | Cl | 1.38967000  | 2.24433200  | 1.64057700  |
|                                                                                     | Cl | -3.06802100 | 0.12953700  | -1.56002800 |
|                                                                                     | Cl | 1.06175600  | -2.63248800 | -1.64044700 |
|                                                                                     | H  | 4.59612300  | 0.78159000  | -0.60973100 |
|                                                                                     | O  | 4.06121100  | 0.82284800  | 0.18505000  |
|                                                                                     | H  | 3.37204700  | 0.15823700  | 0.06882300  |

Color code: P = orange, N = blue, Cl = green, O = red, H = white

**Table S112.** Cartesian coordinates (in Angstrom, Å) of the transition state (TS\*) for the hydrolysis reaction fully optimized at the M06-2X/6-311+G(d,p) level of theory.

|  |    |             |             |             |
|--|----|-------------|-------------|-------------|
|  | P  | -1.27362700 | -0.72850500 | -0.08767600 |
|  | P  | 1.58437400  | -0.79549200 | -0.09953400 |
|  | P  | 0.28145300  | 1.62433500  | 0.11364400  |
|  | N  | 0.17271500  | -1.45454500 | -0.32170800 |
|  | N  | -1.10392600 | 0.83553300  | 0.08022600  |
|  | N  | 1.62703900  | 0.78415900  | 0.09260200  |
|  | Cl | -1.95510800 | -1.79790300 | 1.49433700  |
|  | Cl | 0.27335600  | 2.81757400  | 1.73007700  |
|  | Cl | 2.78786800  | -1.30605100 | -1.64179800 |
|  | Cl | 2.54278900  | -1.65061400 | 1.46448400  |
|  | Cl | 0.29660000  | 2.94678900  | -1.40954800 |
|  | Cl | -3.68074100 | -0.23012700 | -0.52547200 |
|  | H  | -2.78338700 | -1.46897400 | -1.71462300 |
|  | O  | -1.77736100 | -1.51796600 | -1.64521700 |
|  | H  | -1.25247100 | -2.30277200 | -1.88334800 |

Color code: P = orange, N = blue, Cl = green, O = red, H = white

**Table S113.** Cartesian coordinates (in Angstrom, Å) of the products with one hydrogen bond (P\_1HB\*) for the hydrolysis reaction fully optimized at the M06-2X/6-311+G(d,p) level of theory.

|  |    |             |             |             |
|--|----|-------------|-------------|-------------|
|  | P  | 0.16009700  | 1.51987400  | -0.56118300 |
|  | P  | -2.01082900 | -0.14711400 | -0.06190500 |
|  | P  | 0.59069000  | -1.15466600 | 0.11023300  |
|  | N  | -1.40287300 | 1.22606800  | -0.57547600 |
|  | N  | 1.12388400  | 0.25902900  | -0.40881600 |
|  | N  | -0.98185100 | -1.32305800 | 0.22573800  |
|  | Cl | 0.55475700  | 2.83942600  | 0.93014400  |
|  | Cl | 1.43837400  | -1.56191800 | 1.89083300  |
|  | Cl | -3.39040100 | -0.77745900 | -1.38075700 |
|  | Cl | -3.11398100 | 0.16757300  | 1.59856800  |
|  | Cl | 1.34985800  | -2.58394200 | -1.07486400 |
|  | Cl | 4.33826900  | 0.38427400  | -0.16083600 |
|  | H  | 3.05327300  | 0.43973700  | -0.34847800 |
|  | O  | 0.61681500  | 2.28675500  | -1.86519500 |
|  | H  | 0.11935200  | 3.08855400  | -2.06870700 |

Color code: P = orange, N = blue, Cl = green, O = red, H = white

**Table S114.** Cartesian coordinates (in Angstrom, Å) of the hydrogen bond configuration change transition state (**TS\_HB**) for the hydrolysis reaction fully optimized at the M06-2X/6-311+G(d,p) level of theory.

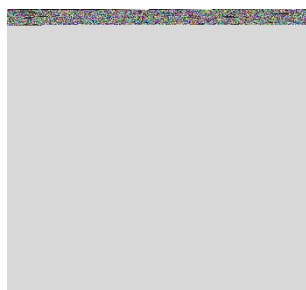

|    |             |             |             |
|----|-------------|-------------|-------------|
| P  | -0.52977200 | -1.33588800 | -0.45731900 |
| P  | 1.98654400  | -0.20825100 | -0.11865100 |
| P  | -0.28374600 | 1.38399900  | 0.13299200  |
| N  | 1.05524800  | -1.41405800 | -0.57763600 |
| N  | -1.16448500 | 0.13059000  | -0.32703200 |
| N  | 1.29399000  | 1.19559900  | 0.18757700  |
| Cl | -1.13294800 | -2.46873700 | 1.12127100  |
| Cl | -0.93259300 | 2.02127300  | 1.93262600  |
| Cl | 3.41065500  | 0.05532100  | -1.51083600 |
| Cl | 3.05698000  | -0.75445900 | 1.50306000  |
| Cl | -0.73974200 | 2.92871200  | -1.06652000 |
| Cl | -4.32890400 | -0.47144200 | -0.38586600 |
| H  | -3.11198400 | -0.01222700 | -0.38463400 |
| O  | -1.23329900 | -2.04006200 | -1.68766400 |
| H  | -1.57891200 | -2.93143300 | -1.54324800 |

Color code: P = orange, N = blue, Cl = green, O = red, H = white

**Table S115.** Cartesian coordinates (in Angstrom, Å) of the products with two hydrogen bonds (**P\_2HB**) for the hydrolysis reaction fully optimized at the M06-2X/6-311+G(d,p) level of theory.

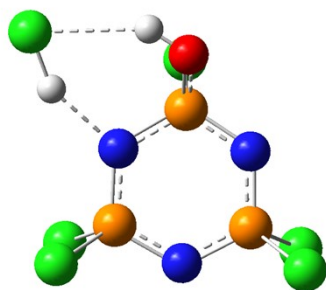

|    |             |             |             |
|----|-------------|-------------|-------------|
| P  | -0.60505900 | -1.34907700 | -0.23693600 |
| P  | 1.94239900  | -0.24671800 | -0.24163000 |
| P  | -0.27177400 | 1.40113100  | 0.17976200  |
| N  | 0.95072800  | -1.45370700 | -0.50560600 |
| N  | -1.20578500 | 0.14244100  | -0.11674100 |
| N  | 1.28982700  | 1.17661500  | 0.04319300  |
| Cl | -1.07564400 | -2.32279700 | 1.47927200  |
| Cl | -0.67857400 | 2.12999500  | 2.01881300  |
| Cl | 3.20828400  | -0.09214300 | -1.79297000 |
| Cl | 3.17864100  | -0.70055700 | 1.28771900  |
| Cl | -0.85772900 | 2.90772100  | -1.01511700 |
| Cl | -4.18102700 | -0.56540300 | -0.73436800 |
| H  | -3.07871900 | 0.05436300  | -0.39009500 |
| O  | -1.36411000 | -2.14948600 | -1.35856600 |
| H  | -2.33244800 | -2.06182000 | -1.34216300 |

Color code: P = orange, N = blue, Cl = green, O = red, H = white

**Table S116.** Cartesian coordinates (in Angstrom, Å) of the synchronous proton transfer transition state (SPT\_TS) after the hydrolysis reaction fully optimized at the M06-2X/6-311+G(d,p) level of theory.

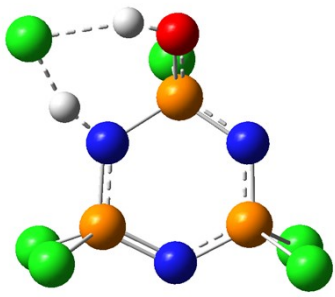

|    |             |             |             |
|----|-------------|-------------|-------------|
| P  | -0.52004800 | -1.48385900 | -0.20851200 |
| P  | 1.89684300  | -0.10545200 | -0.29904100 |
| P  | -0.43279200 | 1.35824800  | 0.30688100  |
| N  | 0.99622100  | -1.36376900 | -0.62478100 |
| N  | -1.24986400 | -0.00317800 | -0.03048100 |
| N  | 1.12632100  | 1.20565600  | 0.18267300  |
| Cl | -0.65807200 | -2.41474700 | 1.57506500  |
| Cl | -0.91399900 | 2.00271300  | 2.14277600  |
| Cl | 3.01324500  | 0.32913200  | -1.90485600 |
| Cl | 3.26941000  | -0.55814800 | 1.09949400  |
| Cl | -1.16848300 | 2.78141500  | -0.88782900 |
| Cl | -3.80376100 | -0.67525300 | -0.99175700 |
| H  | -2.39150600 | -0.06764700 | -0.34208700 |
| O  | -1.38575200 | -2.28815800 | -1.20333800 |
| H  | -2.34303000 | -1.93901100 | -1.27217700 |

Color code: P = orange, N = blue, Cl = green, O = red, H = white

**Table S117.** Cartesian coordinates (in Angstrom, Å) of the final product (P) after the HCl-catalyzed tautomerization fully optimized at the M06-2X/6-311+G(d,p) level of theory.

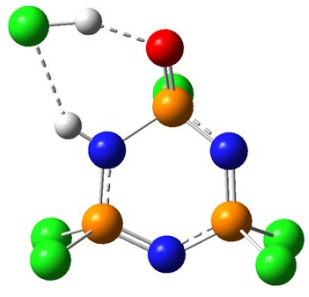

|    |             |             |             |
|----|-------------|-------------|-------------|
| P  | -0.65932300 | -1.47287600 | -0.21587800 |
| P  | 1.88869600  | -0.30282100 | -0.35448100 |
| P  | -0.23621600 | 1.44086400  | 0.25192400  |
| N  | 0.84771700  | -1.41377400 | -0.72897600 |
| N  | -1.19848900 | 0.17459800  | -0.13643800 |
| N  | 1.27980100  | 1.08883100  | 0.16637600  |
| Cl | -0.59706600 | -1.98398400 | 1.76890100  |
| Cl | -0.70730400 | 2.12851700  | 2.07800300  |
| Cl | 3.06575300  | 0.06569700  | -1.93668300 |
| Cl | 3.19949700  | -0.91879200 | 1.04545900  |
| Cl | -0.77670500 | 2.95806300  | -0.94399300 |
| Cl | -4.32534300 | -0.74892900 | -0.93265800 |
| H  | -2.20996300 | 0.30360400  | -0.21217900 |
| O  | -1.67734000 | -2.26256900 | -0.92507800 |
| H  | -3.37202800 | -1.63788100 | -1.06089300 |

Color code: P = orange, N = blue, Cl = green, O = red, H = white

**Section 5.7.2. Cartesian Coordinates for chemical species appearing in the tautomerization reaction without the interference from HCl at the M06-2X/6-311+G(d,p) level of theory**

**Table S118.** Cartesian coordinates (in Angstrom, Å) of the reactants of the tautomerization reaction without the interferences of HCl (**Tauto\_R**) fully optimized at the M06-2X/6-311+G(d,p) level of theory.

|  |    |             |             |             |
|--|----|-------------|-------------|-------------|
|  | P  | 0.03044600  | 1.65608900  | -0.65833900 |
|  | P  | -1.41632100 | -0.60147500 | 0.03409100  |
|  | P  | 1.37344300  | -0.67422400 | 0.03636000  |
|  | N  | -1.34294400 | 0.87215000  | -0.54552200 |
|  | N  | 1.37124600  | 0.79696400  | -0.55765900 |
|  | N  | -0.03922800 | -1.35344100 | 0.29210000  |
|  | Cl | 0.09973000  | 3.09851900  | 0.77322400  |
|  | Cl | 2.43322900  | -0.72152400 | 1.75626700  |
|  | Cl | -2.56474100 | -1.71986200 | -1.18232800 |
|  | Cl | -2.47902300 | -0.60586200 | 1.75092800  |
|  | Cl | 2.47338600  | -1.85454200 | -1.16872300 |
|  | O  | 0.00651700  | 2.48018500  | -2.00874200 |
|  | H  | 0.84694100  | 2.89857000  | -2.23344000 |

Color code: P = orange, N = blue, Cl = green, O = red, H = white

**Table S119.** Cartesian coordinates (in Angstrom, Å) of the tautomerization transition state without the interferences (**Tauto\_TS**) fully optimized at the M06-2X/6-311+G(d,p) of theory.

|  |    |             |             |             |
|--|----|-------------|-------------|-------------|
|  | P  | -0.19985600 | 1.70728500  | -0.72675600 |
|  | P  | -1.35128900 | -0.71653500 | 0.03212000  |
|  | P  | 1.44622800  | -0.50004800 | 0.18182900  |
|  | N  | -1.41684100 | 0.69159600  | -0.68060800 |
|  | N  | 1.29819800  | 0.98211400  | -0.43317100 |
|  | N  | 0.07984300  | -1.19954500 | 0.54762900  |
|  | Cl | -0.53968500 | 3.15417900  | 0.63148200  |
|  | Cl | 2.61025500  | -0.48197700 | 1.81746000  |
|  | Cl | -2.12296300 | -2.10705000 | -1.20113100 |
|  | Cl | -2.60435100 | -0.77959400 | 1.60569900  |
|  | Cl | 2.53026900  | -1.59075700 | -1.12123100 |
|  | O  | 0.32849200  | 2.30065400  | -2.02794100 |
|  | H  | 1.36747100  | 1.60345800  | -1.57005200 |

Color code: P = orange, N = blue, Cl = green, O = red, H = white

**Table S120.** Cartesian coordinates (in Angstrom, Å) of the product of the tautomerization reaction without the interferences (**Tauto\_P**) fully optimized at the M06-2X/6-311+G(d,p) level of theory.

|                                                                                   |    |             |             |             |
|-----------------------------------------------------------------------------------|----|-------------|-------------|-------------|
|  | P  | -0.17884600 | 1.71017200  | -0.98421900 |
|                                                                                   | P  | -1.39956600 | -0.61964100 | 0.01577000  |
|                                                                                   | P  | 1.41177800  | -0.58903700 | 0.09071900  |
|                                                                                   | N  | -1.37283400 | 0.65076800  | -0.89684300 |
|                                                                                   | N  | 1.27672600  | 0.75268700  | -0.83701400 |
|                                                                                   | N  | 0.02952400  | -1.17536700 | 0.50150900  |
|                                                                                   | Cl | -0.16469700 | 2.70848800  | 0.81812700  |
|                                                                                   | Cl | 2.53769900  | -0.20083200 | 1.71029600  |
|                                                                                   | Cl | -2.36536400 | -2.10375900 | -0.93067700 |
|                                                                                   | Cl | -2.50461500 | -0.36234300 | 1.68235700  |
|                                                                                   | Cl | 2.55895400  | -1.88334200 | -0.93257700 |
|                                                                                   | O  | -0.02443000 | 2.62619000  | -2.11023500 |
|                                                                                   | H  | 2.10744200  | 1.18185700  | -1.23366400 |

Color code: P = orange, N = blue, Cl = green, O = red, H = white

### Section 5.7.3. Cartesian Coordinates for chemical species appearing in the ring-opening reaction at the M06-2X/6-311+G(d,p) level of theory

**Table S121.** Cartesian coordinates (in Angstrom, Å) of the reactants (**R'**) for the HCl-initiated ring-opening reaction fully optimized at the M06-2X/6-311+G(d,p) level of theory.

|                                                                                     |             |             |             |             |
|-------------------------------------------------------------------------------------|-------------|-------------|-------------|-------------|
| 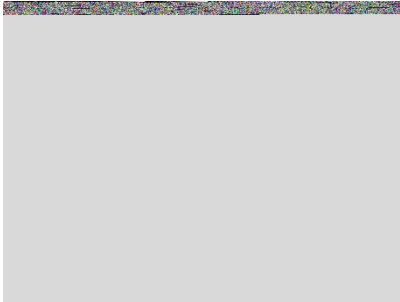 | N           | 0.00046500  | 1.24130800  | 1.35329100  |
|                                                                                     | N           | -0.00049300 | -1.10276500 | -0.00000200 |
|                                                                                     | N           | 0.00046400  | 1.24131000  | -1.35329200 |
|                                                                                     | P           | -0.00011200 | -0.34196400 | 1.40636500  |
|                                                                                     | P           | 0.00082700  | 2.07393200  | 0.00000000  |
|                                                                                     | P           | -0.00011300 | -0.34196200 | -1.40636700 |
|                                                                                     | Cl          | -1.56908500 | -0.98884000 | 2.48222600  |
|                                                                                     | Cl          | -1.56821800 | 3.33195900  | 0.00000200  |
|                                                                                     | Cl          | 1.56855600  | -0.98999400 | 2.48199600  |
|                                                                                     | Cl          | 1.57097400  | 3.33058600  | 0.00000000  |
|                                                                                     | Cl          | -1.56908700 | -0.98883700 | -2.48222800 |
|                                                                                     | Cl          | 1.56855400  | -0.98999100 | -2.48200100 |
|                                                                                     | Cl          | -0.00086500 | -4.32215900 | 0.00000700  |
| H                                                                                   | -0.00081500 | -3.02164900 | 0.00000200  |             |

Color code: P = orange, N = blue, Cl = green, H = white

**Table S122.** Cartesian coordinates (in Angstrom, Å) of the transition state (**TS1**) for the HCl-initiated ring-opening reaction fully optimized at the M06-2X/6-311+G(d,p) level of theory.

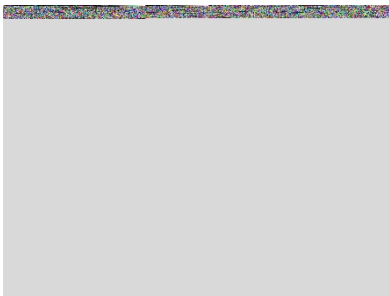

|    |             |             |             |
|----|-------------|-------------|-------------|
| N  | -1.71893600 | 0.80544900  | -0.31275300 |
| N  | 0.98073700  | 0.80743600  | -0.09911100 |
| N  | -0.33475200 | -1.34443200 | 0.47020300  |
| P  | -0.43392400 | 1.66939000  | -0.12251600 |
| P  | -1.70851200 | -0.77208700 | 0.00602100  |
| P  | 1.16922400  | -0.85304300 | 0.18078400  |
| Cl | -0.49186500 | 2.78243100  | 1.55091000  |
| Cl | -3.09893100 | -1.15903700 | 1.39717200  |
| Cl | -0.21123800 | 3.01833000  | -1.57173400 |
| Cl | -2.43618400 | -1.70055900 | -1.62936600 |
| Cl | 2.06951700  | -1.44004000 | 1.86757100  |
| Cl | 1.70191400  | -1.96017100 | -1.41115100 |
| Cl | 3.65505600  | 0.23541900  | -0.26953300 |
| H  | 1.90825400  | 1.25858300  | -0.24847700 |

Color code: P = orange, N = blue, Cl = green, H = white

**Table S123.** Cartesian coordinates (in Angstrom, Å) of the intermediate (**Int**) for the HCl-initiated ring-opening reaction fully optimized at the M06-2X/6-311+G(d,p) level of theory.



|    |             |             |             |
|----|-------------|-------------|-------------|
| N  | 1.85781700  | 0.38782300  | -0.46100600 |
| N  | -0.76054100 | 1.12433900  | -0.23883800 |
| N  | -0.06179900 | -1.16594700 | 0.54679100  |
| P  | 0.84886500  | 1.54647900  | -0.20217300 |
| P  | 1.38634900  | -1.09154000 | 0.01296400  |
| P  | -1.46538900 | -0.40761600 | 0.15189400  |
| Cl | 1.01837300  | 2.99390900  | -1.56672600 |
| Cl | 1.79831600  | -2.31870100 | -1.54198000 |
| Cl | 1.16876800  | 2.50814300  | 1.54385600  |
| Cl | 2.66327300  | -1.73808700 | 1.42519400  |
| Cl | -1.97557000 | -1.70734000 | -1.36214000 |
| Cl | -2.29836000 | -0.75649400 | 1.98666500  |
| Cl | -3.39666400 | 0.72473400  | -0.36163100 |
| H  | -1.42400100 | 1.86186500  | -0.46397000 |

Color code: P = orange, N = blue, Cl = green, H = white

**Table S124.** Cartesian coordinates (in Angstrom, Å) of the transition state (TS2) for the HCl-initiated ring-opening reaction fully optimized at the M06-2X/6-311+G(d,p) level of theory.

|                                                                                   |    |             |             |             |
|-----------------------------------------------------------------------------------|----|-------------|-------------|-------------|
|  | N  | -1.94802900 | -0.00357100 | -0.05898900 |
|                                                                                   | N  | 0.43980800  | 1.26637000  | -0.28300800 |
|                                                                                   | N  | 0.41243400  | -1.25558000 | -0.31612800 |
|                                                                                   | P  | -1.19425800 | 1.35777800  | -0.09776700 |
|                                                                                   | P  | -1.11252600 | -1.38197100 | -0.08212800 |
|                                                                                   | P  | 1.55423800  | -0.12071900 | -0.10457900 |
|                                                                                   | Cl | -1.55797200 | 2.45844200  | 1.55287900  |
|                                                                                   | Cl | -1.53987900 | -2.35763500 | 1.63675500  |
|                                                                                   | Cl | -1.86321700 | 2.55939400  | -1.56285900 |
|                                                                                   | Cl | -1.94279200 | -2.56473300 | -1.47617200 |
|                                                                                   | Cl | 1.94963600  | -0.22431000 | 1.90061500  |
|                                                                                   | Cl | 2.95635200  | -1.36883400 | -1.03750300 |
|                                                                                   | Cl | 3.05956700  | 1.49517700  | -0.47150100 |
|                                                                                   | H  | 0.90987600  | 2.16562600  | -0.34367100 |

Color code: P = orange, N = blue, Cl = green, H = white

**Table S125.** Cartesian coordinates (in Angstrom, Å) of the products (P<sup>2</sup>) for the HCl-initiated ring-opening reaction fully optimized at the M06-2X/6-311+G(d,p) level of theory.

|                                                                                     |    |             |             |             |
|-------------------------------------------------------------------------------------|----|-------------|-------------|-------------|
|  | N  | -1.71464200 | 0.58069500  | -0.43684900 |
|                                                                                     | N  | -0.08455800 | -1.26738400 | 0.54995200  |
|                                                                                     | N  | 0.90434600  | 1.07627900  | 0.06001500  |
|                                                                                     | P  | -1.55301000 | -0.92580400 | -0.02434400 |
|                                                                                     | P  | -0.55364900 | 1.62932000  | -0.11352800 |
|                                                                                     | P  | 1.56411800  | -0.36733900 | 0.13405000  |
|                                                                                     | Cl | -2.08208400 | -2.09298600 | -1.58534300 |
|                                                                                     | Cl | -0.58377600 | 3.00110100  | -1.57320000 |
|                                                                                     | Cl | -2.88606700 | -1.49310000 | 1.38143400  |
|                                                                                     | Cl | -1.04904000 | 2.70090600  | 1.52652900  |
|                                                                                     | Cl | 1.69767900  | -1.60355900 | -1.52656900 |
|                                                                                     | Cl | 3.52304100  | 0.39621700  | -0.23757600 |
|                                                                                     | Cl | 2.22500000  | -1.23617500 | 1.89213300  |
|                                                                                     | H  | 0.04128300  | -2.20067100 | 0.92956700  |

Color code: P = orange, N = blue, Cl = green, H = white

**Section 5.8 Electronic structures fully optimized at the cam-B3LYP/6-311+G(d,p) level of theory**

**Section 5.8.1. Cartesian Coordinates for the pivotal structure in the hydrolysis reaction followed by HCl-catalyzed tautomerization at the cam-B3LYP/6-311+G(d,p) level of theory**

**Table S126.** Cartesian coordinates (in Angstrom, Å) of the reactants (**R**) for the hydrolysis reaction fully optimized at the cam-B3LYP/6-311+G(d,p) level of theory.

|                                                                                   |    |             |             |             |
|-----------------------------------------------------------------------------------|----|-------------|-------------|-------------|
|  | P  | 0.61512600  | -1.37093100 | -0.03543900 |
|                                                                                   | P  | 0.51882000  | 1.43662400  | -0.01712100 |
|                                                                                   | P  | -1.85188200 | -0.05047100 | 0.02511200  |
|                                                                                   | N  | 1.32389000  | 0.05892600  | -0.04276300 |
|                                                                                   | N  | -0.96682600 | -1.36540400 | 0.00076000  |
|                                                                                   | N  | -1.05903400 | 1.32221900  | 0.01745500  |
|                                                                                   | Cl | 1.32942200  | -2.45181800 | 1.50301900  |
|                                                                                   | Cl | -3.08486400 | -0.10286900 | 1.61922300  |
|                                                                                   | Cl | 1.07982000  | 2.54698800  | -1.60607600 |
|                                                                                   | Cl | 1.15730400  | 2.54335500  | 1.53628600  |
|                                                                                   | Cl | -3.14493300 | -0.08515100 | -1.52237200 |
|                                                                                   | Cl | 1.24946900  | -2.41896400 | -1.63912600 |
|                                                                                   | H  | 4.66944900  | 0.17805700  | -0.57151500 |
|                                                                                   | O  | 4.27622400  | 0.15846400  | 0.30385200  |
|                                                                                   | H  | 3.32070400  | 0.12651000  | 0.15729000  |

Color code: P = orange, N = blue, Cl = green, O = red, H = white

**Table S127.** Cartesian coordinates (in Angstrom, Å) of the transition state (**TS**) for the hydrolysis reaction fully optimized at the cam-B3LYP/6-311+G(d,p) level of theory.

|                                                                                     |    |             |             |             |
|-------------------------------------------------------------------------------------|----|-------------|-------------|-------------|
| 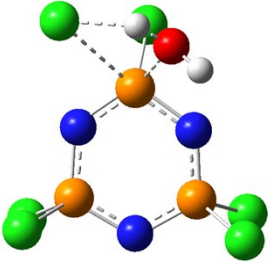 | P  | -1.22588800 | -0.81447900 | 0.08837400  |
|                                                                                     | P  | 1.62583500  | -0.75039700 | -0.14211100 |
|                                                                                     | P  | 0.24062400  | 1.62413300  | 0.09021200  |
|                                                                                     | N  | 0.22531600  | -1.48399000 | -0.18156600 |
|                                                                                     | N  | -1.06931400 | 0.75265200  | 0.28391900  |
|                                                                                     | N  | 1.60588900  | 0.83322300  | -0.08262100 |
|                                                                                     | Cl | -2.04390500 | -1.65984500 | 1.71185600  |
|                                                                                     | Cl | 0.38096200  | 2.88562200  | 1.65259400  |
|                                                                                     | Cl | 2.69428900  | -1.33599500 | -1.75795800 |
|                                                                                     | Cl | 2.74975400  | -1.46826000 | 1.38093000  |
|                                                                                     | Cl | 0.01049000  | 2.88211600  | -1.47326500 |
|                                                                                     | Cl | -3.56850100 | -0.17618700 | -0.82279000 |
|                                                                                     | H  | -2.71119800 | -1.67643300 | -1.52567800 |
|                                                                                     | O  | -1.85808900 | -2.08500200 | -1.14714500 |
|                                                                                     | H  | -1.15840000 | -2.41230000 | -1.73566100 |

Color code: P = orange, N = blue, Cl = green, O = red, H = white

**Table S128.** Cartesian coordinates (in Angstrom, Å) of the products with one hydrogen bond (**P\_1HB**) for the hydrolysis reaction fully optimized at the cam-B3LYP/6-311+G(d,p) level of theory.

|                                                                                   |    |             |             |             |
|-----------------------------------------------------------------------------------|----|-------------|-------------|-------------|
|  | P  | -0.61227900 | -1.21426900 | 0.60400600  |
|                                                                                   | P  | 1.76973600  | -0.41075400 | -0.60032400 |
|                                                                                   | P  | -0.06673200 | 1.49837600  | 0.30760900  |
|                                                                                   | N  | 0.75701700  | -1.53893900 | -0.13310200 |
|                                                                                   | N  | -1.01847300 | 0.30667800  | 0.74322800  |
|                                                                                   | N  | 1.31893800  | 1.08629700  | -0.34574100 |
|                                                                                   | Cl | -0.59484100 | -2.10713400 | 2.42269500  |
|                                                                                   | Cl | 0.28543500  | 2.69899500  | 1.89149400  |
|                                                                                   | Cl | 2.18319200  | -0.66982200 | -2.56038600 |
|                                                                                   | Cl | 3.57425500  | -0.71365300 | 0.25481800  |
|                                                                                   | Cl | -1.06985900 | 2.71821200  | -0.94398400 |
|                                                                                   | Cl | -4.60802500 | -0.61252100 | -1.32094300 |
|                                                                                   | H  | -3.50270100 | -0.98994100 | -0.77178500 |
|                                                                                   | O  | -1.83229700 | -1.94394300 | -0.13100600 |
|                                                                                   | H  | -1.69483400 | -2.87635800 | -0.34303100 |

Color code: P = orange, N = blue, Cl = green, O = red, H = white

**Table S129.** Cartesian coordinates (in Angstrom, Å) of the hydrogen bond configuration change transition state (**TS\_HB**) for the hydrolysis reaction fully optimized at the cam-B3LYP/6-311+G(d,p) level of theory.

|                                                                                     |    |             |             |             |
|-------------------------------------------------------------------------------------|----|-------------|-------------|-------------|
| 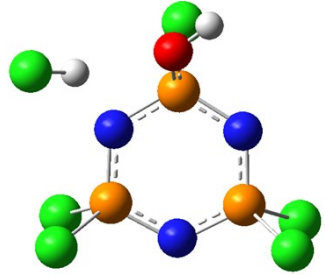 | P  | -0.42332700 | -1.45643400 | 0.27094500  |
|                                                                                     | P  | 1.86098600  | -0.07739800 | -0.53476900 |
|                                                                                     | P  | -0.34675800 | 1.32087500  | 0.47160500  |
|                                                                                     | N  | 1.03195200  | -1.41856900 | -0.36338000 |
|                                                                                     | N  | -1.11356100 | -0.06469800 | 0.58027500  |
|                                                                                     | N  | 1.13921800  | 1.25747500  | -0.07986500 |
|                                                                                     | Cl | -0.36456600 | -2.60864700 | 1.93904400  |
|                                                                                     | Cl | -0.33856600 | 2.24271300  | 2.26789300  |
|                                                                                     | Cl | 2.44816700  | 0.09125800  | -2.46043200 |
|                                                                                     | Cl | 3.62716800  | -0.23507000 | 0.43164700  |
|                                                                                     | Cl | -1.44070400 | 2.58096000  | -0.65596900 |
|                                                                                     | Cl | -4.38456100 | -0.50512800 | -1.34181400 |
|                                                                                     | H  | -3.25040600 | -0.87301500 | -0.85547000 |
|                                                                                     | O  | -1.45314200 | -2.23327500 | -0.66443200 |
|                                                                                     | H  | -1.18917600 | -3.10932200 | -0.97129400 |

Color code: P = orange, N = blue, Cl = green, O = red, H = white

**Table S130.** Cartesian coordinates (in Angstrom, Å) of the products with two hydrogen bonds (**P\_2HB**) for the hydrolysis reaction fully optimized at the cam-B3LYP/6-311+G(d,p) level of theory.

|  |    |             |             |             |
|--|----|-------------|-------------|-------------|
|  | P  | -0.56281600 | -1.40978800 | -0.11762700 |
|  | P  | 1.94492800  | -0.19333100 | -0.25466300 |
|  | P  | -0.32005700 | 1.36838400  | 0.26191200  |
|  | N  | 0.99438100  | -1.44994200 | -0.37601800 |
|  | N  | -1.20676700 | 0.05817200  | 0.05725700  |
|  | N  | 1.23950800  | 1.18829000  | 0.08665700  |
|  | Cl | -1.00477100 | -2.48645600 | 1.54211500  |
|  | Cl | -0.70004900 | 2.18397700  | 2.07125100  |
|  | Cl | 3.01478200  | 0.00311200  | -1.95280800 |
|  | Cl | 3.37997600  | -0.54550700 | 1.11937500  |
|  | Cl | -1.00509200 | 2.79074300  | -0.99373000 |
|  | Cl | -4.12333100 | -0.50948400 | -0.88930600 |
|  | H  | -3.01756500 | -0.00040600 | -0.38752100 |
|  | O  | -1.29841800 | -2.17809200 | -1.28157900 |
|  | H  | -2.26153900 | -2.04801000 | -1.32668800 |

Color code: P = orange, N = blue, Cl = green, O = red, H = white

**Table S131.** Cartesian coordinates (in Angstrom, Å) of the synchronous proton transfer transition state (**SPT\_TS**) after the hydrolysis reaction fully optimized at the cam-B3LYP/6-311+G(d,p) level of theory.

|  |    |             |             |             |
|--|----|-------------|-------------|-------------|
|  | P  | -0.52176900 | -1.49845800 | -0.13427300 |
|  | P  | 1.90817500  | -0.10760600 | -0.27707800 |
|  | P  | -0.42624300 | 1.34985800  | 0.32380600  |
|  | N  | 1.01629400  | -1.39746100 | -0.44909200 |
|  | N  | -1.24426400 | -0.02235900 | 0.04864800  |
|  | N  | 1.12908900  | 1.20654700  | 0.16673300  |
|  | Cl | -0.78791800 | -2.53028000 | 1.57786400  |
|  | Cl | -0.87040200 | 2.05843100  | 2.15177600  |
|  | Cl | 2.91310200  | 0.24850900  | -1.98289300 |
|  | Cl | 3.38530600  | -0.44613900 | 1.04733600  |
|  | Cl | -1.18986900 | 2.74167900  | -0.89878100 |
|  | Cl | -3.76684600 | -0.57794700 | -1.04800800 |
|  | H  | -2.41938200 | -0.08061400 | -0.34157800 |
|  | O  | -1.32957100 | -2.25814700 | -1.22252500 |
|  | H  | -2.27166500 | -1.92050500 | -1.33306500 |

Color code: P = orange, N = blue, Cl = green, O = red, H = white

**Table S132.** Cartesian coordinates (in Angstrom, Å) of the final product (**P**) after the HCl-catalyzed tautomerization fully optimized at the cam-B3LYP/6-311+G(d,p) level of theory.

|                                                                                   |    |             |             |             |
|-----------------------------------------------------------------------------------|----|-------------|-------------|-------------|
| 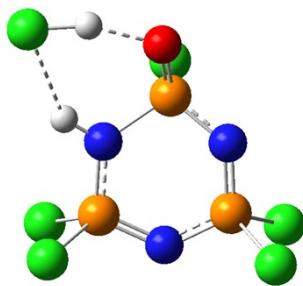 | P  | -0.68208300 | -1.48727100 | -0.10423300 |
|                                                                                   | P  | 1.88237200  | -0.30954400 | -0.37785700 |
|                                                                                   | P  | -0.21173300 | 1.45239400  | 0.29314100  |
|                                                                                   | N  | 0.82508000  | -1.43729400 | -0.60329500 |
|                                                                                   | N  | -1.19387700 | 0.16616900  | 0.04217600  |
|                                                                                   | N  | 1.29176200  | 1.08998300  | 0.13246100  |
|                                                                                   | Cl | -0.65063700 | -2.12010900 | 1.84252400  |
|                                                                                   | Cl | -0.56865700 | 2.25087600  | 2.10346500  |
|                                                                                   | Cl | 2.91998900  | 0.00394600  | -2.07313200 |
|                                                                                   | Cl | 3.32060800  | -0.85400400 | 0.92649100  |
|                                                                                   | Cl | -0.83165400 | 2.90256500  | -0.95438400 |
|                                                                                   | Cl | -4.31029000 | -0.68843500 | -1.03054800 |
|                                                                                   | H  | -2.20196400 | 0.30587500  | -0.03540900 |
|                                                                                   | O  | -1.71507400 | -2.21642600 | -0.86140500 |
|                                                                                   | H  | -3.31562400 | -1.55240800 | -1.08358000 |

Color code: P = orange, N = blue, Cl = green, O = red, H = white

### Section 5.8.2. Cartesian Coordinates for chemical species appearing in the tautomerization reaction without the interference from HCl at the cam-B3LYP/6-311+G(d,p) level of theory

**Table S133.** Cartesian coordinates (in Angstrom, Å) of the reactants of the tautomerization reaction without the interferences of HCl (**Tauto\_R**) fully optimized at the cam-B3LYP/6-311+G(d,p) level of theory.

|                                                                                     |    |             |             |             |
|-------------------------------------------------------------------------------------|----|-------------|-------------|-------------|
|  | P  | 0.03230300  | 1.68928200  | -0.56078800 |
|                                                                                     | P  | -1.41843600 | -0.60667000 | 0.05233000  |
|                                                                                     | P  | 1.37534200  | -0.68063400 | 0.05299300  |
|                                                                                     | N  | -1.33408700 | 0.90885400  | -0.39292600 |
|                                                                                     | N  | 1.36712500  | 0.83421400  | -0.40711000 |
|                                                                                     | N  | -0.03953900 | -1.35963000 | 0.27509500  |
|                                                                                     | Cl | 0.10742800  | 3.22792000  | 0.76470800  |
|                                                                                     | Cl | 2.47680400  | -0.88772300 | 1.73674800  |
|                                                                                     | Cl | -2.53176900 | -1.63176300 | -1.28555800 |
|                                                                                     | Cl | -2.52900700 | -0.76419800 | 1.73344400  |
|                                                                                     | Cl | 2.44271000  | -1.76810200 | -1.27611500 |
|                                                                                     | O  | -0.00413000 | 2.42753400  | -1.96547800 |
|                                                                                     | H  | 0.81559600  | 2.87171100  | -2.21448400 |

Color code: P = orange, N = blue, Cl = green, O = red, H = white

**Table S134.** Cartesian coordinates (in Angstrom, Å) of the tautomerization transition state without the interferences (**Tauto\_TS**) fully optimized at the cam-B3LYP/6-311+G(d,p) of theory.

|                                                                                   |    |             |             |             |
|-----------------------------------------------------------------------------------|----|-------------|-------------|-------------|
|  | P  | -0.12475700 | 1.73651900  | -0.66397200 |
|                                                                                   | P  | -1.39625400 | -0.66173100 | 0.03816500  |
|                                                                                   | P  | 1.41822900  | -0.58758100 | 0.15310000  |
|                                                                                   | N  | -1.40032300 | 0.81070700  | -0.52465300 |
|                                                                                   | N  | 1.33101700  | 0.91361500  | -0.42479700 |
|                                                                                   | N  | 0.02286000  | -1.25227800 | 0.45319000  |
|                                                                                   | Cl | -0.31553500 | 3.25546100  | 0.64480800  |
|                                                                                   | Cl | 2.54109700  | -0.65436000 | 1.82488400  |
|                                                                                   | Cl | -2.27446500 | -1.89638800 | -1.29457300 |
|                                                                                   | Cl | -2.61732600 | -0.80993900 | 1.63516200  |
|                                                                                   | Cl | 2.50972400  | -1.67098600 | -1.15190500 |
|                                                                                   | O  | 0.39075600  | 2.25833100  | -2.00601600 |
|                                                                                   | H  | 1.40140600  | 1.51655700  | -1.57987100 |

Color code: P = orange, N = blue, Cl = green, O = red, H = white

**Table S135.** Cartesian coordinates (in Angstrom, Å) of the product of the tautomerization reaction without the interferences (**Tauto\_P**) fully optimized at the cam-B3LYP/6-311+G(d,p) level of theory.

|                                                                                     |    |             |             |             |
|-------------------------------------------------------------------------------------|----|-------------|-------------|-------------|
|  | P  | -0.18744400 | 1.74941700  | -0.92484500 |
|                                                                                     | P  | -1.39641700 | -0.64050600 | 0.03002600  |
|                                                                                     | P  | 1.41648300  | -0.59307300 | 0.10285700  |
|                                                                                     | N  | -1.37137300 | 0.69085500  | -0.77944700 |
|                                                                                     | N  | 1.27721800  | 0.81191700  | -0.72439500 |
|                                                                                     | N  | 0.03842800  | -1.19733600 | 0.48696700  |
|                                                                                     | Cl | -0.19543900 | 2.86865200  | 0.80346800  |
|                                                                                     | Cl | 2.57009100  | -0.32771000 | 1.73209400  |
|                                                                                     | Cl | -2.32950200 | -2.07496600 | -1.03209200 |
|                                                                                     | Cl | -2.53100400 | -0.52278600 | 1.69580300  |
|                                                                                     | Cl | 2.54935600  | -1.82056700 | -1.02532000 |
|                                                                                     | O  | -0.03517600 | 2.59949200  | -2.10436500 |
|                                                                                     | H  | 2.10261600  | 1.24385000  | -1.12473600 |

Color code: P = orange, N = blue, Cl = green, O = red, H = white

**Section 5.8.3. Cartesian Coordinates for chemical species appearing in the ring-opening reaction at the cam-B3LYP/6-311+G(d,p) level of theory**

**Table S136.** Cartesian coordinates (in Angstrom, Å) of the reactants (**R'**) for the HCl-initiated ring-opening reaction fully optimized at the cam-B3LYP/6-311+G(d,p) level of theory.

|  |    |             |             |             |
|--|----|-------------|-------------|-------------|
|  | N  | -0.00003600 | -1.23576400 | 1.34365200  |
|  | N  | -0.00004800 | 1.10341700  | 0.00000000  |
|  | N  | -0.00003600 | -1.23576400 | -1.34365200 |
|  | P  | -0.00002800 | 0.34410600  | 1.40698300  |
|  | P  | -0.00000500 | -2.07723900 | 0.00000000  |
|  | P  | -0.00002800 | 0.34410600  | -1.40698300 |
|  | Cl | 1.57145800  | 0.98483500  | 2.49078300  |
|  | Cl | 1.57140700  | -3.33928600 | 0.00000000  |
|  | Cl | -1.57147100 | 0.98484800  | 2.49082900  |
|  | Cl | -1.57131800 | -3.33939900 | 0.00000000  |
|  | Cl | 1.57145800  | 0.98483500  | -2.49078300 |
|  | Cl | -1.57147100 | 0.98484800  | -2.49082900 |
|  | Cl | 0.00004200  | 4.34910400  | 0.00000000  |
|  | H  | -0.00000200 | 3.04581500  | 0.00000000  |

Color code: P = orange, N = blue, Cl = green, H = white

**Table S137.** Cartesian coordinates (in Angstrom, Å) of the transition state (**TS1**) for the HCl-initiated ring-opening reaction fully optimized at the cam-B3LYP/6-311+G(d,p) level of theory.

|  |    |             |             |             |
|--|----|-------------|-------------|-------------|
|  | N  | -1.90734200 | -0.13362700 | 0.00000000  |
|  | N  | 0.44481300  | 1.19728000  | 0.00000000  |
|  | N  | 0.43937400  | -1.37330200 | 0.00000000  |
|  | P  | -1.21214700 | 1.25372400  | 0.00000000  |
|  | P  | -1.09912200 | -1.52309300 | 0.00000000  |
|  | P  | 1.48632900  | -0.15284700 | 0.00000000  |
|  | Cl | -1.74683600 | 2.38766200  | 1.56906000  |
|  | Cl | -1.74683600 | -2.60996900 | 1.57097700  |
|  | Cl | -1.74683600 | 2.38766200  | -1.56906000 |
|  | Cl | -1.74683600 | -2.60996900 | -1.57097700 |
|  | Cl | 2.51229100  | -0.58019800 | 1.68772000  |
|  | Cl | 2.51229100  | -0.58019800 | -1.68772000 |
|  | Cl | 3.05349900  | 1.98319100  | 0.00000000  |
|  | H  | 0.99367000  | 2.07171300  | 0.00000000  |

Color code: P = orange, N = blue, Cl = green, H = white

**Table S138.** Cartesian coordinates (in Angstrom, Å) of the intermediate (**Int**) for the HCl-initiated ring-opening reaction fully optimized at the cam-B3LYP/6-311+G(d,p) level of theory.

|  |    |             |             |             |
|--|----|-------------|-------------|-------------|
|  | N  | -1.85134600 | 0.51816900  | -0.00017900 |
|  | N  | 0.80921400  | 1.05824200  | -0.00013000 |
|  | N  | 0.02687600  | -1.35173700 | 0.00025000  |
|  | P  | -0.75643200 | 1.61243800  | -0.00027100 |
|  | P  | -1.47751400 | -1.05294900 | 0.00009500  |
|  | P  | 1.44564600  | -0.55428000 | 0.00015200  |
|  | Cl | -0.90767100 | 2.86764600  | 1.56728600  |
|  | Cl | -2.43637400 | -1.89209300 | 1.57033900  |
|  | Cl | -0.90752400 | 2.86723000  | -1.56817400 |
|  | Cl | -2.43616800 | -1.89258300 | -1.57001400 |
|  | Cl | 2.12892600  | -1.40484200 | 1.74113800  |
|  | Cl | 2.12901500  | -1.40539400 | -1.74053000 |
|  | Cl | 3.45289000  | 0.65893400  | 0.00001300  |
|  | H  | 1.53868300  | 1.76787800  | -0.00022100 |

Color code: P = orange, N = blue, Cl = green, H = white

**Table S139.** Cartesian coordinates (in Angstrom, Å) of the transition state (**TS2**) for the HCl-initiated ring-opening reaction fully optimized at the cam-B3LYP/6-311+G(d,p) level of theory.

|  |    |             |             |             |
|--|----|-------------|-------------|-------------|
|  | N  | -1.94164300 | 0.00074300  | -0.04212200 |
|  | N  | 0.44183900  | 1.26428900  | -0.16820100 |
|  | N  | 0.40896800  | -1.25586800 | -0.09354900 |
|  | P  | -1.19697500 | 1.36352500  | -0.07149100 |
|  | P  | -1.12757200 | -1.38584300 | -0.04248600 |
|  | P  | 1.56329800  | -0.12618000 | -0.02170800 |
|  | Cl | -1.66405100 | 2.50898000  | 1.52463800  |
|  | Cl | -1.73386200 | -2.44905200 | 1.56477100  |
|  | Cl | -1.78721900 | 2.52838000  | -1.60739800 |
|  | Cl | -1.82287400 | -2.49310000 | -1.57993500 |
|  | Cl | 2.12511100  | -0.13163200 | 1.94515300  |
|  | Cl | 2.91543600  | -1.43721400 | -0.97289500 |
|  | Cl | 3.03396400  | 1.47440300  | -0.61298700 |
|  | H  | 0.92399700  | 2.15033800  | -0.28053000 |

Color code: P = orange, N = blue, Cl = green, H = white

**Table S140.** Cartesian coordinates (in Angstrom, Å) of the products (**P'**) for the HCl-initiated ring-opening reaction fully optimized at the cam-B3LYP/6-311+G(d,p) level of theory.

|                                                                                   |    |             |             |             |
|-----------------------------------------------------------------------------------|----|-------------|-------------|-------------|
|  | N  | -1.74796400 | 0.67540500  | -0.17524200 |
|                                                                                   | N  | -0.12278300 | -1.35815300 | 0.33882900  |
|                                                                                   | N  | 0.91723600  | 1.00047700  | 0.04114600  |
|                                                                                   | P  | -1.62108200 | -0.87337100 | 0.00985200  |
|                                                                                   | P  | -0.50048900 | 1.65442700  | -0.04404500 |
|                                                                                   | P  | 1.55978400  | -0.44567400 | 0.07450900  |
|                                                                                   | Cl | -2.38194100 | -1.81789700 | -1.61503700 |
|                                                                                   | Cl | -0.56326900 | 2.93674400  | -1.59389800 |
|                                                                                   | Cl | -2.83922100 | -1.55750900 | 1.47316100  |
|                                                                                   | Cl | -0.77252200 | 2.86464900  | 1.54864800  |
|                                                                                   | Cl | 1.77698600  | -1.61459300 | -1.62984000 |
|                                                                                   | Cl | 3.54978900  | 0.31382600  | -0.15917400 |
|                                                                                   | Cl | 2.11918000  | -1.41433800 | 1.82309100  |
|                                                                                   | H  | -0.01168500 | -2.33981600 | 0.56396600  |

Color code: P = orange, N = blue, Cl = green, H = white

## Section 5.9 Electronic structures fully optimized at the PBE0/6-311+G(d,p) level of theory

### Section 5.9.1. Cartesian Coordinates for the pivotal structure in the hydrolysis reaction followed by HCl-catalyzed tautomerization at the PBE0/6-311+G(d,p) level of theory

**Table S141.** Cartesian coordinates (in Angstrom, Å) of the reactants (**R**) for the hydrolysis reaction fully optimized at the PBE0/6-311+G(d,p) level of theory.

|                                                                                     |            |             |             |             |
|-------------------------------------------------------------------------------------|------------|-------------|-------------|-------------|
|  | P          | 0.61149000  | -1.36941000 | -0.03225100 |
|                                                                                     | P          | 0.51697000  | 1.43272200  | -0.01410500 |
|                                                                                     | P          | -1.84852200 | -0.05009900 | 0.02423900  |
|                                                                                     | N          | 1.33304100  | 0.05765000  | -0.03475600 |
|                                                                                     | N          | -0.97476700 | -1.37775900 | 0.00421200  |
|                                                                                     | N          | -1.06624400 | 1.33355700  | 0.02013200  |
|                                                                                     | Cl         | 1.32419700  | -2.45222600 | 1.50136300  |
|                                                                                     | Cl         | -3.08524700 | -0.10141400 | 1.61134500  |
|                                                                                     | Cl         | 1.07888200  | 2.53593500  | -1.60380200 |
|                                                                                     | Cl         | 1.15434500  | 2.54036800  | 1.53488000  |
|                                                                                     | Cl         | -3.13258900 | -0.08419200 | -1.52690100 |
|                                                                                     | Cl         | 1.24449600  | -2.41083400 | -1.63694100 |
|                                                                                     | H          | 4.65273900  | 0.18126500  | -0.58877000 |
|                                                                                     | O          | 4.29044400  | 0.16267100  | 0.29812600  |
| H                                                                                   | 3.33345400 | 0.12730000  | 0.17181400  |             |

Color code: P = orange, N = blue, Cl = green, O = red, H = white

**Table S142.** Cartesian coordinates (in Angstrom, Å) of the transition state (TS) for the hydrolysis reaction fully optimized at the PBE0/6-311+G(d,p) level of theory.

|  |    |             |             |             |
|--|----|-------------|-------------|-------------|
|  | P  | -1.19220800 | -0.85303900 | 0.12019300  |
|  | P  | 1.64110500  | -0.71362600 | -0.17451600 |
|  | P  | 0.20806400  | 1.61532900  | 0.10027400  |
|  | N  | 0.25816700  | -1.49476400 | -0.21596100 |
|  | N  | -1.06621700 | 0.71306600  | 0.39796200  |
|  | N  | 1.59693200  | 0.87453600  | -0.14474600 |
|  | Cl | -2.00668000 | -1.71126100 | 1.73226200  |
|  | Cl | 0.39414900  | 2.90099500  | 1.63266700  |
|  | Cl | 2.72340500  | -1.29764600 | -1.77234000 |
|  | Cl | 2.76496400  | -1.38604800 | 1.36668600  |
|  | Cl | -0.14586500 | 2.83757000  | -1.46507200 |
|  | Cl | -3.52772700 | -0.17784200 | -0.85846400 |
|  | H  | -2.71537000 | -1.65858200 | -1.42487500 |
|  | O  | -1.86499300 | -2.14295900 | -1.07725600 |
|  | H  | -1.17946900 | -2.39559100 | -1.71468500 |

Color code: P = orange, N = blue, Cl = green, O = red, H = white

**Table S143.** Cartesian coordinates (in Angstrom, Å) of the products with one hydrogen bond (P\_1HB) for the hydrolysis reaction fully optimized at the PBE0/6-311+G(d,p) level of theory.

|  |    |             |             |             |
|--|----|-------------|-------------|-------------|
|  | P  | -0.57342300 | -1.24205700 | 0.61426700  |
|  | P  | 1.75251200  | -0.36399900 | -0.62744000 |
|  | P  | -0.11488800 | 1.47895400  | 0.33251600  |
|  | N  | 0.77977600  | -1.53700400 | -0.17186400 |
|  | N  | -1.04363200 | 0.26332700  | 0.76785500  |
|  | N  | 1.28061400  | 1.12603200  | -0.34431400 |
|  | Cl | -0.46338100 | -2.13010900 | 2.42985200  |
|  | Cl | 0.22647600  | 2.66537400  | 1.92540500  |
|  | Cl | 2.14161300  | -0.58037400 | -2.59389200 |
|  | Cl | 3.57347700  | -0.63356900 | 0.19653800  |
|  | Cl | -1.16561800 | 2.68366900  | -0.88846100 |
|  | Cl | -4.52689500 | -0.65135600 | -1.35589500 |
|  | H  | -3.44328000 | -1.04895700 | -0.77828500 |
|  | O  | -1.79510700 | -2.01007800 | -0.07957000 |
|  | H  | -1.63264800 | -2.94218700 | -0.26731900 |

Color code: P = orange, N = blue, Cl = green, O = red, H = white

**Table S144.** Cartesian coordinates (in Angstrom, Å) of the hydrogen bond configuration change transition state (**TS\_HB**) for the hydrolysis reaction fully optimized at the PBE0/6-311+G(d,p) level of theory.

|  |    |             |             |             |
|--|----|-------------|-------------|-------------|
|  | P  | -0.42598000 | -1.44423300 | 0.29738600  |
|  | P  | 1.84289100  | -0.08708100 | -0.55726500 |
|  | P  | -0.33638900 | 1.32454200  | 0.47415400  |
|  | N  | 1.01264000  | -1.43230000 | -0.38464600 |
|  | N  | -1.12571600 | -0.05155900 | 0.59938000  |
|  | N  | 1.14835300  | 1.26410900  | -0.09308800 |
|  | Cl | -0.31914700 | -2.56215200 | 1.98325900  |
|  | Cl | -0.29905600 | 2.24972700  | 2.26473900  |
|  | Cl | 2.40510700  | 0.07738300  | -2.48699000 |
|  | Cl | 3.61679700  | -0.25747900 | 0.38660000  |
|  | Cl | -1.43424800 | 2.58502300  | -0.64311900 |
|  | Cl | -4.38977000 | -0.52781100 | -1.35884800 |
|  | H  | -3.26367900 | -0.92261500 | -0.87436500 |
|  | O  | -1.47995700 | -2.23995400 | -0.59757600 |
|  | H  | -1.20602700 | -3.11766300 | -0.88656500 |

Color code: P = orange, N = blue, Cl = green, O = red, H = white

**Table S145.** Cartesian coordinates (in Angstrom, Å) of the products with two hydrogen bonds (**P\_2HB**) for the hydrolysis reaction fully optimized at the PBE0/6-311+G(d,p) level of theory.

|  |    |             |             |             |
|--|----|-------------|-------------|-------------|
|  | P  | -0.56014100 | -1.40845300 | -0.14307100 |
|  | P  | 1.93345800  | -0.18536500 | -0.25846700 |
|  | P  | -0.33370200 | 1.36366000  | 0.26284300  |
|  | N  | 0.99469900  | -1.44943600 | -0.43760000 |
|  | N  | -1.22471200 | 0.05867800  | 0.01102100  |
|  | N  | 1.23388300  | 1.19679000  | 0.11244000  |
|  | Cl | -0.95808700 | -2.44899900 | 1.54692100  |
|  | Cl | -0.74008500 | 2.13540800  | 2.08138000  |
|  | Cl | 3.02602700  | 0.05470100  | -1.93144100 |
|  | Cl | 3.34397900  | -0.57020400 | 1.12792200  |
|  | Cl | -1.00196600 | 2.80578200  | -0.97134600 |
|  | Cl | -4.07613000 | -0.53674100 | -0.89794800 |
|  | H  | -2.94777600 | -0.02696100 | -0.41666000 |
|  | O  | -1.31184500 | -2.20046400 | -1.27992800 |
|  | H  | -2.27235200 | -2.03828900 | -1.30780200 |

Color code: P = orange, N = blue, Cl = green, O = red, H = white

**Table S146.** Cartesian coordinates (in Angstrom, Å) of the synchronous proton transfer transition state (SPT\_TS) after the hydrolysis reaction fully optimized at the PBE0/6-311+G(d,p) level of theory.

|  |    |             |             |             |
|--|----|-------------|-------------|-------------|
|  | P  | -0.51962600 | -1.49525500 | -0.15643100 |
|  | P  | 1.89166500  | -0.10090300 | -0.29583900 |
|  | P  | -0.43657800 | 1.34513700  | 0.33682500  |
|  | N  | 1.00412200  | -1.38420200 | -0.55568000 |
|  | N  | -1.25641000 | -0.02069400 | 0.02674200  |
|  | N  | 1.12568700  | 1.20612500  | 0.20647800  |
|  | Cl | -0.68139600 | -2.47658100 | 1.59657100  |
|  | Cl | -0.90150900 | 2.02712000  | 2.16507500  |
|  | Cl | 2.91803300  | 0.32693900  | -1.96707600 |
|  | Cl | 3.34662400  | -0.50264800 | 1.03244900  |
|  | Cl | -1.18195600 | 2.75136700  | -0.87632500 |
|  | Cl | -3.76053200 | -0.63226600 | -1.06369500 |
|  | H  | -2.40705000 | -0.08594400 | -0.35304000 |
|  | O  | -1.37369800 | -2.28205000 | -1.18263600 |
|  | H  | -2.31655900 | -1.89777700 | -1.27595100 |

Color code: P = orange, N = blue, Cl = green, O = red, H = white

**Table S147.** Cartesian coordinates (in Angstrom, Å) of the final product (P) after the HCl-catalyzed tautomerization fully optimized at the PBE0/6-311+G(d,p) level of theory.

|  |    |             |             |             |
|--|----|-------------|-------------|-------------|
|  | P  | -0.66622300 | -1.48316300 | -0.15396000 |
|  | P  | 1.87558600  | -0.29318400 | -0.36561500 |
|  | P  | -0.23932000 | 1.44297600  | 0.29009500  |
|  | N  | 0.83470700  | -1.42274200 | -0.68575600 |
|  | N  | -1.20493100 | 0.15801900  | -0.02161800 |
|  | N  | 1.27754300  | 1.09445400  | 0.17968000  |
|  | Cl | -0.60183700 | -2.09726300 | 1.79395000  |
|  | Cl | -0.65536900 | 2.20378700  | 2.10003100  |
|  | Cl | 2.96923400  | 0.07754400  | -2.00840400 |
|  | Cl | 3.26349700  | -0.88026600 | 0.97083500  |
|  | Cl | -0.82156900 | 2.91113500  | -0.94940500 |
|  | Cl | -4.26412600 | -0.72136800 | -0.99480000 |
|  | H  | -2.21618900 | 0.28301700  | -0.11209500 |
|  | O  | -1.69504900 | -2.23808200 | -0.89975000 |
|  | H  | -3.25242500 | -1.57657900 | -1.06138300 |

Color code: P = orange, N = blue, Cl = green, O = red, H = white

**Section 5.9.2. Cartesian Coordinates for chemical species appearing in the tautomerization reaction without the interference from HCl at the PBE0/6-311+G(d,p) level of theory**

**Table S148.** Cartesian coordinates (in Angstrom, Å) of the reactants of the tautomerization reaction without the interferences of HCl (**Tauto\_R**) fully optimized at the PBE0/6-311+G(d,p) level of theory.

|  |    |             |             |             |
|--|----|-------------|-------------|-------------|
|  | P  | 0.03195400  | 1.67583800  | -0.59058000 |
|  | P  | -1.41549400 | -0.60036700 | 0.05565700  |
|  | P  | 1.37177600  | -0.67674200 | 0.05298900  |
|  | N  | -1.34677100 | 0.90524500  | -0.43955900 |
|  | N  | 1.37668300  | 0.82441600  | -0.46346200 |
|  | N  | -0.04039800 | -1.35830700 | 0.31279400  |
|  | Cl | 0.11432900  | 3.18969600  | 0.76029600  |
|  | Cl | 2.47779100  | -0.83169700 | 1.73588800  |
|  | Cl | -2.52126200 | -1.66189200 | -1.25472600 |
|  | Cl | -2.52762000 | -0.71071900 | 1.73553200  |
|  | Cl | 2.42802200  | -1.80526600 | -1.24442300 |
|  | O  | -0.00983600 | 2.43524500  | -1.98511000 |
|  | H  | 0.81710900  | 2.87555200  | -2.21214600 |

Color code: P = orange, N = blue, Cl = green, O = red, H = white

**Table S149.** Cartesian coordinates (in Angstrom, Å) of the tautomerization transition state without the interferences (**Tauto\_TS**) fully optimized at the PBE0/6-311+G(d,p) of theory.

|  |    |             |             |             |
|--|----|-------------|-------------|-------------|
|  | P  | -0.16750800 | 1.72674000  | -0.67572700 |
|  | P  | -1.37117900 | -0.69182200 | 0.03829300  |
|  | P  | 1.43238600  | -0.54326400 | 0.16708700  |
|  | N  | -1.42446400 | 0.76292500  | -0.57777100 |
|  | N  | 1.31625800  | 0.95740300  | -0.41550900 |
|  | N  | 0.05492800  | -1.23784600 | 0.50517200  |
|  | Cl | -0.43044900 | 3.22463800  | 0.63985100  |
|  | Cl | 2.58052400  | -0.58694400 | 1.81726900  |
|  | Cl | -2.18838900 | -1.98768700 | -1.27007600 |
|  | Cl | -2.60813500 | -0.83317100 | 1.61986100  |
|  | Cl | 2.51808000  | -1.61073200 | -1.15320400 |
|  | O  | 0.34768100  | 2.27361400  | -2.00966800 |
|  | H  | 1.36827700  | 1.55515400  | -1.56359900 |

Color code: P = orange, N = blue, Cl = green, O = red, H = white

**Table S150.** Cartesian coordinates (in Angstrom, Å) of the product of the tautomerization reaction without the interferences (**Tauto\_P**) fully optimized at the PBE0/6-311+G(d,p) level of theory.

|                                                                                   |    |             |             |             |
|-----------------------------------------------------------------------------------|----|-------------|-------------|-------------|
|  | P  | -0.21071600 | 1.72988400  | -0.94789500 |
|                                                                                   | P  | -1.38291700 | -0.64930400 | 0.02478300  |
|                                                                                   | P  | 1.42481300  | -0.56715800 | 0.10221900  |
|                                                                                   | N  | -1.38638100 | 0.64876800  | -0.84931800 |
|                                                                                   | N  | 1.26452000  | 0.80889300  | -0.76960000 |
|                                                                                   | N  | 0.05429400  | -1.18197600 | 0.51605800  |
|                                                                                   | Cl | -0.24297800 | 2.79779600  | 0.80883400  |
|                                                                                   | Cl | 2.57388900  | -0.24217600 | 1.72009400  |
|                                                                                   | Cl | -2.29529700 | -2.12975900 | -0.98304200 |
|                                                                                   | Cl | -2.51654400 | -0.48244100 | 1.68416000  |
|                                                                                   | Cl | 2.56679500  | -1.81254500 | -0.99086700 |
|                                                                                   | O  | -0.06748500 | 2.61113100  | -2.10867700 |
|                                                                                   | H  | 2.08543300  | 1.25492700  | -1.16321300 |

Color code: P = orange, N = blue, Cl = green, O = red, H = white

### Section 5.9.3. Cartesian Coordinates for chemical species appearing in the ring-opening reaction at the PBE0/6-311+G(d,p) level of theory

**Table S151.** Cartesian coordinates (in Angstrom, Å) of the reactants (**R'**) for the HCl-initiated ring-opening reaction fully optimized at the PBE0/6-311+G(d,p) level of theory.

|                                                                                     |             |             |             |             |
|-------------------------------------------------------------------------------------|-------------|-------------|-------------|-------------|
| 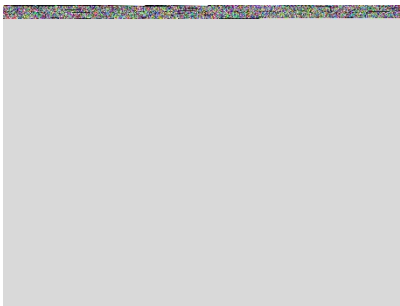 | N           | 0.00007900  | -1.23918000 | 1.35538800  |
|                                                                                     | N           | 0.00010900  | 1.11514900  | 0.00000000  |
|                                                                                     | N           | 0.00007900  | -1.23918000 | -1.35538800 |
|                                                                                     | P           | 0.00007900  | 0.34524600  | 1.40566200  |
|                                                                                     | P           | -0.00002500 | -2.06972700 | 0.00000000  |
|                                                                                     | P           | 0.00007900  | 0.34524600  | -1.40566200 |
|                                                                                     | Cl          | 1.56970300  | 0.98573400  | 2.48526800  |
|                                                                                     | Cl          | 1.56944100  | -3.32892300 | 0.00000000  |
|                                                                                     | Cl          | -1.56957500 | 0.98576600  | 2.48521300  |
|                                                                                     | Cl          | -1.56979200 | -3.32856600 | 0.00000000  |
|                                                                                     | Cl          | 1.56970300  | 0.98573400  | -2.48526800 |
|                                                                                     | Cl          | -1.56957500 | 0.98576600  | -2.48521300 |
|                                                                                     | H           | -0.00013200 | 4.31582000  | 0.00000000  |
| H                                                                                   | -0.00016000 | 3.00842000  | 0.00000000  |             |

Color code: P = orange, N = blue, Cl = green, H = white

**Table S152.** Cartesian coordinates (in Angstrom, Å) of the transition state (**TS1**) for the HCl-initiated ring-opening reaction fully optimized at the PBE0/6-311+G(d,p) level of theory.

|  |    |             |             |             |
|--|----|-------------|-------------|-------------|
|  | N  | -1.91937600 | -0.14518300 | 0.00000000  |
|  | N  | 0.44695700  | 1.18466800  | 0.00000000  |
|  | N  | 0.44770200  | -1.39943000 | 0.00000000  |
|  | P  | -1.20830100 | 1.24166500  | 0.00000000  |
|  | P  | -1.09892100 | -1.53035900 | 0.00000000  |
|  | P  | 1.47841200  | -0.16537800 | 0.00000000  |
|  | Cl | -1.74308200 | 2.37176300  | 1.56748500  |
|  | Cl | -1.74308200 | -2.61525500 | 1.56927600  |
|  | Cl | -1.74308200 | 2.37176300  | -1.56748500 |
|  | Cl | -1.74308200 | -2.61525500 | -1.56927600 |
|  | Cl | 2.52509000  | -0.56399000 | 1.67339600  |
|  | Cl | 2.52509000  | -0.56399000 | -1.67339600 |
|  | Cl | 3.01489400  | 2.04316100  | 0.00000000  |
|  | H  | 1.02850700  | 2.05132100  | 0.00000000  |

Color code: P = orange, N = blue, Cl = green, H = white

**Table S153.** Cartesian coordinates (in Angstrom, Å) of the intermediate (**Int**) for the HCl-initiated ring-opening reaction fully optimized at the PBE0/6-311+G(d,p) level of theory.

|  |    |             |             |             |
|--|----|-------------|-------------|-------------|
|  | N  | -1.87944700 | 0.43332700  | -0.26696200 |
|  | N  | 0.76465900  | 1.10120600  | -0.12997800 |
|  | N  | 0.06824100  | -1.26470500 | 0.42470800  |
|  | P  | -0.82991000 | 1.57250700  | -0.11382500 |
|  | P  | -1.41281400 | -1.09158000 | 0.02722100  |
|  | P  | 1.46243500  | -0.46377000 | 0.11782900  |
|  | Cl | -1.10517500 | 2.68536500  | 1.54611800  |
|  | Cl | -2.60360900 | -1.83404300 | 1.46864500  |
|  | Cl | -0.98087300 | 2.92795900  | -1.58134900 |
|  | Cl | -1.98511700 | -2.16221300 | -1.59408000 |
|  | Cl | 2.30207100  | -0.99504500 | 1.90719000  |
|  | Cl | 2.01181900  | -1.60910100 | -1.50107700 |
|  | Cl | 3.39456300  | 0.75316500  | -0.26748200 |
|  | H  | 1.45760900  | 1.83035300  | -0.28817400 |

Color code: P = orange, N = blue, Cl = green, H = white

**Table S154.** Cartesian coordinates (in Angstrom, Å) of the transition state (TS2) for the HCl-initiated ring-opening reaction fully optimized at the PBE0/6-311+G(d,p) level of theory.

|  |    |             |             |             |
|--|----|-------------|-------------|-------------|
|  | N  | -1.95603800 | 0.00213600  | -0.03448600 |
|  | N  | 0.44431700  | 1.25961000  | -0.18219300 |
|  | N  | 0.41439000  | -1.26558400 | -0.15783500 |
|  | P  | -1.19427900 | 1.36137000  | -0.07079700 |
|  | P  | -1.12546400 | -1.37994600 | -0.05074700 |
|  | P  | 1.56296600  | -0.12754300 | -0.04156900 |
|  | Cl | -1.64134700 | 2.50523500  | 1.52871300  |
|  | Cl | -1.68420600 | -2.42867500 | 1.58131000  |
|  | Cl | -1.79400600 | 2.52662900  | -1.59870800 |
|  | Cl | -1.86180600 | -2.49635600 | -1.55595500 |
|  | Cl | 2.09310600  | -0.17979000 | 1.93134600  |
|  | Cl | 2.92020500  | -1.40889600 | -1.00705500 |
|  | Cl | 3.03293900  | 1.48604200  | -0.56523600 |
|  | H  | 0.92992500  | 2.14740500  | -0.27673900 |

Color code: P = orange, N = blue, Cl = green, H = white

**Table S155.** Cartesian coordinates (in Angstrom, Å) of the products (P') for the HCl-initiated ring-opening reaction fully optimized at the PBE0/6-311+G(d,p) level of theory.

|  |    |             |             |             |
|--|----|-------------|-------------|-------------|
|  | N  | -1.75653600 | 0.63655800  | -0.28628300 |
|  | N  | -0.09562400 | -1.30736600 | 0.45398900  |
|  | N  | 0.91323000  | 1.04308200  | 0.03532200  |
|  | P  | -1.58836600 | -0.89837300 | 0.00017300  |
|  | P  | -0.53321100 | 1.64171400  | -0.07490300 |
|  | P  | 1.56055000  | -0.40719300 | 0.09815100  |
|  | Cl | -2.23272300 | -1.94268800 | -1.60856200 |
|  | Cl | -0.59114900 | 2.95841400  | -1.58863900 |
|  | Cl | -2.85147100 | -1.54827800 | 1.43552100  |
|  | Cl | -0.88936200 | 2.79851600  | 1.54008600  |
|  | Cl | 1.74034200  | -1.62771600 | -1.57169000 |
|  | Cl | 3.52803300  | 0.36271800  | -0.21161700 |
|  | Cl | 2.17630300  | -1.31737200 | 1.85656500  |
|  | H  | 0.02836300  | -2.26924700 | 0.74919900  |

Color code: P = orange, N = blue, Cl = green, H = white
